# Supplementary material
Source: PubMed Central journal article supplement (PMC1074792)
Supplement: pbio.0030110.sg004.pdf [file pbio.0030110.sg004.pdf]

# Figure S4 A

```
QUERY          1921  tggtattgatagcgcctcttcacagagttaggagaattacgtgaattgatacatgaataac 1980
G591P638132FH11.T0.888 480  .....a..... 539
G591P619427FB10.T0.896 454  .....a..... 513
ut.j19c10.g1.1109      483  .....a..... 424
G591P637088FC7.T0.926 203  .....a..... 262
G591P633383FH7.T0.867 176  .....a..... 235
qxu66h04.g1.1270      168  .....t.....a..... 227
qgn04f12.b1.739       85   .....a..... 144

QUERY          1981  acttagaacagaataagacctcactggacattaatagggtgactccttgaccttttgctgt 2040
G591P629550RC10.T0.906 857  .....a..... 812
G591P638132FH11.T0.888 540  ..... 558
G591P619427FB10.T0.896 514  ..... 532
ut.j19c10.g1.1109      423  ..... 405
G591P613127RG8.T0.932 323  ..... 368
qqg38d12.b1.917       538  ..... 583
uqz98h11.b1.1101      367  ..... 322
G591P637088FC7.T0.926 263  ..... 281
G591P633383FH7.T0.867 236  ..... 254
G591P604566FD3.T0.1042 250  ..... 205
qxu66h04.g1.1270      228  ..... 246
qgn04f12.b1.739       145  ..... 163

QUERY          2041  ggctgttgctcactacatgcatgtctgcctcaccttctggcttcctctccaactgccgccc 2100
G591P629550RC10.T0.906 811  .....g.....-...a...t..... 753
G591P613127RG8.T0.932 369  ..... 428
qqg38d12.b1.917       584  ..... 643
uqz98h11.b1.1101      321  ..... 262
G591P604566FD3.T0.1042 204  ..... 145
```

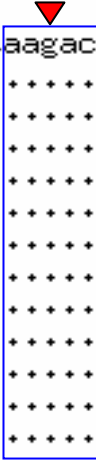

## Figure S4 B

```

QUERY          1923 gtattgatagcgctcttcacagagttaggagaattacgtgaattgatacatgaataaacac 1982
LAWNP177769.R.1009 94 .....t.....a.....g... 153
LAWRP69854.R.1112 649 .....t.....a.....g... 708
LAWNP25141.F.922 512 .....t.....a.....g... 571
LAWEP977902.R.847 769 .....c.c.....c... 749
MQAA-aes90g12.g1.660 520 .....t.....a.....g... 579
zge70g08.g1.873 607 .....t.....a.....g... 548

QUERY          1983 ttagaacagaataagacctcactggacattaataggtgactccttggctttttgctgtgg 2042
LAWNP177769.R.1009 154 .....c..... 213
LAWRP69854.R.1112 709 .....c..... 768
LAWNQ1106737.R.1188 946 ..... 939
LAWNP25141.F.922 572 .....c..... 631
LAWEP977902.R.847 748 .g.c.....g.c.....a.....g.....c.....g... 689
MQAA-aes90g12.g1.660 580 .....c..... 639
zge70g08.g1.873 547 .....c..... 488

QUERY          2043 ctgttgtcactacatgcatgtctgcctcaccttctggcttcctctccaactgccgcccc 2102
LAWEP668057.F.1327 1068 .....t.....t.... 1047
LAWNP177769.R.1009 214 .....a.....t.... 273
LAWRP69854.R.1112 769 .....a.....t.... 828
LAWNQ1106737.R.1188 938 ....-.....a..a.....t.... 880
LAWNP25141.F.922 632 .....a.....t.... 691
LAWEP977902.R.847 688 .....c.....a.....t.... 629
MQAA-aes90g12.g1.660 640 ..... 660
zge70g08.g1.873 487 .....a.....t.... 428

```
