# Supplementary material
Source: PubMed Central journal article supplement (PMC1074792)
Supplement: pbio.0030110.sg005.pdf [file pbio.0030110.sg005.pdf]

# Figure S5 A

|                       |      |                                                               |      |
|-----------------------|------|---------------------------------------------------------------|------|
| QUERY                 | 901  | tgtccttccttccgtgaacggaaaagagattgaagtggatatgtttgatgctatgggtct  | 960  |
| pyt07e06.b1.940       | 222  | .....t.....                                                   | 163  |
| ros72e10.g1.1029      | 364  | .....t.....                                                   | 423  |
| qze91c05.g1.1108      | 974  | ...t.t.....t.g.....ga.....t.                                  | 914  |
|                       |      | \                                                             |      |
|                       |      |                                                               |      |
|                       |      | g                                                             |      |
| qvg13f05.g1.874       | 656  | ...t.....t.....g.....                                         | 597  |
| QUERY                 | 961  | gaatactgacattgacccaaaaattcatatgttgaaacctaataccaatgtaatagtgtt  | 1020 |
| pyt07e06.b1.940       | 162  | .....                                                         | 126  |
| ros72e10.g1.1029      | 424  | .....                                                         | 460  |
| G591P623403RH8.T0.851 | 539  | .....C.....                                                   | 513  |
| G591P66363FF1.T0.925  | 676  | .....C.....                                                   | 650  |
| S215P6891FB9.T0.900   | 422  | .....C.....                                                   | 396  |
| qze91c05.g1.1108      | 496  | .....C.....                                                   | 470  |
| qze91c05.g1.1108      | 913  | .g.....a.....t.....                                           | 876  |
|                       |      | \                                                             |      |
|                       |      |                                                               |      |
|                       |      | c                                                             |      |
| qvg13f05.g1.874       | 596  | .....                                                         | 560  |
| qvg13f05.g1.874       | 180  | .....C.....                                                   | 154  |
| S221P60197FH3.T0.880  | 644  | .....C.....                                                   | 670  |
| QUERY                 | 1021 | aagagtaaggccctagggagaagatattaagccatgaggattccactctcatgaatgggat | 1080 |
| G591P623403RH8.T0.851 | 512  | .....                                                         | 453  |
| G591P66363FF1.T0.925  | 649  | .....                                                         | 590  |
| S215P6891FB9.T0.900   | 395  | .....                                                         | 336  |
| qze91c05.g1.1108      | 469  | .....                                                         | 410  |
| qvg13f05.g1.874       | 153  | .....                                                         | 94   |
| S221P60197FH3.T0.880  | 671  | .....                                                         | 730  |

# Figure S5 B

|                       |      |                                                                |      |
|-----------------------|------|----------------------------------------------------------------|------|
| QUERY                 | 901  | tgtcttctccttccgtgaacggaaaagagattgaagtggatatgtttgatgctatggctct  | 960  |
| RTCRL91TF,1076        | 558  | .....c...g..a..g.t.....t.....a.....                            | 499  |
| LAWEP152726,R,1218    | 304  | .....c...g..a..g.t.....t.....a.....                            | 245  |
| RHSKX29TR,1124        | 368  | .....c...g..a..g.t.....t.....a.....                            | 427  |
| zad69g09.g1,1213      | 565  | .....c...g..a..g.t.....t.....a.....                            | 506  |
| MQAA-aed14a06.b1,1213 | 117  | .....c...g..a..g.t.....t.....a.....a.....                      | 58   |
| wts56g12.g1,1502      | 400  | .....c...g..a..g.t.....t.....a.....                            | 459  |
| wnc54c08.g1,858       | 375  | .....c...g..a..g.t.....t.....a.....                            | 434  |
| LAWNP731990,R,879     | 217  | .....c...g..a..g.t.....t.....a.....                            | 276  |
| LAWNQ1127079,R,1223   | 792  | .....c...g..a..g.t.....t.....a.....                            | 733  |
| LAWNB1025,F,951       | 137  | .....c...g..a..g.t.....t.....a.....                            | 196  |
| RHNIW77TF,909         | 893  | .....t.....a.....                                              | 854  |
| LAWNQ973601,R,1172    | 171  | ..a...c...g..a..g.t..g..t.....tac..a.....a.....                | 230  |
| QUERY                 | 961  | gaatactgacattgacaaaaaatcatatggtgaaacctaataccaatgtaatagtgtt     | 1020 |
| RTCRL91TF,1076        | 498  | .....gt.....t.....c.....                                       | 439  |
| LAWEP152726,R,1218    | 244  | .....gt.....t.....c.....                                       | 185  |
| RHSKX29TR,1124        | 428  | .....gt.....t.....c.....                                       | 487  |
| zad69g09.g1,1213      | 505  | .....gt.....t.....c.....                                       | 446  |
| MQAA-aed14a06.b1,1213 | 57   | .....gt.....t.....                                             | 26   |
|                       |      | \                                                              |      |
|                       |      |                                                                |      |
|                       |      | c                                                              |      |
| wts56g12.g1,1502      | 460  | .....gt.....t.....c.....                                       | 519  |
| wnc54c08.g1,858       | 435  | .....gt.....t.....c.....                                       | 494  |
| LAWNP731990,R,879     | 277  | .....gt.....t.....c.....                                       | 336  |
| LAWNQ1127079,R,1223   | 732  | .....gt.....t.....t.....c.....                                 | 672  |
|                       |      | \                                                              |      |
|                       |      |                                                                |      |
|                       |      | g                                                              |      |
| LAWNB1025,F,951       | 197  | .....gt.....t.....c.....                                       | 256  |
| RHNIW77TF,909         | 853  | .....gt.....t.....c.....                                       | 794  |
| LAWNQ973601,R,1172    | 231  | .....gt.....t.....c.....                                       | 290  |
| QUERY                 | 1021 | aagaggttaaggccctaggggaagatattaagccatgaggattccactctcatgaatgggat | 1080 |
| RTCRL91TF,1076        | 438  | .....a.....t.....ca.....                                       | 379  |
| LAWEP152726,R,1218    | 184  | .....a.....t.....ca.....                                       | 125  |
| RHSKX29TR,1124        | 488  | .....a.....t.....ca.....                                       | 547  |
| zad69g09.g1,1213      | 445  | .....a.....t.....ca.....                                       | 386  |
