# Supplementary material
Source: PubMed Central journal article supplement (PMC1074792)
Supplement: pbio.0030110.st001.pdf [file pbio.0030110.st001.pdf]

Table S1 PCR primers and probes

| <b>Name</b> | <b>Oligonucleotide sequence</b> |
|-------------|---------------------------------|
| LTR1F       | AACAAGCCCAGTACAAACACAT          |
| LTR1R       | GGAACTAACGGTCTGGGCATAACA        |
| GAGF        | TCGCTCTGAATGGCCTGCCTTTGA        |
| GAGR        | CGGGAAATAGGACCCCCAGATGAC        |
| ENVF1       | AGCCAGCTCCTAATCCCTTTGTCT        |
| ENVF2       | TAAGCCCGGAAATTAGTGGCCAG         |
| ENVR1       | ATCCAGCGACAAGAAAACCGCCTG        |
| ENVR2       | AACTTGCCAACCTTACAGGACTTC        |
| LTR2F       | AACAAGCCCAGTACAAACACAT          |
| LTR2R       | GGAACTAACGGTCTGGGCATAACA        |

\*Oligonucleotide sequence is based on reference sequence AC097267

\*\*All oligonucleotides are 5' >> 3' orientation.

\*\*\*Probe #1 is a 510 bp PCR amplicon generated by primers GAGF and GAGR, Probe #2 is a 343bp PCR amplicon generated by LTR1F and LTR1R, while Probe #3 is a 470 PCR amplicon generated by ENVF1 and ENFR2.
