# Supplementary material
Source: PubMed Central journal article supplement (PMC1074792)
Supplement: pbio.0030110.st002.pdf [file pbio.0030110.st002.pdf]

**Table S2 Mapping of full length retroviral insertion sites on human genome (build34)**

| QNAME               | QB  | QE  | QLEN | SNAME | SB        | SE               | OREINT | FractionBP |
|---------------------|-----|-----|------|-------|-----------|------------------|--------|------------|
| RP41_16i8TV.752     | 149 | 211 | 752  | chr1  | 1371466   | 1371404          | -      | 0.967213   |
| RP43_0031I08.g1.658 | 83  | 348 | 658  | chr1  | 2198861   | <b>2199126</b>   | +      | 0.984314   |
| RP43_0031I08.b1.718 | 321 | 572 | 718  | chr1  | 2371245   | <b>2370994</b>   | -      | 1          |
| RP41_0074I19.b1.687 | 78  | 309 | 687  | chr1  | 10269507  | 10269738         | +      | 0.954545   |
| CH255_132i21TV.645  | 1   | 124 | 645  | chr1  | 13481845  | 13481968         | +      | 0.988889   |
| CH255_250I17TV.623  | 1   | 346 | 623  | chr1  | 13497056  | 13497401         | +      | 0.990826   |
| CH255_97b10TJ.357   | 4   | 149 | 357  | chr1  | 13620893  | <b>13621038</b>  | +      | 0.983051   |
| CH255_250I17TJ.812  | 677 | 796 | 812  | chr1  | 13658366  | <b>13658247</b>  | -      | 1          |
| CH255_132i21TJ.842  | 383 | 802 | 842  | chr1  | 13662925  | 13662506         | -      | 0.981333   |
| RP43_0148H12.g1.619 | 170 | 326 | 619  | chr1  | 30177937  | 30177781         | -      | 0.978873   |
| RP41_8h9TJ.612      | 1   | 96  | 612  | chr1  | 32457795  | 32457890         | +      | 0.977273   |
| RP41_2p7TV.842      | 697 | 749 | 842  | chr1  | 45193610  | <b>45193662</b>  | +      | 0.954545   |
| RP41_0057G22.b1.766 | 324 | 545 | 766  | chr1  | 45264103  | <b>45263882</b>  | -      | 0.958333   |
| RP41_20b5TJ.706     | 176 | 397 | 706  | chr1  | 45264103  | 45263882         | -      | 0.963964   |
| RP41_2p7TJ.825      | 296 | 589 | 825  | chr1  | 45338004  | 45337711         | -      | 0.989796   |
| RP41_36m15TJ.843    | 628 | 796 | 843  | chr1  | 45348404  | 45348236         | -      | 0.965986   |
| CH255_218g10TJ.638  | 1   | 394 | 638  | chr1  | 46784230  | 46784623         | +      | 0.966767   |
| CH255_218g10TV.531  | 7   | 530 | 531  | chr1  | 46805250  | 46805773         | +      | 0.987835   |
| CH255_13m13TJ.218   | 1   | 214 | 218  | chr1  | 46934606  | <b>46934819</b>  | +      | 0.990291   |
| CH255_264k10TJ.844  | 572 | 844 | 844  | chr1  | 46981395  | <b>46981123</b>  | -      | 0.990783   |
| CH255_13m13TV.230   | 7   | 192 | 230  | chr1  | 47212390  | 47212205         | -      | 0.989899   |
| RP41_19o9TV.857     | 208 | 349 | 857  | chr1  | 50571884  | <b>50572025</b>  | +      | 0.985915   |
| RP41_25j17TJ.779    | 169 | 415 | 779  | chr1  | 50772046  | <b>50771800</b>  | -      | 0.96       |
| RP43_0094M19.g1.601 | 205 | 512 | 601  | chr1  | 54621418  | <b>54621725</b>  | +      | 0.980488   |
| RP43_0094M19.b1.657 | 425 | 491 | 657  | chr1  | 54808881  | <b>54808815</b>  | -      | 1          |
| CH255_252k17TJ.770  | 1   | 600 | 770  | chr1  | 66808015  | <b>66808614</b>  | +      | 0.991259   |
| CH255_235p19TJ.634  | 315 | 403 | 634  | chr1  | 66922122  | <b>66922034</b>  | -      | 1          |
| RP41_0069F22.b1.729 | 125 | 191 | 729  | chr1  | 70068097  | 70068163         | +      | 0.969697   |
| RP41_0078K11.b1.697 | 80  | 144 | 697  | chr1  | 70171635  | <b>70171699</b>  | +      | 0.984615   |
| RP41_0069F22.g1.694 | 65  | 148 | 694  | chr1  | 70226095  | <b>70226012</b>  | -      | 1          |
| RP41_0071M18.b1.726 | 513 | 575 | 726  | chr1  | 78640618  | <b>78640680</b>  | +      | 0.9375     |
| RP41_24k19TJ.850    | 405 | 632 | 850  | chr1  | 78785325  | <b>78785098</b>  | -      | 0.938967   |
| RP41_0071M18.g1.706 | 90  | 307 | 706  | chr1  | 78826231  | 78826014         | -      | 0.956522   |
| CH255_218a4TV.763   | 1   | 50  | 763  | chr1  | 82077018  | 82077067         | +      | 1          |
| CH255_19m21TJ.447   | 75  | 136 | 447  | chr1  | 90790733  | 90790794         | +      | 0.983051   |
| CH255_10n18TV.187   | 19  | 187 | 187  | chr1  | 90866383  | <b>90866551</b>  | +      | 0.991304   |
| CH255_19m21TV.455   | 4   | 184 | 455  | chr1  | 90984597  | <b>90984417</b>  | -      | 0.980892   |
| CH255_10n18TJ.289   | 4   | 289 | 289  | chr1  | 91087424  | 91087139         | -      | 0.988439   |
| CH255_235p10TJ.645  | 216 | 645 | 645  | chr1  | 91128797  | 91128368         | -      | 0.981073   |
| CH250_18m4TJ.863    | 723 | 784 | 863  | chr1  | 91324181  | 91324120         | -      | 0.971429   |
| CH255_204j16TV.297  | 1   | 222 | 297  | chr1  | 91324728  | 91324949         | +      | 0.993548   |
| CH250_159g12TV.707  | 269 | 470 | 707  | chr1  | 91343343  | 91343142         | -      | 0.950495   |
| CH250_27g9TV.414    | 45  | 269 | 414  | chr1  | 91343848  | 91344072         | +      | 0.969466   |
| CH250_48i21TV.151   | 1   | 151 | 151  | chr1  | 96430541  | 96430691         | +      | 0.932584   |
| RP41_0159H24.g1.651 | 375 | 465 | 651  | chr1  | 101244028 | 101244118        | +      | 1          |
| RP41_0073C02.b1.746 | 552 | 644 | 746  | chr1  | 101365741 | <b>101365833</b> | +      | 1          |
| RP41_0159H24.b1.740 | 188 | 314 | 740  | chr1  | 101426629 | <b>101426503</b> | -      | 0.944882   |
| RP41_0073C02.g1.706 | 399 | 514 | 706  | chr1  | 101533357 | 101533242        | -      | 1          |
| CH255_208i3TV.634   | 522 | 633 | 634  | chr1  | 103716355 | <b>103716466</b> | +      | 1          |

|                     |     |     |     |      |           |                  |   |          |
|---------------------|-----|-----|-----|------|-----------|------------------|---|----------|
| CH255_229I3TV.842   | 100 | 230 | 842 | chr1 | 103922950 | <b>103922820</b> | - | 0.976744 |
| CH255_114d2TJ.646   | 488 | 646 | 646 | chr1 | 103941814 | 103941656        | - | 0.98     |
| RP41_0155I15.b1.757 | 105 | 481 | 757 | chr1 | 106349811 | <b>106350187</b> | + | 0.928302 |
| RP41_0155I15.g1.750 | 385 | 470 | 750 | chr1 | 106511667 | <b>106511582</b> | - | 0.944444 |
| CH250_18m4TV.514    | 227 | 360 | 514 | chr1 | 107865531 | 107865664        | + | 0.9875   |
| RP43_0054C17.b1.700 | 61  | 345 | 700 | chr1 | 111085105 | <b>111085389</b> | + | 0.972477 |
| RP43_0054C17.g1.627 | 40  | 158 | 627 | chr1 | 111253603 | <b>111253485</b> | - | 0.980769 |
| RP43_0146F10.g1.624 | 4   | 509 | 624 | chr1 | 113081765 | 113081260        | - | 0.987981 |
| RP41_31a20TJ.836    | 753 | 814 | 836 | chr1 | 119530260 | <b>119530321</b> | + | 0.972973 |
| CH250_168c7TJ.825   | 192 | 276 | 825 | chr1 | 119664263 | <b>119664347</b> | + | 0.964286 |
| RP41_31a20TV.880    | 206 | 364 | 880 | chr1 | 119690678 | <b>119690520</b> | - | 0.981132 |
| RP41_0065D07.g1.705 | 396 | 509 | 705 | chr1 | 119703847 | 119703734        | - | 1        |
| CH250_168c7TV.892   | 52  | 565 | 892 | chr1 | 119808674 | <b>119808161</b> | - | 0.973306 |
| RP43_0078P13.b1.706 | 79  | 576 | 706 | chr1 | 140709984 | 140709487        | - | 0.989362 |
| RP43_121h2TV.678    | 318 | 404 | 678 | chr1 | 141251782 | <b>141251868</b> | + | 0.988506 |
| CH255_113g12TJ.606  | 130 | 302 | 606 | chr1 | 141298487 | 141298315        | - | 0.959538 |
| RP43_0150P09.g1.632 | 432 | 507 | 632 | chr1 | 141349535 | <b>141349460</b> | - | 1        |
| CH250_82I23TJ.305   | 68  | 305 | 305 | chr1 | 142680877 | 142680640        | - | 0.941748 |
| RP43_0086D24.g1.632 | 7   | 66  | 632 | chr1 | 143036595 | 143036654        | + | 1        |
| CH250_82I23TV.433   | 1   | 166 | 433 | chr1 | 143692405 | 143692240        | - | 0.923611 |
| CH250_157I3TV.834   | 607 | 690 | 834 | chr1 | 144163994 | 144164077        | + | 0.987952 |
| CH250_41a24TV.677   | 356 | 571 | 677 | chr1 | 145503031 | 145502816        | - | 0.951087 |
| RP43_0146F10.b1.698 | 421 | 498 | 698 | chr1 | 146466476 | 146466399        | - | 1        |
| CH255_112g4TJ.640   | 7   | 108 | 640 | chr1 | 149047314 | 149047415        | + | 0.988636 |
| CH255_196n5TJ.462   | 1   | 280 | 462 | chr1 | 149177761 | <b>149178040</b> | + | 1        |
| CH255_112g4TV.360   | 4   | 360 | 360 | chr1 | 149261732 | <b>149261376</b> | - | 1        |
| CH255_196n5TV.633   | 492 | 600 | 633 | chr1 | 149393451 | 149393343        | - | 1        |
| CH250_153a24TJ.772  | 639 | 769 | 772 | chr1 | 150614117 | 150614247        | + | 0.962264 |
| CH250_159f4TV.882   | 553 | 882 | 882 | chr1 | 150656729 | <b>150657058</b> | + | 0.934066 |
| CH250_159f4TJ.844   | 326 | 560 | 844 | chr1 | 150817051 | <b>150816817</b> | - | 0.951327 |
| RP41_0058M16.b1.757 | 285 | 516 | 757 | chr1 | 152718327 | <b>152718558</b> | + | 0.971429 |
| RP41_32a11TV.797    | 15  | 68  | 797 | chr1 | 152852446 | <b>152852393</b> | - | 1        |
| RP41_0058M16.g1.690 | 58  | 333 | 690 | chr1 | 152903872 | 152903597        | - | 0.960396 |
| CH250_31c14TV.754   | 115 | 222 | 754 | chr1 | 154608239 | 154608346        | + | 0.962963 |
| CH255_43a21TV.712   | 44  | 252 | 712 | chr1 | 156110332 | <b>156110540</b> | + | 0.990244 |
| CH255_43a21TJ.681   | 558 | 680 | 681 | chr1 | 156281381 | <b>156281259</b> | - | 1        |
| CH255_125I19TV.490  | 1   | 368 | 490 | chr1 | 158044819 | 158045186        | + | 0.976027 |
| CH255_218a4TJ.769   | 408 | 769 | 769 | chr1 | 158053648 | 158054009        | + | 0.996047 |
| CH255_235b12TJ.530  | 1   | 400 | 530 | chr1 | 158063146 | 158063545        | + | 0.987952 |
| RP41_0054J10.b1.732 | 82  | 279 | 732 | chr1 | 158740635 | <b>158740832</b> | + | 0.969697 |
| RP41_0054J10.g1.721 | 88  | 545 | 721 | chr1 | 158884950 | <b>158884493</b> | - | 0.966759 |
| CH250_160n11TV.873  | 486 | 551 | 873 | chr1 | 168497127 | 168497192        | + | 0.969697 |
| RP41_0068G06.b1.728 | 74  | 126 | 728 | chr1 | 172027909 | 172027857        | - | 0.959184 |
| CH250_162c6TV.837   | 34  | 201 | 837 | chr1 | 176211987 | 176211820        | - | 0.973684 |
| RP43_106d5TV.643    | 41  | 554 | 643 | chr1 | 178140314 | <b>178140827</b> | + | 0.989733 |
| RP43_106d5TJ.737    | 4   | 210 | 737 | chr1 | 178304317 | <b>178304111</b> | - | 1        |
| RP43_0039F01.b1.734 | 281 | 531 | 734 | chr1 | 180662566 | 180662316        | - | 0.990476 |
| RP41_0091F11.g1.736 | 322 | 443 | 736 | chr1 | 183775618 | <b>183775739</b> | + | 0.957983 |
| RP41_0091F11.b1.736 | 348 | 536 | 736 | chr1 | 183926014 | <b>183925826</b> | - | 0.933884 |
| CH250_86c12TV.878   | 335 | 500 | 878 | chr1 | 185208177 | <b>185208342</b> | + | 0.932927 |
| CH250_86c12TJ.845   | 431 | 577 | 845 | chr1 | 185358908 | <b>185358762</b> | - | 0.986395 |
| CH250_65m13TJ.860   | 295 | 768 | 860 | chr1 | 185379480 | 185379007        | - | 0.970414 |

|                     |     |     |               |           |                   |          |
|---------------------|-----|-----|---------------|-----------|-------------------|----------|
| CH250_160n11TJ.862  | 608 | 741 | 862 chr1      | 192490900 | 192491033 +       | 0.954545 |
| RP41_11j24TV.777    | 8   | 232 | 777 chr1      | 225622100 | 225622324 +       | 0.936275 |
| CH250_1I23TJ.641    | 34  | 467 | 641 chr1      | 225674904 | 225675337 +       | 0.950131 |
| CH255_143g16TV.845  | 7   | 227 | 845 chr1      | 239719020 | 239719240 +       | 0.994975 |
| RP41_11i14TJ.840    | 11  | 108 | 840 chr1      | 243296279 | 243296376 +       | 0.956522 |
| CH255_143g16TJ.775  | 1   | 149 | 775 chr1      | 245098587 | 245098735 +       | 0.992806 |
| CH250_41a24TJ.847   | 386 | 785 | 847 chr1_rand | 959469    | 959868 +          | 0.975741 |
| CH250_153a24TV.672  | 15  | 162 | 672 chr1_rand | 5015019   | 5014872 -         | 0.958678 |
| RP41_42g16TV.893    | 622 | 681 | 893 chr10     | 577206    | 577147 -          | 0.945455 |
| CH250_87e16TJ.755   | 454 | 512 | 755 chr10     | 2308397   | 2308455 +         | 0.953488 |
| CH255_28j17TV.493   | 157 | 266 | 493 chr10     | 6633760   | 6633869 +         | 1        |
| CH255_211g16TV.572  | 4   | 572 | 572 chr10     | 6716352   | 6716920 +         | 0.972028 |
| CH255_211m15TV.369  | 31  | 361 | 369 chr10     | 6716394   | 6716724 +         | 0.951049 |
| CH255_136b23TV.304  | 196 | 286 | 304 chr10     | 6728197   | 6728287 +         | 1        |
| CH255_238b21TJ.166  | 1   | 166 | 166 chr10     | 6740446   | 6740611 +         | 1        |
| CH255_118c16TV.810  | 4   | 810 | 810 chr10     | 6787185   | 6787991 +         | 0.983633 |
| CH255_215c14TJ.642  | 5   | 414 | 642 chr10     | 6837335   | <b>6837744</b> +  | 0.994819 |
| CH255_28j17TJ.324   | 97  | 324 | 324 chr10     | 6898388   | <b>6898161</b> -  | 0.976923 |
| CH255_136b23TJ.772  | 650 | 772 | 772 chr10     | 6923669   | 6923547 -         | 1        |
| CH255_211m15TJ.403  | 6   | 403 | 403 chr10     | 6924213   | 6923816 -         | 0.962025 |
| CH255_211g16TJ.532  | 48  | 532 | 532 chr10     | 6924215   | 6923731 -         | 0.974522 |
| CH255_31a20TJ.291   | 1   | 75  | 291 chr10     | 6936302   | 6936376 +         | 1        |
| CH255_215c14TV.641  | 375 | 641 | 641 chr10     | 7028668   | 7028402 -         | 0.974359 |
| CH255_226f3TV.696   | 6   | 182 | 696 chr10     | 7095996   | 7095820 -         | 0.99359  |
| CH255_139m21TJ.831  | 2   | 461 | 831 chr10     | 11608744  | 11608285 -        | 0.985748 |
| RP41_0087J05.b1.690 | 147 | 315 | 690 chr10     | 17629873  | 17630041 +        | 0.955128 |
| RP43_0162P16.b1.684 | 94  | 644 | 684 chr10     | 30058338  | <b>30058888</b> + | 0.985849 |
| RP43_0162P16.g1.586 | 10  | 477 | 586 chr10     | 30193923  | <b>30193456</b> - | 0.995    |
| RP41_0094D08.g1.757 | 412 | 517 | 757 chr10     | 36775495  | <b>36775600</b> + | 0.977273 |
| RP41_0094D08.b1.755 | 37  | 499 | 755 chr10     | 36963527  | <b>36963065</b> - | 0.928571 |
| RP41_0079A06.b1.732 | 52  | 259 | 732 chr10     | 37066787  | 37066994 +        | 0.946078 |
| CH250_163a22TJ.865  | 472 | 748 | 865 chr10     | 37584164  | 37584440 +        | 0.938182 |
| RP43_132e19TV.565   | 513 | 565 | 565 chr10     | 43169530  | 43169478 -        | 1        |
| RP41_0149C03.b1.742 | 330 | 407 | 742 chr10     | 45690747  | 45690670 -        | 0.95122  |
| CH250_157I15TV.881  | 1   | 110 | 881 chr10     | 47779879  | 47779770 -        | 0.983333 |
| CH255_214f21TV.562  | 5   | 562 | 562 chr10     | 49727645  | 49728202 +        | 0.982368 |
| CH255_241i1TJ.825   | 1   | 105 | 825 chr10     | 49834828  | <b>49834932</b> + | 1        |
| CH255_230e13TJ.522  | 364 | 522 | 522 chr10     | 49952050  | <b>49951892</b> - | 1        |
| CH255_241i1TV.617   | 469 | 599 | 617 chr10     | 50087008  | 50086878 -        | 0.974576 |
| CH255_18i8TV.360    | 41  | 360 | 360 chr10     | 50087726  | 50087407 -        | 0.995192 |
| RP41_0155H22.b1.740 | 107 | 280 | 740 chr10     | 50257838  | 50258011 +        | 0.972222 |
| CH250_157I15TJ.856  | 338 | 395 | 856 chr10     | 50833597  | 50833654 +        | 0.982759 |
| RP41_0096B22.g1.753 | 219 | 527 | 753 chr10     | 55552799  | 55552491 -        | 0.947761 |
| RP43_105d1TV.621    | 223 | 515 | 621 chr10     | 61199434  | <b>61199726</b> + | 0.98913  |
| RP43_105d1TJ.594    | 21  | 214 | 594 chr10     | 61374205  | <b>61374012</b> - | 0.987879 |
| CH250_1h5TJ.580     | 53  | 109 | 580 chr10     | 63318396  | 63318452 +        | 0.979592 |
| RP41_0082H03.g1.753 | 380 | 531 | 753 chr10     | 63369779  | <b>63369930</b> + | 0.964706 |
| CH250_82f19TV.838   | 134 | 700 | 838 chr10     | 63402978  | <b>63403544</b> + | 0.94484  |
| CH250_61n13TV.711   | 216 | 407 | 711 chr10     | 63514427  | <b>63514236</b> - | 0.953125 |
| RP41_0082H03.b1.725 | 475 | 581 | 725 chr10     | 63523433  | <b>63523327</b> - | 1        |
| CH250_82f19TJ.795   | 713 | 762 | 795 chr10     | 63548296  | 63548247 -        | 1        |
| RP43_0008F10.g1.628 | 155 | 308 | 628 chr10     | 69492390  | <b>69492543</b> + | 0.992424 |

|                     |     |     |     |       |           |                  |   |          |
|---------------------|-----|-----|-----|-------|-----------|------------------|---|----------|
| RP43_0008F10.b1.712 | 85  | 390 | 712 | chr10 | 69708441  | <b>69708136</b>  | - | 0.991968 |
| CH250_145o15TV.865  | 801 | 853 | 865 | chr10 | 75668660  | 75668712         | + | 1        |
| RP41_0096B22.b1.770 | 386 | 445 | 770 | chr10 | 81255128  | 81255069         | - | 1        |
| RP43_0037D13.b1.756 | 79  | 693 | 756 | chr10 | 85370292  | <b>85370906</b>  | + | 0.978049 |
| RP43_0037D13.g1.634 | 4   | 80  | 634 | chr10 | 85559308  | <b>85559232</b>  | - | 0.983333 |
| RP43_0074F04.g1.632 | 445 | 505 | 632 | chr10 | 85648368  | 85648308         | - | 1        |
| RP41_18n20TJ.723    | 380 | 441 | 723 | chr10 | 88780396  | 88780335         | - | 0.967742 |
| CH255_110g1TJ.863   | 606 | 863 | 863 | chr10 | 90599808  | <b>90600065</b>  | + | 1        |
| CH255_110g1TV.845   | 591 | 845 | 845 | chr10 | 90788972  | <b>90788718</b>  | - | 0.993631 |
| CH255_142h23TV.787  | 379 | 740 | 787 | chr10 | 90809123  | 90808762         | - | 0.992366 |
| CH255_108I13TV.794  | 107 | 316 | 794 | chr10 | 91329911  | 91330120         | + | 0.980952 |
| CH255_10g22TJ.186   | 1   | 186 | 186 | chr10 | 91384168  | 91384353         | + | 1        |
| CH255_132m7TV.743   | 30  | 498 | 743 | chr10 | 91423515  | 91423983         | + | 0.985037 |
| CH255_4m10TJ.183    | 1   | 183 | 183 | chr10 | 91483402  | <b>91483584</b>  | + | 0.979167 |
| CH255_108I13TJ.546  | 4   | 89  | 546 | chr10 | 91560507  | <b>91560422</b>  | - | 1        |
| CH255_10g22TV.327   | 120 | 298 | 327 | chr10 | 91591496  | 91591318         | - | 0.991597 |
| CH255_132m7TJ.829   | 9   | 85  | 829 | chr10 | 91610589  | 91610513         | - | 0.985507 |
| CH255_4m10TV.170    | 13  | 168 | 170 | chr10 | 91731393  | 91731238         | - | 0.982143 |
| RP43_104n23TV.537   | 457 | 537 | 537 | chr10 | 104615764 | <b>104615844</b> | + | 1        |
| RP43_104n23TJ.348   | 210 | 269 | 348 | chr10 | 104749589 | <b>104749530</b> | - | 1        |
| RP41_0091N11.b1.775 | 127 | 206 | 775 | chr10 | 105653429 | <b>105653508</b> | + | 0.95     |
| RP41_0091N11.g1.734 | 308 | 502 | 734 | chr10 | 105830173 | <b>105829979</b> | - | 0.921348 |
| RP41_38o11TJ.817    | 533 | 771 | 817 | chr10 | 116268071 | <b>116268309</b> | + | 0.990698 |
| RP41_38o11TV.885    | 584 | 694 | 885 | chr10 | 116438850 | <b>116438740</b> | - | 0.963303 |
| CH255_25n20TJ.447   | 156 | 207 | 447 | chr10 | 117195138 | 117195189        | + | 1        |
| CH255_106i7TJ.635   | 3   | 511 | 635 | chr10 | 117202555 | 117203063        | + | 0.991398 |
| CH255_144b20TV.783  | 670 | 723 | 783 | chr10 | 117203223 | 117203276        | + | 1        |
| CH255_143o15TV.789  | 731 | 785 | 789 | chr10 | 117203280 | 117203334        | + | 1        |
| CH255_244o16TV.600  | 29  | 598 | 600 | chr10 | 117309687 | 117310256        | + | 0.983209 |
| CH255_241n11TJ.843  | 3   | 431 | 843 | chr10 | 117319735 | <b>117320163</b> | + | 0.979328 |
| CH255_25n20TV.497   | 44  | 497 | 497 | chr10 | 117413595 | <b>117413142</b> | - | 0.970516 |
| CH255_106i7TV.778   | 1   | 483 | 778 | chr10 | 117413687 | 117413205        | - | 0.968182 |
| CH255_143o15TJ.805  | 61  | 394 | 805 | chr10 | 117464537 | 117464204        | - | 0.98722  |
| CH255_144b20TJ.839  | 1   | 393 | 839 | chr10 | 117464596 | 117464204        | - | 0.988235 |
| CH255_244o16TJ.811  | 3   | 582 | 811 | chr10 | 117467572 | 117466993        | - | 0.984762 |
| CH255_107f11TV.835  | 87  | 267 | 835 | chr10 | 117529879 | 117529699        | - | 1        |
| CH255_133n10TJ.786  | 668 | 786 | 786 | chr10 | 131455824 | 131455942        | + | 1        |
| CH255_133n10TV.604  | 1   | 251 | 604 | chr10 | 131880673 | 131880923        | + | 0.982906 |
| CH255_30p2TJ.283    | 18  | 87  | 283 | chr11 | 1583898   | 1583829          | - | 1        |
| RP43_0010D20.b1.668 | 60  | 464 | 668 | chr11 | 4095247   | 4095651          | + | 0.991124 |
| RP43_0001O07.b1.709 | 396 | 538 | 709 | chr11 | 4109376   | <b>4109518</b>   | + | 1        |
| RP43_107n8TJ.740    | 657 | 737 | 740 | chr11 | 4200324   | <b>4200244</b>   | - | 1        |
| RP43_0001O07.g1.651 | 248 | 354 | 651 | chr11 | 4328757   | 4328651          | - | 0.990291 |
| RP43_0010D20.g1.661 | 255 | 361 | 661 | chr11 | 4328757   | 4328651          | - | 0.980198 |
| RP43_0042F24.b1.723 | 344 | 450 | 723 | chr11 | 4328757   | 4328651          | - | 1        |
| RP41_20e16TJ.861    | 4   | 238 | 861 | chr11 | 21379086  | 21378852         | - | 0.990654 |
| RP41_10j22TV.249    | 16  | 183 | 249 | chr11 | 26126380  | 26126547         | + | 0.937984 |
| RP41_0062J01.g1.689 | 110 | 420 | 689 | chr11 | 26155713  | 26156023         | + | 0.938907 |
| RP43_119e13TV.591   | 39  | 161 | 591 | chr11 | 29663487  | <b>29663609</b>  | + | 0.978947 |
| RP43_119e13TJ.638   | 401 | 499 | 638 | chr11 | 29833667  | <b>29833569</b>  | - | 0.987805 |
| RP41_0091E18.b1.702 | 58  | 281 | 702 | chr11 | 33618216  | 33618439         | + | 0.962791 |
| RP43_0090L07.b1.679 | 539 | 618 | 679 | chr11 | 39963777  | 39963856         | + | 1        |

|                     |     |     |     |       |           |                 |   |          |
|---------------------|-----|-----|-----|-------|-----------|-----------------|---|----------|
| RP43_127f7TV.731    | 6   | 618 | 731 | chr11 | 39993393  | <b>39994005</b> | + | 0.991319 |
| RP43_0090L07.g1.626 | 385 | 581 | 626 | chr11 | 40137802  | <b>40137606</b> | - | 0.97561  |
| RP43_127f7TJ.851    | 19  | 244 | 851 | chr11 | 40161257  | 40161032        | - | 0.981132 |
| RP43_0092B22.b1.709 | 68  | 650 | 709 | chr11 | 40189625  | 40189043        | - | 1        |
| CH250_59a10TJ.592   | 1   | 307 | 592 | chr11 | 41233350  | 41233656        | + | 0.959391 |
| CH250_47d15TV.839   | 569 | 839 | 839 | chr11 | 41287789  | 41288059        | + | 0.973684 |
| CH250_39m18TJ.428   | 174 | 389 | 428 | chr11 | 41331862  | 41332077        | + | 0.989796 |
| CH250_167b9TJ.839   | 490 | 824 | 839 | chr11 | 41345389  | <b>41345723</b> | + | 0.935018 |
| CH250_47d15TJ.880   | 452 | 561 | 880 | chr11 | 41440776  | <b>41440667</b> | - | 0.972727 |
| CH250_39m18TV.688   | 276 | 356 | 688 | chr11 | 41519091  | 41519011        | - | 0.950617 |
| CH250_77e14TV.764   | 691 | 762 | 764 | chr11 | 41520712  | 41520641        | - | 1        |
| CH250_27j14TJ.790   | 413 | 464 | 790 | chr11 | 41521006  | 41520955        | - | 0.980769 |
| CH250_167b9TV.842   | 754 | 819 | 842 | chr11 | 41524420  | 41524355        | - | 1        |
| RP43_128n12TV.386   | 328 | 386 | 386 | chr11 | 49107730  | 49107788        | + | 1        |
| RP43_0031P04.g1.572 | 1   | 113 | 572 | chr11 | 49108117  | 49108229        | + | 0.990476 |
| RP43_0092J15.b1.713 | 44  | 644 | 713 | chr11 | 49200624  | <b>49201224</b> | + | 0.993243 |
| RP43_128n22TJ.886   | 1   | 709 | 886 | chr11 | 49242155  | <b>49241447</b> | - | 0.992424 |
| RP43_0092J15.g1.611 | 1   | 340 | 611 | chr11 | 49245932  | 49245593        | - | 0.993976 |
| RP43_0031P04.b1.733 | 468 | 573 | 733 | chr11 | 49264873  | 49264768        | - | 1        |
| CH255_229i9TJ.712   | 6   | 712 | 712 | chr11 | 55034163  | 55034869        | + | 0.972713 |
| CH255_24o3TV.364    | 5   | 364 | 364 | chr11 | 55079936  | <b>55080295</b> | + | 0.972763 |
| CH255_229i9TV.263   | 42  | 263 | 263 | chr11 | 55193654  | <b>55193433</b> | - | 0.985714 |
| RP43_0016G07.b1.703 | 60  | 337 | 703 | chr11 | 55469659  | <b>55469936</b> | + | 0.980769 |
| RP43_0159M23.g1.618 | 52  | 300 | 618 | chr11 | 55689966  | <b>55689718</b> | - | 0.987854 |
| RP41_43o15TJ.843    | 1   | 214 | 843 | chr11 | 57070024  | 57070237        | + | 0.928571 |
| CH255_124i12TJ.844  | 1   | 699 | 844 | chr11 | 58034598  | 58035296        | + | 0.989614 |
| CH255_134j11TV.708  | 28  | 103 | 708 | chr11 | 58051344  | 58051419        | + | 1        |
| CH255_116d19TV.618  | 5   | 618 | 618 | chr11 | 58087850  | 58088463        | + | 0.985748 |
| CH255_194m21TJ.770  | 1   | 133 | 770 | chr11 | 58186624  | <b>58186756</b> | + | 0.990291 |
| CH255_134j11TJ.798  | 22  | 126 | 798 | chr11 | 58265667  | <b>58265563</b> | - | 0.973684 |
| CH255_100m22TJ.522  | 5   | 56  | 522 | chr11 | 58402405  | 58402354        | - | 1        |
| CH255_194m21TV.481  | 393 | 481 | 481 | chr11 | 58420556  | 58420468        | - | 0.9      |
| CH255_198p6TJ.691   | 554 | 691 | 691 | chr11 | 67556994  | 67556857        | - | 1        |
| RP43_117p9TV.634    | 1   | 145 | 634 | chr11 | 71330780  | 71330636        | - | 0.983607 |
| RP43_116p21TV.763   | 3   | 154 | 763 | chr11 | 71330787  | 71330636        | - | 0.984127 |
| RP41_0063D10.g1.713 | 413 | 532 | 713 | chr11 | 72527135  | <b>72527254</b> | + | 0.928571 |
| RP41_0063D10.b1.782 | 315 | 594 | 782 | chr11 | 72680990  | <b>72680711</b> | - | 0.983516 |
| RP43_106d3TV.417    | 5   | 110 | 417 | chr11 | 76893867  | 76893972        | + | 1        |
| RP43_100k16TV.709   | 176 | 679 | 709 | chr11 | 76954382  | <b>76954885</b> | + | 0.987539 |
| RP43_106d3TJ.739    | 447 | 583 | 739 | chr11 | 77048136  | <b>77048000</b> | - | 1        |
| RP43_100k16TJ.729   | 19  | 89  | 729 | chr11 | 77106276  | 77106206        | - | 1        |
| RP43_132o6TV.709    | 139 | 709 | 709 | chr11 | 77151393  | 77150823        | - | 0.995807 |
| RP41_0153B21.b1.747 | 140 | 552 | 747 | chr11 | 77810014  | 77810426        | + | 0.948339 |
| RP41_0079A06.g1.783 | 370 | 437 | 783 | chr11 | 80028857  | 80028924        | + | 0.96875  |
| RP43_128n12TJ.275   | 5   | 275 | 275 | chr11 | 89006125  | <b>89006395</b> | + | 0.987448 |
| RP43_128n22TV.813   | 600 | 813 | 813 | chr11 | 89134050  | <b>89133837</b> | - | 1        |
| RP41_0063H12.g1.717 | 393 | 619 | 717 | chr11 | 97099878  | 97100104        | + | 0.968504 |
| RP41_0093N22.g1.761 | 78  | 424 | 761 | chr11 | 107356144 | 107355798       | - | 0.953988 |
| RP41_0064N05.b1.781 | 310 | 514 | 781 | chr11 | 124982210 | 124982006       | - | 0.978022 |
| CH255_230j16TV.545  | 162 | 231 | 545 | chr11 | 126361041 | 126361110       | + | 1        |
| RP41_0056P04.b1.773 | 471 | 570 | 773 | chr11 | 129479319 | 129479418       | + | 1        |
| RP41_0084L23.g1.750 | 140 | 499 | 750 | chr11 | 129479319 | 129479678       | + | 0.978723 |



|                     |     |     |           |           |                    |          |
|---------------------|-----|-----|-----------|-----------|--------------------|----------|
| RP41_31c17TV.820    | 552 | 686 | 820 chr11 | 129601570 | <b>129601704</b> + | 0.956897 |
| RP41_0084L23.b1.745 | 61  | 257 | 745 chr11 | 129640772 | <b>129640576</b> - | 0.930481 |
| CH255_25n24TJ.168   | 1   | 105 | 168 chr12 | 5753402   | 5753298 -          | 1        |
| RP43_117p9TJ.685    | 1   | 264 | 685 chr12 | 8259596   | 8259333 -          | 0.982222 |
| RP43_0171M16.b1.714 | 48  | 311 | 714 chr12 | 8671341   | 8671078 -          | 0.991525 |
| CH255_265i22TV.507  | 6   | 114 | 507 chr12 | 9536432   | 9536540 +          | 1        |
| CH255_134e3TJ.726   | 411 | 625 | 726 chr12 | 13371269  | 13371483 +         | 1        |
| CH255_223l24TV.829  | 2   | 598 | 829 chr12 | 13391292  | 13391888 +         | 0.98579  |
| CH255_271k22TJ.633  | 2   | 92  | 633 chr12 | 13414475  | <b>13414565</b> +  | 0.985294 |
| CH255_223l24TJ.859  | 128 | 399 | 859 chr12 | 13578365  | <b>13578094</b> -  | 0.988189 |
| CH255_134e3TV.793   | 1   | 435 | 793 chr12 | 13617000  | 13616566 -         | 0.997579 |
| CH255_271k22TV.604  | 327 | 450 | 604 chr12 | 13621177  | 13621054 -         | 0.99115  |
| RP43_0092J08.b1.738 | 49  | 274 | 738 chr12 | 14743936  | <b>14744161</b> +  | 0.995283 |
| RP43_0092J08.g1.640 | 5   | 315 | 640 chr12 | 14891692  | <b>14891382</b> -  | 0.996564 |
| RP43_0084K05.g1.642 | 55  | 512 | 642 chr12 | 14931749  | 14931292 -         | 0.989189 |
| RP43_0064A24.g1.631 | 140 | 287 | 631 chr12 | 20595772  | 20595625 -         | 1        |
| RP41_0065L01.g1.714 | 100 | 329 | 714 chr12 | 23266353  | <b>23266582</b> +  | 0.960352 |
| RP41_0065L01.b1.764 | 191 | 587 | 764 chr12 | 23444356  | <b>23443960</b> -  | 0.973154 |
| RP41_0072L10.b1.722 | 46  | 115 | 722 chr12 | 29438345  | 29438276 -         | 1        |
| CH255_265i22TJ.617  | 1   | 250 | 617 chr12 | 31018232  | 31018481 +         | 0.974138 |
| CH255_218m11TV.362  | 117 | 362 | 362 chr12 | 31018823  | 31019068 +         | 0.981013 |
| CH255_211d13TJ.425  | 6   | 185 | 425 chr12 | 31202306  | 31202485 +         | 1        |
| CH255_TV.220        | 6   | 153 | 220 chr12 | 31202338  | <b>31202485</b> +  | 1        |
| CH255_218m11TJ.738  | 53  | 151 | 738 chr12 | 31252824  | <b>31252726</b> -  | 0.989899 |
| CH255_TJ.398        | 6   | 133 | 398 chr12 | 31394475  | 31394348 -         | 0.97479  |
| RP43_0088A08.g1.634 | 235 | 518 | 634 chr12 | 31735776  | 31736059 +         | 1        |
| RP43_0002J22.g1.634 | 41  | 272 | 634 chr12 | 31775357  | <b>31775588</b> +  | 0.986607 |
| CH250_21m16TJ.537   | 379 | 472 | 537 chr12 | 31793783  | <b>31793876</b> +  | 0.945055 |
| RP43_0088A08.b1.682 | 175 | 442 | 682 chr12 | 31889282  | <b>31889015</b> -  | 0.977477 |
| CH250_92e23TV.880   | 56  | 283 | 880 chr12 | 31987590  | <b>31987363</b> -  | 0.961905 |
| RP43_127h15TV.632   | 449 | 515 | 632 chr12 | 32008779  | 32008845 +         | 1        |
| RP43_0011E17.g1.648 | 171 | 242 | 648 chr12 | 32056430  | 32056501 +         | 0.986111 |
| RP43_127h15TJ.629   | 56  | 269 | 629 chr12 | 32161301  | 32161088 -         | 0.984211 |
| RP43_0011E17.b1.726 | 39  | 634 | 726 chr12 | 32205862  | 32205267 -         | 0.995485 |
| RP41_0060B06.b1.743 | 397 | 499 | 743 chr12 | 34202192  | 34202294 +         | 1        |
| CH255_106m4TJ.535   | 250 | 535 | 535 chr12 | 34262656  | 34262941 +         | 0.972028 |
| CH255_107e12TJ.562  | 206 | 562 | 562 chr12 | 34262656  | 34263012 +         | 0.977011 |
| CH255_26k20TV.338   | 4   | 113 | 338 chr12 | 34291908  | 34292017 +         | 0.988372 |
| CH255_266f19TV.434  | 3   | 104 | 434 chr12 | 34295869  | <b>34295970</b> +  | 1        |
| CH255_114b1TV.672   | 235 | 672 | 672 chr12 | 34450800  | <b>34450363</b> -  | 0.985836 |
| RP43_0161G01.b1.696 | 58  | 221 | 696 chr12 | 37692890  | 37693053 +         | 1        |
| RP43_125h4TJ.852    | 17  | 781 | 852 chr12 | 37737657  | <b>37738421</b> +  | 0.988235 |
| RP43_0161G01.g1.632 | 53  | 441 | 632 chr12 | 37885502  | <b>37885114</b> -  | 0.988539 |
| RP43_125h4TV.871    | 6   | 202 | 871 chr12 | 37933261  | 37933065 -         | 1        |
| RP43_0156N09.b1.720 | 76  | 464 | 720 chr12 | 40317063  | 40317451 +         | 0.986945 |
| RP41_18h11TJ.796    | 2   | 261 | 796 chr12 | 51522427  | <b>51522686</b> +  | 0.944915 |
| RP41_18h11TV.829    | 644 | 770 | 829 chr12 | 51689292  | <b>51689166</b> -  | 0.958763 |
| CH250_151m15TJ.319  | 87  | 293 | 319 chr12 | 53504049  | <b>53504255</b> +  | 0.911765 |
| CH250_151m15TV.569  | 163 | 244 | 569 chr12 | 53683992  | <b>53683911</b> -  | 1        |
| RP43_136b17TJ.780   | 230 | 328 | 780 chr12 | 57816324  | 57816422 +         | 1        |
| RP43_0168B11.b1.712 | 524 | 593 | 712 chr12 | 57989536  | <b>57989605</b> +  | 1        |
| RP43_0168B11.g1.617 | 6   | 110 | 617 chr12 | 58145855  | <b>58145751</b> -  | 0.989362 |

|                     |     |     |           |           |                    |          |
|---------------------|-----|-----|-----------|-----------|--------------------|----------|
| CH255_28i21TV.407   | 34  | 407 | 407 chr12 | 64295322  | 64295695 +         | 0.996587 |
| CH255_226i21TJ.775  | 720 | 775 | 775 chr12 | 65957107  | 65957162 +         | 1        |
| CH255_140n7TV.799   | 495 | 758 | 799 chr12 | 66062205  | <b>66062468</b> +  | 0.995851 |
| CH255_226i21TV.819  | 4   | 60  | 819 chr12 | 66153708  | <b>66153652</b> -  | 1        |
| CH255_140n7TJ.695   | 109 | 427 | 695 chr12 | 66258679  | 66258361 -         | 0.984277 |
| CH250_75n16TJ.546   | 448 | 533 | 546 chr12 | 69012728  | <b>69012813</b> +  | 0.986842 |
| CH250_75n16TV.891   | 248 | 496 | 891 chr12 | 69193848  | <b>69193600</b> -  | 0.971888 |
| CH250_68j17TV.790   | 4   | 110 | 790 chr12 | 69325337  | 69325231 -         | 0.978495 |
| RP43_0078O15.b1.674 | 174 | 640 | 674 chr12 | 70727957  | <b>70728423</b> +  | 0.982699 |
| RP43_0078O15.g1.637 | 486 | 597 | 637 chr12 | 70906185  | <b>70906074</b> -  | 1        |
| RP43_0046M12.b1.715 | 62  | 386 | 715 chr12 | 75032735  | <b>75033059</b> +  | 0.996633 |
| RP43_0046M12.g1.628 | 437 | 487 | 628 chr12 | 75223870  | <b>75223820</b> -  | 1        |
| CH255_266i12TJ.541  | 30  | 515 | 541 chr12 | 78218096  | 78218581 +         | 0.975    |
| CH255_240b24TJ.783  | 75  | 783 | 783 chr12 | 78223697  | 78224405 +         | 0.991453 |
| CH255_128o22TJ.858  | 20  | 686 | 858 chr12 | 78247785  | 78248451 +         | 0.991961 |
| CH255_2h7TJ.190     | 1   | 188 | 190 chr12 | 78315792  | 78315979 +         | 0.983871 |
| CH255_46f4TV.508    | 232 | 505 | 508 chr12 | 78323387  | 78323660 +         | 0.978261 |
| CH255_48f6TJ.391    | 48  | 391 | 391 chr12 | 78406514  | <b>78406857</b> +  | 0.994118 |
| CH255_266i12TV.429  | 1   | 373 | 429 chr12 | 78422094  | <b>78421722</b> -  | 0.991031 |
| CH255_240b24TV.614  | 4   | 614 | 614 chr12 | 78427807  | 78427197 -         | 0.988038 |
| CH255_128o22TV.813  | 1   | 481 | 813 chr12 | 78453458  | 78452978 -         | 0.993392 |
| CH255_46f4TJ.741    | 319 | 462 | 741 chr12 | 78549727  | 78549584 -         | 0.992908 |
| CH255_48f6TV.544    | 193 | 248 | 544 chr12 | 78628930  | 78628875 -         | 0.979167 |
| CH255_42n19TV.323   | 1   | 63  | 323 chr12 | 78685544  | 78685482 -         | 1        |
| RP43_103n21TV.469   | 1   | 253 | 469 chr12 | 84266417  | 84266669 +         | 0.995708 |
| RP43_0064I13.b1.653 | 73  | 424 | 653 chr12 | 84284765  | <b>84285116</b> +  | 0.993399 |
| RP43_103n21TJ.292   | 45  | 292 | 292 chr12 | 84427923  | <b>84427676</b> -  | 0.990291 |
| RP43_0064I13.g1.623 | 2   | 195 | 623 chr12 | 84476436  | 84476243 -         | 1        |
| RP43_114d9TV.459    | 233 | 293 | 459 chr12 | 87030761  | <b>87030821</b> +  | 1        |
| RP43_114d9TJ.730    | 7   | 277 | 730 chr12 | 87207506  | <b>87207236</b> -  | 0.984211 |
| RP43_0092M12.b1.698 | 89  | 585 | 698 chr12 | 89180911  | 89181407 +         | 0.984043 |
| CH250_68h14TV.626   | 269 | 355 | 626 chr12 | 94191068  | <b>94191154</b> +  | 0.965517 |
| CH250_68h14TJ.863   | 1   | 127 | 863 chr12 | 94362372  | <b>94362246</b> -  | 0.979381 |
| CH250_50j9TJ.520    | 229 | 515 | 520 chr12 | 94443727  | 94443441 -         | 0.973913 |
| CH250_164j3TV.726   | 1   | 262 | 726 chr12 | 94491636  | 94491375 -         | 0.972603 |
| CH255_127k22TJ.834  | 256 | 834 | 834 chr12 | 96505645  | 96506223 +         | 0.982792 |
| CH255_230m2TJ.835   | 4   | 833 | 835 chr12 | 96576737  | <b>96577566</b> +  | 0.986919 |
| CH255_230m2TV.844   | 216 | 270 | 844 chr12 | 96746067  | <b>96746013</b> -  | 1        |
| CH255_127k22TV.628  | 268 | 601 | 628 chr12 | 96747572  | 96747239 -         | 0.995745 |
| RP41_0072K13.g1.702 | 81  | 410 | 702 chr12 | 103427036 | 103427365 +        | 0.961905 |
| CH255_106d12TV.855  | 422 | 855 | 855 chr12 | 103687689 | <b>103688122</b> + | 0.984277 |
| CH255_106d12TJ.751  | 4   | 276 | 751 chr12 | 103919781 | <b>103919509</b> - | 0.992248 |
| CH255_248e5TJ.806   | 636 | 694 | 806 chr12 | 126004028 | 126004086 +        | 0.945455 |
| RP43_107p14TV.609   | 511 | 608 | 609 chr13 | 17077370  | 17077467 +         | 0.945946 |
| RP43_0048A10.b1.744 | 403 | 521 | 744 chr13 | 17098478  | <b>17098596</b> +  | 0.985714 |
| RP43_126I13TJ.762   | 138 | 762 | 762 chr13 | 17233754  | <b>17233130</b> -  | 0.992063 |
| RP43_0152N19.g1.593 | 53  | 275 | 593 chr13 | 22103337  | 22103559 +         | 0.986425 |
| RP43_0032H03.g1.606 | 212 | 375 | 606 chr13 | 22150087  | 22150250 +         | 1        |
| RP43_107i4TJ.573    | 45  | 266 | 573 chr13 | 22181268  | <b>22181489</b> +  | 0.986301 |
| RP43_0152N19.b1.686 | 75  | 130 | 686 chr13 | 22286237  | <b>22286182</b> -  | 0.981481 |
| RP43_107i4TV.566    | 13  | 86  | 566 chr13 | 22349485  | 22349412 -         | 0.969697 |
| RP43_0032H03.b1.701 | 388 | 467 | 701 chr13 | 22354137  | 22354058 -         | 1        |

|                     |     |     |           |          |            |          |
|---------------------|-----|-----|-----------|----------|------------|----------|
| RP41_24k19TV.846    | 694 | 789 | 846 chr13 | 23051303 | 23051208 - | 0.983333 |
| RP41_20I3TV.247     | 4   | 166 | 247 chr13 | 23051582 | 23051420 - | 0.954545 |
| RP41_20I19TV.806    | 116 | 212 | 806 chr13 | 23051826 | 23051730 - | 1        |
| RP43_126n22TJ.355   | 121 | 270 | 355 chr13 | 25831700 | 25831849 + | 0.94     |
| RP43_129j10TJ.326   | 138 | 287 | 326 chr13 | 25831700 | 25831849 + | 0.916031 |
| RP43_0147E05.g1.529 | 93  | 225 | 529 chr13 | 25831717 | 25831849 + | 0.934426 |
| RP43_101p2TV.160    | 6   | 125 | 160 chr13 | 25831732 | 25831851 + | 0.93617  |
| CH250_83i3TV.809    | 235 | 323 | 809 chr13 | 29470100 | 29470012 - | 0.966292 |
| CH250_147I22TJ.849  | 293 | 656 | 849 chr13 | 37175697 | 37176060 + | 0.963788 |
| CH250_3g18TJ.854    | 302 | 665 | 854 chr13 | 37175697 | 37176060 + | 0.963889 |
| CH255_7d21TJ.103    | 6   | 103 | 103 chr13 | 37223746 | 37223649 - | 0.976744 |
| CH250_160a2TV.741   | 124 | 195 | 741 chr13 | 37230733 | 37230804 + | 0.957143 |
| CH250_24e14TV.669   | 324 | 669 | 669 chr13 | 37253445 | 37253790 + | 0.971429 |
| CH250_24c18TV.738   | 331 | 734 | 738 chr13 | 37253445 | 37253848 + | 0.971519 |
| CH250_75h1TJ.838    | 371 | 816 | 838 chr13 | 37253445 | 37253890 + | 0.957711 |
| CH250_57m15TJ.634   | 510 | 570 | 634 chr13 | 37283230 | 37283290 + | 1        |
| CH250_147I22TV.897  | 602 | 668 | 897 chr13 | 37394975 | 37394909 - | 1        |
| CH250_160a2TJ.717   | 504 | 717 | 717 chr13 | 37417461 | 37417248 - | 0.978022 |
| CH255_217b23TV.563  | 4   | 265 | 563 chr13 | 39558571 | 39558310 - | 0.987013 |
| CH255_12n9TJ.227    | 18  | 134 | 227 chr13 | 46743807 | 46743923 + | 1        |
| CH255_115h12TV.685  | 13  | 304 | 685 chr13 | 46867839 | 46868130 + | 0.996516 |
| CH255_37k1TV.168    | 43  | 98  | 168 chr13 | 46964895 | 46964950 + | 1        |
| CH255_115h12TJ.609  | 526 | 609 | 609 chr13 | 47081425 | 47081342 - | 1        |
| CH255_144n9TJ.465   | 189 | 281 | 465 chr13 | 47098174 | 47098082 - | 0.98     |
| CH255_12k21TJ.228   | 1   | 67  | 228 chr13 | 47210757 | 47210691 - | 1        |
| CH255_37k1TJ.730    | 5   | 564 | 730 chr13 | 47214610 | 47214051 - | 0.982906 |
| CH250_159o1TJ.865   | 46  | 286 | 865 chr13 | 50371438 | 50371678 + | 0.964758 |
| RP43_0068H15.g1.643 | 387 | 497 | 643 chr13 | 50386979 | 50387089 + | 1        |
| CH250_159o1TV.871   | 40  | 503 | 871 chr13 | 50520801 | 50520338 - | 0.965278 |
| RP41_30b9TJ.800     | 615 | 686 | 800 chr13 | 58809080 | 58809151 + | 0.972222 |
| RP41_0052J10.g1.702 | 99  | 626 | 702 chr13 | 58897734 | 58898261 + | 0.957295 |
| RP41_0052J10.b1.797 | 220 | 273 | 797 chr13 | 59081555 | 59081502 - | 0.962963 |
| RP41_8g22TV.884     | 26  | 748 | 884 chr13 | 60897059 | 60897781 + | 0.925    |
| RP41_0079L23.g1.691 | 306 | 405 | 691 chr13 | 61515146 | 61515245 + | 0.972222 |
| RP41_0051O18.g1.726 | 502 | 555 | 726 chr13 | 61570391 | 61570338 - | 1        |
| RP41_0079L23.b1.725 | 274 | 550 | 725 chr13 | 61662469 | 61662193 - | 0.937008 |
| RP41_0075I08.g1.745 | 302 | 512 | 745 chr13 | 75735800 | 75736010 + | 0.949153 |
| RP41_0075I08.b1.734 | 175 | 280 | 734 chr13 | 75890954 | 75890849 - | 0.933962 |
| CH255_127i6TJ.829   | 1   | 815 | 829 chr13 | 78899285 | 78900099 + | 0.988281 |
| CH255_217b22TV.822  | 454 | 822 | 822 chr13 | 79162572 | 79162204 - | 0.994595 |
| CH255_234k20TV.550  | 320 | 550 | 550 chr13 | 79241459 | 79241229 - | 1        |
| RP41_8p20TJ.835     | 546 | 639 | 835 chr13 | 86427597 | 86427690 + | 0.978261 |
| RP41_0165D12.g1.722 | 268 | 322 | 722 chr13 | 87813254 | 87813308 + | 0.963636 |
| RP41_0165D12.b1.744 | 187 | 523 | 744 chr13 | 87961051 | 87960715 - | 0.925926 |
| RP41_8p20TV.864     | 744 | 837 | 864 chr13 | 90551635 | 90551728 + | 0.926829 |
| RP41_0095M03.g1.708 | 160 | 262 | 708 chr13 | 91126248 | 91126146 - | 0.961165 |
| CH250_172c10TJ.846  | 1   | 234 | 846 chr13 | 95686016 | 95686249 + | 0.975369 |
| RP41_0050D04.g1.751 | 257 | 530 | 751 chr13 | 95732167 | 95732440 + | 0.945312 |
| RP41_0068D04.b1.774 | 512 | 637 | 774 chr13 | 95754130 | 95754255 + | 1        |
| CH250_23a7TJ.466    | 312 | 466 | 466 chr13 | 95821229 | 95821075 - | 1        |
| CH250_172c10TV.888  | 712 | 786 | 888 chr13 | 95843921 | 95843847 - | 0.971831 |
| RP41_0050D04.b1.776 | 64  | 117 | 776 chr13 | 95888828 | 95888775 - | 0.954545 |



|                     |     |     |     |       |          |          |   |          |
|---------------------|-----|-----|-----|-------|----------|----------|---|----------|
| RP41_0068D04.g1.688 | 103 | 203 | 688 | chr13 | 95923724 | 95923624 | - | 0.976471 |
| RP41_0072B21.b1.745 | 339 | 591 | 745 | chr14 | 18937590 | 18937842 | + | 0.95302  |
| RP43_0161K06.g1.620 | 3   | 432 | 620 | chr14 | 18946695 | 18947124 | + | 0.977143 |
| RP41_10g5TJ.750     | 396 | 750 | 750 | chr14 | 19098959 | 19099313 | + | 0.948718 |
| RP41_0072B21.g1.699 | 102 | 194 | 699 | chr14 | 19110956 | 19110864 | - | 0.964706 |
| RP43_0161K06.b1.717 | 67  | 578 | 717 | chr14 | 19116461 | 19115950 | - | 0.985037 |
| CH255_138p14TV.701  | 244 | 588 | 701 | chr14 | 19141023 | 19141367 | + | 0.978873 |
| CH250_23o20TV.689   | 426 | 688 | 689 | chr14 | 19199998 | 19199736 | - | 0.937888 |
| RP41_10g5TV.821     | 345 | 428 | 821 | chr14 | 19229243 | 19229160 | - | 0.952381 |
| CH255_138p14TJ.811  | 196 | 255 | 811 | chr14 | 19318404 | 19318345 | - | 1        |
| RP41_42o1TJ.824     | 305 | 389 | 824 | chr14 | 22817437 | 22817521 | + | 0.951807 |
| RP41_0083J15.g1.727 | 184 | 530 | 727 | chr14 | 22836586 | 22836932 | + | 0.969466 |
| RP41_0083J15.b1.739 | 113 | 197 | 739 | chr14 | 23070298 | 23070214 | - | 0.976471 |
| RP41_0159G06.b1.770 | 65  | 136 | 770 | chr14 | 32757627 | 32757698 | + | 0.951613 |
| RP41_0159C06.b1.805 | 537 | 641 | 805 | chr14 | 32758104 | 32758208 | + | 1        |
| RP41_0051N02.g1.725 | 340 | 548 | 725 | chr14 | 33069025 | 33068817 | - | 0.977401 |
| CH250_65b3TV.821    | 423 | 656 | 821 | chr14 | 39846093 | 39846326 | + | 0.931818 |
| CH250_80c22TV.596   | 197 | 465 | 596 | chr14 | 39849955 | 39850223 | + | 0.943089 |
| CH250_65b3TJ.848    | 559 | 650 | 848 | chr14 | 40003285 | 40003194 | - | 0.973684 |
| CH250_80c22TJ.573   | 252 | 573 | 573 | chr14 | 40022331 | 40022010 | - | 0.950226 |
| CH255_24d21TV.664   | 4   | 77  | 664 | chr14 | 41756820 | 41756893 | + | 1        |
| CH255_216c9TJ.534   | 188 | 311 | 534 | chr14 | 41793623 | 41793746 | + | 1        |
| CH255_28o3TJ.290    | 239 | 290 | 290 | chr14 | 41813542 | 41813593 | + | 1        |
| CH255_121a5TV.616   | 1   | 155 | 616 | chr14 | 41872045 | 41871891 | - | 0.992593 |
| CH255_216c9TV.453   | 7   | 267 | 453 | chr14 | 41986027 | 41985767 | - | 0.97479  |
| CH255_24d21TJ.357   | 2   | 181 | 357 | chr14 | 42007378 | 42007199 | - | 0.99359  |
| CH255_250e1TJ.839   | 730 | 797 | 839 | chr14 | 42012961 | 42012894 | - | 1        |
| CH255_28o3TV.442    | 39  | 149 | 442 | chr14 | 42020553 | 42020443 | - | 0.990991 |
| RP43_0008B11.g1.631 | 310 | 445 | 631 | chr14 | 43532010 | 43532145 | + | 0.987952 |
| CH250_24I7TJ.800    | 525 | 646 | 800 | chr14 | 54786663 | 54786784 | + | 0.961538 |
| RP43_0161M12.g1.628 | 133 | 495 | 628 | chr14 | 56969202 | 56969564 | + | 1        |
| RP43_0170G04.g1.587 | 323 | 550 | 587 | chr14 | 57012160 | 57012387 | + | 0.985507 |
| RP43_0161M12.b1.713 | 280 | 582 | 713 | chr14 | 57126230 | 57125928 | - | 0.995283 |
| RP43_0170G04.b1.681 | 409 | 564 | 681 | chr14 | 57176116 | 57175961 | - | 0.972973 |
| RP41_0085C08.g1.712 | 52  | 446 | 712 | chr14 | 63871429 | 63871035 | - | 0.95053  |
| RP41_28b8TJ.442     | 1   | 390 | 442 | chr14 | 63933355 | 63932966 | - | 0.877193 |
| RP41_0063L15.b1.764 | 145 | 232 | 764 | chr14 | 85582164 | 85582077 | - | 0.943182 |
| CH255_216g5TJ.725   | 498 | 725 | 725 | chr14 | 86279907 | 86280134 | + | 1        |
| CH255_7d13TJ.211    | 1   | 209 | 211 | chr14 | 86384483 | 86384275 | - | 0.989691 |
| CH255_262b17TJ.675  | 226 | 675 | 675 | chr14 | 86478962 | 86478513 | - | 0.984326 |
| RP41_0049I20.b1.785 | 44  | 322 | 785 | chr14 | 89865058 | 89865336 | + | 0.976    |
| RP41_35p19TJ.825    | 764 | 825 | 825 | chr14 | 89877302 | 89877363 | + | 1        |
| RP41_35p19TV.883    | 524 | 735 | 883 | chr14 | 90075946 | 90075735 | - | 0.97619  |
| RP41_0054H02.g1.716 | 333 | 433 | 716 | chr14 | 90083718 | 90083618 | - | 0.980198 |
| CH250_58I16TJ.855   | 396 | 713 | 855 | chr15 | 35091917 | 35092234 | + | 0.968553 |
| CH250_58I16TV.824   | 1   | 432 | 824 | chr15 | 35254829 | 35254398 | - | 0.968825 |
| CH255_112j3TJ.761   | 7   | 587 | 761 | chr15 | 41154339 | 41153759 | - | 0.989228 |
| RP43_0048A10.g1.662 | 456 | 548 | 662 | chr15 | 44255403 | 44255311 | - | 1        |
| RP41_0074C18.g1.690 | 167 | 230 | 690 | chr15 | 45143272 | 45143335 | + | 0.949153 |
| RP41_0074M02.g1.719 | 169 | 232 | 719 | chr15 | 45143272 | 45143335 | + | 0.953125 |
| RP41_0088G23.g1.752 | 318 | 404 | 752 | chr15 | 45190335 | 45190421 | + | 0.980392 |
| RP41_0088G23.b1.749 | 428 | 621 | 749 | chr15 | 45223405 | 45223212 | - | 1        |

|                     |     |     |     |       |          |                 |   |          |
|---------------------|-----|-----|-----|-------|----------|-----------------|---|----------|
| RP41_0067H14.g1.699 | 372 | 449 | 699 | chr15 | 45362304 | 45362227        | - | 0.96     |
| RP43_0068J13.b1.686 | 483 | 602 | 686 | chr15 | 46316931 | <b>46317050</b> | + | 1        |
| RP43_0068J13.g1.640 | 354 | 498 | 640 | chr15 | 46495781 | <b>46495637</b> | - | 1        |
| RP41_0095N07.g1.739 | 74  | 467 | 739 | chr15 | 47616116 | <b>47616509</b> | + | 0.95203  |
| RP41_0095N07.b1.757 | 144 | 361 | 757 | chr15 | 47776055 | <b>47775838</b> | - | 0.943925 |
| RP43_122i7TV.662    | 213 | 662 | 662 | chr15 | 47816748 | <b>47817197</b> | + | 0.98893  |
| RP43_122i7TJ.893    | 25  | 865 | 893 | chr15 | 47926522 | <b>47925682</b> | - | 0.980597 |
| CH250_43m21TV.734   | 557 | 610 | 734 | chr15 | 53039577 | 53039630        | + | 0.967742 |
| CH250_35e23TV.765   | 147 | 201 | 765 | chr15 | 53087021 | <b>53087075</b> | + | 1        |
| CH250_161h5TJ.854   | 626 | 730 | 854 | chr15 | 53151400 | <b>53151296</b> | - | 0.961905 |
| CH250_43m21TJ.507   | 105 | 459 | 507 | chr15 | 53207709 | 53207355        | - | 0.950739 |
| RP41_0050B19.g1.731 | 480 | 544 | 731 | chr15 | 55282880 | <b>55282944</b> | + | 1        |
| RP41_0050B19.b1.788 | 64  | 433 | 788 | chr15 | 55447388 | <b>55447019</b> | - | 0.976959 |
| RP41_0072A21.b1.748 | 278 | 361 | 748 | chr15 | 55508508 | 55508425        | - | 0.940476 |
| CH255_126h15TV.603  | 400 | 511 | 603 | chr15 | 66253400 | 66253289        | - | 0.977778 |
| RP41_0088L09.g1.753 | 51  | 274 | 753 | chr15 | 69228033 | 69228256        | + | 0.948718 |
| RP41_0068A16.b1.737 | 52  | 131 | 737 | chr15 | 69268180 | <b>69268259</b> | + | 1        |
| RP41_0088L09.b1.675 | 176 | 248 | 675 | chr15 | 69419827 | <b>69419755</b> | - | 0.958904 |
| RP41_0068A16.g1.723 | 358 | 533 | 723 | chr15 | 69433720 | 69433545        | - | 0.96     |
| RP41_0090L21.b1.773 | 191 | 323 | 773 | chr15 | 95694506 | <b>95694638</b> | + | 0.932331 |
| RP41_0090L21.g1.764 | 68  | 471 | 764 | chr15 | 95842589 | <b>95842186</b> | - | 0.953488 |
| RP43_0011J24.g1.630 | 142 | 265 | 630 | chr16 | 10314690 | 10314813        | + | 1        |
| RP43_0090O17.b1.682 | 152 | 212 | 682 | chr16 | 10625559 | 10625499        | - | 1        |
| RP43_0076H05.g1.626 | 88  | 460 | 626 | chr16 | 10720715 | 10720343        | - | 0.993485 |
| RP41_0059H10.b1.755 | 207 | 327 | 755 | chr16 | 11775775 | <b>11775895</b> | + | 1        |
| RP41_0059H10.g1.704 | 213 | 510 | 704 | chr16 | 11929214 | <b>11928917</b> | - | 0.941176 |
| RP41_43e12TV.807    | 152 | 262 | 807 | chr16 | 16545494 | 16545604        | + | 0.972477 |
| RP43_104e11TV.412   | 128 | 267 | 412 | chr16 | 16855638 | <b>16855777</b> | + | 1        |
| RP43_104e11TJ.730   | 631 | 730 | 730 | chr16 | 17032576 | <b>17032477</b> | - | 1        |
| RP41_0080K03.g1.734 | 298 | 511 | 734 | chr16 | 18096599 | 18096812        | + | 0.973684 |
| RP41_43e12TJ.808    | 89  | 182 | 808 | chr16 | 18111601 | <b>18111694</b> | + | 0.978495 |
| RP41_0080K03.b1.721 | 113 | 200 | 721 | chr16 | 18263812 | <b>18263725</b> | - | 0.933333 |
| RP41_0075J05.g1.740 | 60  | 336 | 740 | chr16 | 22837597 | 22837873        | + | 0.942529 |
| RP41_0065K08.b1.768 | 343 | 543 | 768 | chr16 | 30447134 | <b>30447334</b> | + | 0.969231 |
| RP41_0065K08.g1.737 | 232 | 380 | 737 | chr16 | 30619960 | <b>30619812</b> | - | 0.964286 |
| RP41_36k13TJ.745    | 66  | 149 | 745 | chr16 | 30677905 | 30677822        | - | 0.943662 |
| RP43_99b9TV.797     | 54  | 108 | 797 | chr16 | 31559064 | 31559118        | + | 1        |
| RP43_0094I07.g1.637 | 141 | 554 | 637 | chr16 | 31583959 | <b>31584372</b> | + | 0.97037  |
| RP43_99b9TJ.908     | 4   | 907 | 908 | chr16 | 31649387 | <b>31648484</b> | - | 0.985222 |
| RP43_0165G14.b1.720 | 78  | 146 | 720 | chr16 | 32433021 | 32432953        | - | 0.982759 |
| RP43_0148E12.g1.618 | 56  | 540 | 618 | chr16 | 35625482 | 35624998        | - | 1        |
| RP41_0085C03.g1.750 | 62  | 264 | 750 | chr16 | 49484271 | <b>49484473</b> | + | 0.954286 |
| RP41_0085C03.b1.701 | 394 | 487 | 701 | chr16 | 49659441 | <b>49659348</b> | - | 1        |
| CH255_102g1TJ.703   | 12  | 64  | 703 | chr16 | 52949237 | <b>52949289</b> | + | 1        |
| CH255_102g1TV.581   | 3   | 83  | 581 | chr16 | 53179276 | <b>53179196</b> | - | 1        |
| CH250_30k8TV.139    | 39  | 98  | 139 | chr16 | 62433141 | 62433200        | + | 0.939394 |
| CH250_42m9TJ.846    | 76  | 158 | 846 | chr16 | 62442138 | <b>62442220</b> | + | 0.987179 |
| CH250_30k8TJ.462    | 14  | 455 | 462 | chr16 | 62631268 | <b>62630827</b> | - | 0.893701 |
| RP41_0078D02.g1.716 | 74  | 497 | 716 | chr16 | 63231247 | <b>63231670</b> | + | 0.94822  |
| RP41_0078D02.b1.723 | 389 | 576 | 723 | chr16 | 63416165 | <b>63415978</b> | - | 0.955882 |
| RP43_0020J02.g1.644 | 34  | 259 | 644 | chr16 | 77136752 | 77136977        | + | 0.981395 |
| RP41_0051L12.g1.689 | 57  | 246 | 689 | chr17 | 21276446 | 21276257        | - | 0.961111 |

|                     |     |     |     |           |          |                 |   |          |
|---------------------|-----|-----|-----|-----------|----------|-----------------|---|----------|
| CH255_112a3TJ.935   | 687 | 875 | 935 | chr17     | 21496240 | 21496428        | + | 0.972477 |
| CH255_30I3TV.489    | 424 | 489 | 489 | chr17     | 21559176 | 21559241        | + | 1        |
| CH255_140m7TJ.828   | 449 | 534 | 828 | chr17     | 51172209 | 51172294        | + | 1        |
| CH255_131m10TV.500  | 171 | 500 | 500 | chr17     | 56704303 | <b>56704632</b> | + | 0.990066 |
| CH255_131m10TJ.426  | 138 | 410 | 426 | chr17     | 56881107 | <b>56880835</b> | - | 0.996241 |
| RP41_0095G10.g1.730 | 318 | 418 | 730 | chr17     | 59652035 | <b>59652135</b> | + | 0.952381 |
| RP41_0095G10.b1.781 | 358 | 475 | 781 | chr17     | 59852491 | <b>59852374</b> | - | 0.982456 |
| RP41_46h15TJ.305    | 235 | 302 | 305 | chr17     | 74939896 | 74939829        | - | 1        |
| RP41_0051O18.b1.775 | 136 | 185 | 775 | chr17_ran | 1737734  | 1737783         | + | 0.979592 |
| CH255_202d17TJ.652  | 1   | 57  | 652 | chr18     | 1872957  | 1873013         | + | 1        |
| CH255_12e19TV.281   | 179 | 281 | 281 | chr18     | 1938393  | 1938495         | + | 1        |
| CH255_11k17TJ.422   | 3   | 422 | 422 | chr18     | 4181134  | 4181553         | + | 0.991968 |
| RP43_126I13TV.710   | 4   | 431 | 710 | chr18     | 14337889 | 14337462        | - | 0.994975 |
| RP43_121h2TJ.771    | 605 | 771 | 771 | chr18     | 14373954 | 14373788        | - | 1        |
| RP41_10m12TV.869    | 7   | 214 | 869 | chr18     | 28665361 | 28665568        | + | 0.939759 |
| RP43_0151H01.g1.599 | 7   | 388 | 599 | chr18     | 30461128 | <b>30461509</b> | + | 0.985915 |
| RP43_0151H01.b1.706 | 263 | 312 | 706 | chr18     | 30608641 | <b>30608592</b> | - | 0.98     |
| RP43_0015D12.g1.628 | 388 | 514 | 628 | chr18     | 31557744 | 31557870        | + | 1        |
| RP43_0146E13.g1.622 | 287 | 429 | 622 | chr18     | 31639168 | 31639310        | + | 0.984252 |
| RP43_0042H03.b1.747 | 260 | 386 | 747 | chr18     | 31648648 | 31648774        | + | 0.976378 |
| CH250_69o23TV.713   | 600 | 668 | 713 | chr18     | 32745365 | <b>32745433</b> | + | 1        |
| CH250_69o23TJ.884   | 23  | 105 | 884 | chr18     | 32953250 | <b>32953168</b> | - | 0.983607 |
| CH255_234g7TJ.677   | 234 | 677 | 677 | chr18     | 47159685 | <b>47160128</b> | + | 0.997268 |
| CH255_34k4TV.719    | 350 | 719 | 719 | chr18     | 47285867 | 47285498        | - | 0.971264 |
| CH255_234g7TV.503   | 212 | 491 | 503 | chr18     | 47370071 | 47369792        | - | 0.983784 |
| CH255_12i11TV.399   | 5   | 399 | 399 | chr18     | 49704814 | <b>49705208</b> | + | 0.989529 |
| RP41_0061O18.b1.788 | 384 | 559 | 788 | chr18     | 49789665 | <b>49789840</b> | + | 0.955357 |
| CH255_12i11TJ.302   | 32  | 302 | 302 | chr18     | 49884393 | <b>49884123</b> | - | 0.986842 |
| RP41_18k21TJ.852    | 799 | 852 | 852 | chr18     | 49965079 | <b>49965026</b> | - | 1        |
| RP41_0147G19.g1.745 | 73  | 292 | 745 | chr18     | 52283997 | 52284216        | + | 0.971014 |
| RP41_0073O15.g1.706 | 316 | 455 | 706 | chr18     | 52327085 | <b>52327224</b> | + | 0.931507 |
| RP41_0147G19.b1.771 | 69  | 205 | 771 | chr18     | 52455940 | <b>52455804</b> | - | 0.916667 |
| RP41_0073O15.b1.753 | 62  | 173 | 753 | chr18     | 52496937 | 52496826        | - | 0.962963 |
| RP43_114j3TJ.567    | 4   | 231 | 567 | chr18     | 66059896 | <b>66060123</b> | + | 0.986425 |
| RP43_114j3TV.282    | 69  | 282 | 282 | chr18     | 66247280 | <b>66247067</b> | - | 0.994975 |
| RP43_0164H03.b1.706 | 458 | 572 | 706 | chr18     | 67118836 | <b>67118950</b> | + | 1        |
| RP43_0164H03.g1.608 | 41  | 211 | 608 | chr18     | 67278404 | <b>67278234</b> | - | 0.992593 |
| CH255_254m13TV.576  | 322 | 576 | 576 | chr19     | 19746410 | <b>19746664</b> | + | 0.987805 |
| CH255_268o1TV.490   | 289 | 365 | 490 | chr19     | 19937632 | <b>19937556</b> | - | 1        |
| CH255_254m13TJ.745  | 1   | 724 | 745 | chr19     | 19977943 | 19977220        | - | 0.982759 |
| CH255_268o1TJ.609   | 3   | 77  | 609 | chr19     | 20178718 | 20178644        | - | 0.972222 |
| CH255_230g7TJ.636   | 6   | 636 | 636 | chr19     | 20180405 | 20179775        | - | 0.982111 |
| CH250_24k15TV.773   | 707 | 759 | 773 | chr19     | 20781248 | 20781300        | + | 1        |
| CH255_128a9TJ.527   | 5   | 61  | 527 | chr19     | 20924092 | 20924148        | + | 1        |
| RP41_42d22TV.885    | 629 | 718 | 885 | chr19     | 21488852 | 21488941        | + | 0.955556 |
| RP41_42d22TJ.606    | 1   | 371 | 606 | chr19     | 21612649 | 21613019        | + | 0.955357 |
| CH255_130p24TJ.383  | 75  | 381 | 383 | chr19     | 21781410 | 21781104        | - | 0.986348 |
| CH255_140m10TV.822  | 302 | 379 | 822 | chr19     | 21842290 | 21842213        | - | 0.987179 |
| CH255_234k18TJ.627  | 524 | 615 | 627 | chr19     | 22238876 | 22238967        | + | 1        |
| CH255_4i8TV.295     | 4   | 295 | 295 | chr19     | 22832805 | <b>22833096</b> | + | 1        |
| CH255_32m16TV.439   | 1   | 439 | 439 | chr19     | 23120663 | <b>23120225</b> | - | 0.991892 |
| CH250_27m2TJ.343    | 1   | 133 | 343 | chr19     | 23206894 | 23206762        | - | 0.970874 |

|                     |     |     |     |       |          |                 |   |          |
|---------------------|-----|-----|-----|-------|----------|-----------------|---|----------|
| RP41_0056J07.g1.737 | 108 | 168 | 737 | chr19 | 32796639 | 32796699        | + | 0.95082  |
| RP43_98j20TV.877    | 793 | 877 | 877 | chr19 | 32898238 | 32898322        | + | 0.979592 |
| RP43_0070G08.b1.657 | 111 | 367 | 657 | chr19 | 32962045 | <b>32962301</b> | + | 0.987013 |
| RP43_98j20TJ.730    | 3   | 356 | 730 | chr19 | 33035374 | <b>33035021</b> | - | 0.987692 |
| RP43_0068B15.g1.616 | 46  | 512 | 616 | chr19 | 33095658 | 33095192        | - | 0.991501 |
| RP43_0167O05.g1.610 | 12  | 487 | 610 | chr19 | 33095694 | 33095219        | - | 0.990074 |
| RP43_0070G08.g1.645 | 4   | 160 | 645 | chr19 | 33135712 | 33135556        | - | 0.990909 |
| CH250_53p2TV.755    | 129 | 364 | 755 | chr19 | 38194135 | <b>38194370</b> | + | 0.965957 |
| CH250_53p2TJ.844    | 710 | 832 | 844 | chr19 | 38360707 | <b>38360585</b> | - | 0.964286 |
| RP43_0076L03.b1.634 | 102 | 333 | 634 | chr19 | 42572297 | 42572528        | + | 1        |
| RP43_126o24TV.290   | 1   | 113 | 290 | chr19 | 42572533 | <b>42572645</b> | + | 1        |
| RP43_126o24TJ.743   | 330 | 743 | 743 | chr19 | 42747304 | <b>42746891</b> | - | 0.992248 |
| RP43_102k22TJ.772   | 64  | 772 | 772 | chr19 | 42795509 | 42794801        | - | 1        |
| RP43_123i17TJ.650   | 588 | 650 | 650 | chr19 | 47964525 | 47964463        | - | 1        |
| RP43_123i17TV.762   | 649 | 762 | 762 | chr19 | 48203850 | 48203963        | + | 0.983607 |
| RP43_0040N21.g1.616 | 42  | 449 | 616 | chr19 | 48602357 | <b>48602764</b> | + | 0.975684 |
| RP43_0004B20.b1.682 | 119 | 453 | 682 | chr19 | 48728922 | <b>48728588</b> | - | 0.987069 |
| RP43_0040N21.b1.701 | 42  | 544 | 701 | chr19 | 48782761 | 48782259        | - | 0.995169 |
| CH250_148j3TV.691   | 75  | 310 | 691 | chr2  | 4209530  | <b>4209765</b>  | + | 0.946429 |
| RP41_0161O24.g1.688 | 52  | 130 | 688 | chr2  | 4247027  | <b>4247105</b>  | + | 0.945946 |
| CH250_148j3TJ.728   | 11  | 243 | 728 | chr2  | 4367524  | <b>4367292</b>  | - | 0.982456 |
| RP41_0053H13.g1.693 | 58  | 550 | 693 | chr2  | 4378320  | <b>4377828</b>  | - | 0.954407 |
| CH255_206b7TV.557   | 47  | 557 | 557 | chr2  | 18355218 | <b>18355728</b> | + | 0.974886 |
| CH255_206b7TJ.753   | 136 | 188 | 753 | chr2  | 18532974 | <b>18532922</b> | - | 1        |
| RP43_129i3TV.602    | 1   | 99  | 602 | chr2  | 20673540 | <b>20673638</b> | + | 1        |
| RP43_129i3TJ.615    | 14  | 613 | 615 | chr2  | 20821915 | <b>20821316</b> | - | 0.985891 |
| RP43_0153D12.b1.702 | 63  | 352 | 702 | chr2  | 28708309 | <b>28708598</b> | + | 0.992754 |
| RP43_0153D12.g1.616 | 302 | 509 | 616 | chr2  | 28900464 | <b>28900257</b> | - | 0.984615 |
| CH250_23m17TJ.506   | 245 | 328 | 506 | chr2  | 30762936 | 30763019        | + | 0.910714 |
| CH250_5a4TJ.359     | 255 | 338 | 359 | chr2  | 30762936 | 30763019        | + | 0.927536 |
| CH250_166h20TJ.650  | 1   | 123 | 650 | chr2  | 30804793 | 30804915        | + | 0.9125   |
| CH250_33m22TV.405   | 286 | 368 | 405 | chr2  | 30840988 | <b>30841070</b> | + | 1        |
| CH250_33m22TJ.847   | 434 | 631 | 847 | chr2  | 30992601 | <b>30992404</b> | - | 0.93299  |
| CH250_166h20TV.792  | 218 | 291 | 792 | chr2  | 31001600 | 31001527        | - | 0.958904 |
| RP43_0043D10.b1.726 | 377 | 427 | 726 | chr2  | 31490824 | 31490874        | + | 1        |
| RP43_0157F05.b1.701 | 188 | 626 | 701 | chr2  | 33796948 | 33797386        | + | 0.983553 |
| RP41_0078M08.b1.665 | 378 | 428 | 665 | chr2  | 47653364 | 47653314        | - | 1        |
| RP43_0034M03.b1.684 | 69  | 351 | 684 | chr2  | 53259821 | <b>53260103</b> | + | 0.985663 |
| RP43_0034M03.g1.622 | 2   | 386 | 622 | chr2  | 53387427 | <b>53387043</b> | - | 0.997167 |
| RP41_6d15TV.848     | 332 | 460 | 848 | chr2  | 55233256 | <b>55233384</b> | + | 0.953488 |
| RP41_0085G22.g1.734 | 54  | 175 | 734 | chr2  | 55435713 | <b>55435592</b> | - | 0.9      |
| CH250_93j17TV.895   | 365 | 529 | 895 | chr2  | 62483372 | 62483536        | + | 0.939394 |
| CH250_35m9TJ.555    | 164 | 263 | 555 | chr2  | 62517355 | 62517454        | + | 0.895833 |
| CH250_57n22TV.694   | 465 | 575 | 694 | chr2  | 62529197 | <b>62529307</b> | + | 0.963636 |
| CH250_37n10TJ.334   | 188 | 323 | 334 | chr2  | 62626297 | <b>62626162</b> | - | 0.980392 |
| CH250_93j17TJ.814   | 201 | 329 | 814 | chr2  | 62626297 | 62626169        | - | 0.976744 |
| CH250_35m9TV.778    | 692 | 778 | 778 | chr2  | 62662944 | 62662858        | - | 1        |
| CH250_145b11TJ.828  | 1   | 61  | 828 | chr2  | 62694440 | 62694380        | - | 1        |
| CH255_258n23TV.815  | 766 | 815 | 815 | chr2  | 63205844 | 63205893        | + | 1        |
| CH255_138m5TJ.722   | 613 | 722 | 722 | chr2  | 63245934 | 63246043        | + | 1        |
| CH255_128i9TV.820   | 636 | 724 | 820 | chr2  | 63363182 | <b>63363270</b> | + | 1        |
| CH255_258n23TJ.823  | 605 | 727 | 823 | chr2  | 63408900 | <b>63408778</b> | - | 0.991736 |

|                     |     |     |          |           |                    |          |
|---------------------|-----|-----|----------|-----------|--------------------|----------|
| CH255_138m5TV.592   | 1   | 133 | 592 chr2 | 63492552  | 63492420 -         | 0.990099 |
| CH255_128i9TJ.822   | 83  | 253 | 822 chr2 | 63586154  | 63585984 -         | 0.987578 |
| RP43_0025E22.g1.623 | 389 | 464 | 623 chr2 | 65443300  | <b>65443375</b> +  | 1        |
| RP43_0170D21.g1.617 | 52  | 477 | 617 chr2 | 65559212  | <b>65558787</b> -  | 0.985755 |
| RP43_0025E22.b1.712 | 166 | 640 | 712 chr2 | 65576087  | 65575613 -         | 0.996979 |
| CH255_26c21TV.438   | 7   | 99  | 438 chr2 | 67099826  | 67099918 +         | 1        |
| CH255_204c16TJ.740  | 518 | 740 | 740 chr2 | 67114091  | 67114313 +         | 0.990476 |
| CH255_233l21TJ.781  | 34  | 222 | 781 chr2 | 67218835  | <b>67219023</b> +  | 0.988024 |
| CH255_200b16TV.718  | 649 | 718 | 718 chr2 | 67307201  | <b>67307132</b> -  | 1        |
| CH255_233l21TV.208  | 6   | 203 | 208 chr2 | 67330161  | 67329964 -         | 0.967742 |
| CH255_204c16TV.799  | 1   | 93  | 799 chr2 | 67337566  | 67337474 -         | 1        |
| RP43_0094A01.g1.629 | 267 | 459 | 629 chr2 | 70494809  | 70495001 +         | 1        |
| RP43_101i7TV.581    | 301 | 413 | 581 chr2 | 70550884  | 70550996 +         | 1        |
| RP43_0034K03.b1.713 | 60  | 363 | 713 chr2 | 70617671  | <b>70617974</b> +  | 0.989474 |
| RP43_0094A01.b1.707 | 486 | 590 | 707 chr2 | 70676489  | <b>70676385</b> -  | 1        |
| RP43_101i7TJ.717    | 328 | 492 | 717 chr2 | 70685496  | 70685332 -         | 1        |
| RP43_0034K03.g1.626 | 43  | 469 | 626 chr2 | 70798367  | 70797941 -         | 0.993976 |
| RP41_0093J11.b1.756 | 239 | 475 | 756 chr2 | 70834595  | <b>70834831</b> +  | 0.95     |
| RP41_0093J11.g1.731 | 43  | 310 | 731 chr2 | 70883947  | <b>70883680</b> -  | 0.960474 |
| CH255_46f24TV.556   | 342 | 556 | 556 chr2 | 71176157  | 71176371 +         | 0.967213 |
| CH255_46f24TJ.678   | 4   | 678 | 678 chr2 | 71404767  | 71404093 -         | 0.994129 |
| RP41_0161L17.b1.734 | 176 | 528 | 734 chr2 | 78022075  | 78022427 +         | 0.951768 |
| RP41_0079A12.g1.759 | 67  | 311 | 759 chr2 | 79220254  | <b>79220498</b> +  | 0.952174 |
| RP41_44n2TJ.826     | 589 | 782 | 826 chr2 | 79442437  | <b>79442244</b> -  | 0.954802 |
| RP41_0054P08.b1.771 | 61  | 377 | 771 chr2 | 79506585  | 79506269 -         | 0.974603 |
| RP43_0002C21.g1.651 | 37  | 501 | 651 chr2 | 83418088  | <b>83418552</b> +  | 0.985423 |
| RP43_0002C21.b1.708 | 72  | 595 | 708 chr2 | 83580715  | <b>83580192</b> -  | 0.989583 |
| RP43_107c1TV.686    | 634 | 686 | 686 chr2 | 87463429  | 87463481 +         | 1        |
| RP41_35f19TV.862    | 295 | 383 | 862 chr2 | 95118841  | 95118929 +         | 0.966292 |
| RP41_37d4TV.903     | 552 | 612 | 903 chr2 | 100814565 | 100814625 +        | 1        |
| RP43_107c1TJ.576    | 43  | 576 | 576 chr2 | 112282928 | 112283461 +        | 0.991489 |
| CH250_150n19TJ.809  | 258 | 496 | 809 chr2 | 116963756 | <b>116963994</b> + | 0.896104 |
| CH250_150n19TV.603  | 1   | 101 | 603 chr2 | 117148102 | <b>117148002</b> - | 0.984375 |
| CH255_124g9TV.538   | 2   | 66  | 538 chr2 | 129358954 | 129359018 +        | 1        |
| CH255_265d6TV.615   | 1   | 519 | 615 chr2 | 129399256 | 129399774 +        | 0.964953 |
| CH255_250l4TJ.265   | 3   | 265 | 265 chr2 | 129458416 | 129458678 +        | 0.990826 |
| CH255_126a6TJ.845   | 32  | 147 | 845 chr2 | 129473881 | <b>129473996</b> + | 0.978495 |
| CH255_265d6TJ.624   | 423 | 624 | 624 chr2 | 129590362 | <b>129590161</b> - | 1        |
| CH255_250l4TV.390   | 3   | 388 | 390 chr2 | 129673610 | 129673225 -        | 0.980769 |
| CH255_126a6TV.785   | 481 | 696 | 785 chr2 | 129689866 | 129689651 -        | 0.985612 |
| RP43_98a16TJ.210    | 55  | 172 | 210 chr2 | 133247673 | 133247790 +        | 1        |
| CH250_77g4TV.737    | 444 | 505 | 737 chr2 | 140972595 | 140972656 +        | 1        |
| CH250_165n13TJ.830  | 111 | 160 | 830 chr2 | 140975400 | <b>140975449</b> + | 1        |
| CH250_165n13TV.891  | 516 | 604 | 891 chr2 | 141111378 | <b>141111290</b> - | 0.988764 |
| CH250_162f21TJ.846  | 563 | 677 | 846 chr2 | 142146083 | 142146197 +        | 0.964912 |
| CH250_147d12TV.877  | 797 | 877 | 877 chr2 | 142167568 | 142167648 +        | 0.911765 |
| CH250_9j16TJ.742    | 545 | 634 | 742 chr2 | 142195969 | 142196058 +        | 0.984375 |
| CH250_12d8TJ.810    | 545 | 682 | 810 chr2 | 142195969 | <b>142196106</b> + | 0.983871 |
| RP43_0151J13.b1.721 | 32  | 317 | 721 chr2 | 142199448 | <b>142199733</b> + | 0.981413 |
| CH250_86e17TJ.850   | 452 | 556 | 850 chr2 | 142337324 | <b>142337220</b> - | 1        |
| CH250_63j16TJ.736   | 51  | 143 | 736 chr2 | 142348857 | 142348765 -        | 0.964706 |
| CH250_9j16TV.534    | 3   | 95  | 534 chr2 | 142348857 | 142348765 -        | 0.953846 |



|                     |     |     |          |           |                  |   |          |
|---------------------|-----|-----|----------|-----------|------------------|---|----------|
| RP43_0070B15.g1.633 | 13  | 521 | 633 chr2 | 142355976 | <b>142355468</b> | - | 0.975962 |
| CH250_172e2TJ.844   | 142 | 275 | 844 chr2 | 143601590 | 143601723        | + | 0.984496 |
| CH250_92j13TJ.838   | 95  | 160 | 838 chr2 | 143662193 | <b>143662258</b> | + | 0.983871 |
| RP43_114h16TJ.777   | 55  | 777 | 777 chr2 | 143684971 | 143685693        | + | 0.996593 |
| CH250_172e2TV.874   | 113 | 190 | 874 chr2 | 143762549 | <b>143762472</b> | - | 1        |
| CH250_92j13TV.809   | 431 | 513 | 809 chr2 | 143811041 | 143810959        | - | 0.948052 |
| RP43_114h16TV.760   | 1   | 61  | 760 chr2 | 143880427 | 143880367        | - | 0.975    |
| RP43_0028D10.g1.623 | 4   | 460 | 623 chr2 | 155766265 | 155766721        | + | 0.98977  |
| RP43_104f13TV.892   | 13  | 427 | 892 chr2 | 155831042 | 155831456        | + | 0.994505 |
| RP43_126o23TV.877   | 1   | 414 | 877 chr2 | 155831043 | 155831456        | + | 0.991935 |
| RP43_104h21TV.533   | 5   | 333 | 533 chr2 | 155831128 | <b>155831456</b> | + | 0.996689 |
| RP43_104h21TJ.834   | 54  | 222 | 834 chr2 | 155953467 | <b>155953299</b> | - | 0.993421 |
| RP43_104f13TJ.910   | 5   | 223 | 910 chr2 | 155953517 | 155953299        | - | 0.994624 |
| CH250_58d2TV.778    | 117 | 341 | 778 chr2 | 157252907 | 157253131        | + | 0.941964 |
| CH255_34I22TV.785   | 6   | 708 | 785 chr2 | 158998386 | 158997684        | - | 0.987013 |
| RP41_43e14TV.872    | 590 | 746 | 872 chr2 | 162135396 | <b>162135552</b> | + | 0.986928 |
| RP41_43e14TJ.636    | 496 | 612 | 636 chr2 | 162300375 | <b>162300259</b> | - | 0.974359 |
| CH255_113g20TJ.552  | 6   | 552 | 552 chr2 | 163557697 | <b>163558243</b> | + | 0.990741 |
| CH255_113g20TV.764  | 257 | 764 | 764 chr2 | 163770904 | <b>163770397</b> | - | 0.986413 |
| RP41_0092A05.g1.693 | 266 | 461 | 693 chr2 | 167445212 | 167445017        | - | 0.9125   |
| RP43_0086H24.g1.568 | 4   | 297 | 568 chr2 | 182090556 | <b>182090849</b> | + | 0.991071 |
| RP43_0086H24.b1.660 | 73  | 576 | 660 chr2 | 182268421 | <b>182267918</b> | - | 0.992063 |
| CH255_230i15TJ.476  | 128 | 190 | 476 chr2 | 188680547 | 188680609        | + | 1        |
| CH255_241k9TV.536   | 55  | 252 | 536 chr2 | 188691649 | 188691846        | + | 0.994318 |
| CH255_37o13TJ.477   | 96  | 200 | 477 chr2 | 188692607 | 188692711        | + | 1        |
| CH255_38j19TJ.921   | 664 | 921 | 921 chr2 | 188756059 | <b>188756316</b> | + | 1        |
| CH255_230i15TV.261  | 2   | 235 | 261 chr2 | 188894614 | <b>188894381</b> | - | 0.992481 |
| CH255_37o13TV.538   | 4   | 146 | 538 chr2 | 188932530 | 188932388        | - | 1        |
| CH255_38j19TV.357   | 4   | 63  | 357 chr2 | 188942305 | 188942246        | - | 0.980769 |
| CH255_31p19TJ.119   | 55  | 119 | 119 chr2 | 194378436 | 194378500        | + | 1        |
| CH255_240d2TV.754   | 376 | 454 | 754 chr2 | 194495309 | 194495387        | + | 1        |
| CH255_242a20TV.764  | 5   | 160 | 764 chr2 | 200338533 | 200338378        | - | 1        |
| RP43_0052B04.g1.666 | 5   | 580 | 666 chr2 | 209388653 | 209388078        | - | 0.994536 |
| RP43_0017G20.b1.731 | 78  | 589 | 731 chr2 | 209388663 | 209388152        | - | 0.995098 |
| RP43_107p6TJ.883    | 68  | 883 | 883 chr2 | 211271103 | <b>211271918</b> | + | 0.995816 |
| RP43_107p6TV.667    | 46  | 667 | 667 chr2 | 211453092 | <b>211452471</b> | - | 0.985663 |
| CH255_264I9TJ.261   | 2   | 261 | 261 chr2 | 214486152 | 214486411        | + | 0.987013 |
| CH255_235j12TV.582  | 393 | 581 | 582 chr2 | 214495836 | 214496024        | + | 0.979798 |
| CH255_130a11TJ.800  | 520 | 588 | 800 chr2 | 214504465 | <b>214504533</b> | + | 1        |
| CH250_89m17TJ.850   | 455 | 748 | 850 chr2 | 214618761 | 214618468        | - | 0.963504 |
| CH255_264I9TV.844   | 725 | 819 | 844 chr2 | 214677141 | <b>214677047</b> | - | 1        |
| CH255_130a11TV.577  | 2   | 334 | 577 chr2 | 214760434 | 214760102        | - | 0.993289 |
| RP43_132e3TJ.797    | 452 | 797 | 797 chr2 | 215774885 | 215775230        | + | 1        |
| RP43_0019M14.g1.634 | 6   | 212 | 634 chr2 | 215826187 | <b>215826393</b> | + | 0.98995  |
| RP43_132e3TV.789    | 375 | 789 | 789 chr2 | 215954325 | <b>215953911</b> | - | 0.995169 |
| RP43_0019M14.b1.705 | 77  | 522 | 705 chr2 | 216015813 | 216015368        | - | 0.993266 |
| CH255_197a16TJ.612  | 1   | 612 | 612 chr2 | 217187048 | 217187659        | + | 0.987654 |
| RP41_0058L04.b1.732 | 31  | 136 | 732 chr2 | 232323423 | 232323318        | - | 0.978261 |
| RP41_0167B03.b1.740 | 301 | 424 | 740 chr2 | 234433376 | <b>234433499</b> | + | 0.960526 |
| RP41_0052O01.g1.698 | 417 | 488 | 698 chr2 | 234547177 | <b>234547106</b> | - | 1        |
| RP41_0081F24.b1.766 | 418 | 494 | 766 chr2 | 234615221 | 234615145        | - | 0.971429 |
| RP41_0167B03.g1.705 | 377 | 483 | 705 chr2 | 234615523 | 234615417        | - | 1        |

|                     |     |     |           |           |                   |          |
|---------------------|-----|-----|-----------|-----------|-------------------|----------|
| RP41_0155I17.b1.795 | 263 | 354 | 795 chr2  | 239262590 | 239262499 -       | 0.967391 |
| RP43_0005M23.g1.634 | 43  | 359 | 634 chr20 | 5825841   | <b>5826157</b> +  | 0.990536 |
| RP43_0005M23.b1.691 | 36  | 287 | 691 chr20 | 6012147   | <b>6011896</b> -  | 0.986784 |
| CH250_7a3TJ.657     | 1   | 69  | 657 chr20 | 8343321   | 8343389 +         | 0.981818 |
| CH250_164i18TV.888  | 631 | 771 | 888 chr20 | 8405727   | <b>8405867</b> +  | 0.976562 |
| CH250_7a3TV.376     | 47  | 325 | 376 chr20 | 8522426   | <b>8522148</b> -  | 0.917603 |
| CH250_164i18TJ.867  | 6   | 675 | 867 chr20 | 8584501   | 8583832 -         | 0.96124  |
| CH255_130p24TV.417  | 101 | 157 | 417 chr20 | 30759046  | 30758990 -        | 1        |
| CH255_270g5TV.283   | 1   | 216 | 283 chr20 | 33257385  | 33257600 +        | 0.988701 |
| RP43_127k10TJ.423   | 1   | 423 | 423 chr20 | 33307731  | 33308153 +        | 0.996785 |
| CH255_140a21TJ.827  | 373 | 430 | 827 chr20 | 33340504  | <b>33340561</b> + | 1        |
| RP43_0092G08.g1.613 | 3   | 485 | 613 chr20 | 33341457  | 33341939 +        | 1        |
| CH255_270g5TJ.245   | 159 | 245 | 245 chr20 | 33481423  | <b>33481337</b> - | 1        |
| CH255_140a21TV.799  | 232 | 799 | 799 chr20 | 33493876  | 33493309 -        | 0.991131 |
| RP43_0019B06.b1.650 | 100 | 351 | 650 chr20 | 35194944  | <b>35195195</b> + | 0.985507 |
| RP43_0019B06.g1.642 | 1   | 95  | 642 chr20 | 35349366  | <b>35349272</b> - | 1        |
| RP41_0072B10.g1.708 | 95  | 569 | 708 chr20 | 44129922  | <b>44130396</b> + | 0.949405 |
| RP41_0072B10.b1.715 | 72  | 160 | 715 chr20 | 44331571  | <b>44331483</b> - | 0.988372 |
| CH250_175o11TV.874  | 38  | 825 | 874 chr21 | 10043346  | 10042559 -        | 0.957447 |
| CH250_53a14TJ.859   | 681 | 788 | 859 chr21 | 13694562  | 13694455 -        | 0.97     |
| RP43_104I13TJ.503   | 286 | 490 | 503 chr21 | 14163082  | 14162878 -        | 0.970297 |
| RP43_107f14TV.653   | 549 | 652 | 653 chr21 | 14266889  | 14266786 -        | 1        |
| RP43_119e10TJ.443   | 50  | 142 | 443 chr21 | 14294315  | 14294223 -        | 0.916667 |
| CH255_114e13TV.678  | 541 | 612 | 678 chr21 | 14398067  | 14398138 +        | 0.982143 |
| CH255_119e17TV.776  | 568 | 629 | 776 chr21 | 14728869  | 14728930 +        | 0.981818 |
| CH255_223j11TJ.646  | 560 | 646 | 646 chr21 | 14753089  | 14753175 +        | 1        |
| CH255_126I9TJ.838   | 564 | 815 | 838 chr21 | 14796449  | <b>14796700</b> + | 1        |
| CH255_119e17TJ.716  | 4   | 714 | 716 chr21 | 14912801  | <b>14912091</b> - | 0.987868 |
| CH255_236o1TJ.822   | 771 | 822 | 822 chr21 | 14936834  | 14936783 -        | 1        |
| CH255_223j11TV.816  | 5   | 816 | 816 chr21 | 14950051  | 14949240 -        | 0.987382 |
| CH255_126I9TV.784   | 5   | 403 | 784 chr21 | 15022168  | 15021770 -        | 0.98939  |
| CH250_162b3TJ.777   | 172 | 643 | 777 chr21 | 15639458  | <b>15639929</b> + | 0.942308 |
| CH250_162b3TV.855   | 237 | 855 | 855 chr21 | 15802932  | <b>15802314</b> - | 0.936535 |
| CH255_102d21TJ.825  | 4   | 57  | 825 chr21 | 23393882  | 23393935 +        | 1        |
| CH255_102d21TV.901  | 1   | 901 | 901 chr21 | 23620677  | 23619777 -        | 0.983226 |
| RP43_0084L24.b1.698 | 139 | 206 | 698 chr21 | 26150015  | 26149948 -        | 1        |
| RP41_0072P21.b1.761 | 69  | 368 | 761 chr21 | 26500879  | <b>26501178</b> + | 0.951049 |
| RP41_0072P21.g1.726 | 392 | 487 | 726 chr21 | 26717222  | <b>26717127</b> - | 0.951613 |
| CH255_256f22TV.836  | 7   | 449 | 836 chr21 | 27389208  | <b>27389650</b> + | 0.985258 |
| CH255_235h7TJ.306   | 228 | 295 | 306 chr21 | 27528589  | <b>27528522</b> - | 0.967742 |
| CH255_4b20TJ.206    | 7   | 114 | 206 chr21 | 27582842  | 27582735 -        | 0.984848 |
| CH255_256f22TJ.841  | 588 | 841 | 841 chr21 | 27584866  | 27584613 -        | 0.990783 |
| CH255_266f13TJ.771  | 1   | 761 | 771 chr21 | 27586673  | 27585913 -        | 0.989164 |
| CH255_100g8TV.225   | 5   | 102 | 225 chr21 | 35445505  | 35445602 +        | 1        |
| CH255_223m20TV.624  | 190 | 624 | 624 chr21 | 35622261  | 35622695 +        | 0.989362 |
| CH255_223m20TJ.628  | 460 | 628 | 628 chr21 | 35848198  | 35848030 -        | 1        |
| RP43_116e9TV.741    | 642 | 711 | 741 chr21 | 36180734  | 36180665 -        | 1        |
| CH250_24i18TJ.751   | 45  | 192 | 751 chr22 | 14684818  | 14684671 -        | 0.954198 |
| RP43_0173I23.b1.696 | 424 | 633 | 696 chr22 | 15714746  | 15714537 -        | 0.984848 |
| RP41_12e9TJ.732     | 2   | 106 | 732 chr22 | 15768694  | 15768590 -        | 0.946667 |
| RP41_0051M03.b1.769 | 76  | 513 | 769 chr22 | 29055078  | 29055515 +        | 0.970027 |
| RP41_0167D14.b1.759 | 70  | 560 | 759 chr22 | 29118350  | 29118840 +        | 0.969492 |

|                     |     |     |           |           |                    |          |
|---------------------|-----|-----|-----------|-----------|--------------------|----------|
| RP41_0149P02.b1.763 | 43  | 273 | 763 chr22 | 29220775  | <b>29221005</b> +  | 0.926108 |
| RP41_0167D14.g1.738 | 307 | 484 | 738 chr22 | 29312015  | <b>29311838</b> -  | 0.967391 |
| RP41_20g16TV.845    | 4   | 82  | 845 chr3  | 6494798   | 6494720 -          | 1        |
| CH250_27g9TJ.502    | 355 | 409 | 502 chr3  | 9543268   | 9543322 +          | 1        |
| RP41_22f21TJ.484    | 3   | 131 | 484 chr3  | 12891296  | 12891168 -         | 0.962963 |
| RP43_0054I17.b1.727 | 81  | 585 | 727 chr3  | 13413391  | <b>13413895</b> +  | 0.992386 |
| RP43_0054I17.g1.626 | 316 | 569 | 626 chr3  | 13581979  | <b>13581726</b> -  | 1        |
| RP43_127c4TV.766    | 464 | 766 | 766 chr3  | 19460731  | <b>19461033</b> +  | 0.994253 |
| RP43_127c4TJ.862    | 3   | 862 | 862 chr3  | 19603992  | <b>19603133</b> -  | 0.991525 |
| RP43_0080I06.g1.653 | 4   | 574 | 653 chr3  | 19659345  | 19658775 -         | 0.982843 |
| RP43_133h13TV.245   | 1   | 242 | 245 chr3  | 39284395  | <b>39284636</b> +  | 1        |
| RP43_133h13TJ.746   | 647 | 700 | 746 chr3  | 39452344  | <b>39452291</b> -  | 1        |
| RP41_0068C09.g1.690 | 57  | 146 | 690 chr3  | 51535003  | 51535092 +         | 1        |
| RP41_0075M07.b1.686 | 52  | 186 | 686 chr3  | 51858504  | 51858370 -         | 0.980583 |
| CH255_222k23TJ.812  | 48  | 175 | 812 chr3  | 58769898  | <b>58770025</b> +  | 1        |
| CH255_222k23TV.852  | 3   | 392 | 852 chr3  | 58971338  | <b>58970949</b> -  | 0.994269 |
| RP41_0078M07.g1.749 | 321 | 485 | 749 chr3  | 66464319  | <b>66464483</b> +  | 0.979381 |
| RP41_0078M07.b1.659 | 1   | 384 | 659 chr3  | 66644875  | <b>66644492</b> -  | 0.928205 |
| CH255_246p15TJ.849  | 168 | 846 | 849 chr3  | 74029427  | 74030105 +         | 0.98     |
| CH255_143I23TJ.853  | 62  | 853 | 853 chr3  | 74041330  | 74042121 +         | 0.986684 |
| CH255_206k3TV.676   | 588 | 676 | 676 chr3  | 74059181  | 74059269 +         | 1        |
| CH255_214f22TJ.534  | 168 | 534 | 534 chr3  | 74068726  | <b>74069092</b> +  | 0.985019 |
| CH255_246p15TV.640  | 292 | 640 | 640 chr3  | 74214996  | <b>74214648</b> -  | 0.986928 |
| CH255_143I23TV.809  | 1   | 808 | 809 chr3  | 74230704  | 74229897 -         | 0.987887 |
| CH255_206k3TJ.749   | 20  | 749 | 749 chr3  | 74237089  | 74236360 -         | 0.98928  |
| CH255_214f22TV.417  | 353 | 417 | 417 chr3  | 74302426  | 74302362 -         | 1        |
| CH255_112e2TV.570   | 2   | 570 | 570 chr3  | 75171690  | 75172258 +         | 0.983516 |
| RP43_103d7TV.593    | 291 | 391 | 593 chr3  | 75362065  | 75361965 -         | 0.989899 |
| CH255_198p6TV.476   | 160 | 233 | 476 chr3  | 75400670  | 75400743 +         | 1        |
| RP43_0019L04.b1.722 | 28  | 193 | 722 chr3  | 87680192  | 87680357 +         | 0.978571 |
| RP43_0164D05.b1.729 | 77  | 243 | 729 chr3  | 87694765  | <b>87694931</b> +  | 0.981818 |
| RP43_0019L04.g1.660 | 259 | 478 | 660 chr3  | 87858753  | <b>87858534</b> -  | 0.987654 |
| RP43_0164D05.g1.628 | 5   | 268 | 628 chr3  | 87865193  | 87864930 -         | 0.988281 |
| RP43_109d22TV.648   | 6   | 648 | 648 chr3  | 88065318  | 88065960 +         | 0.991753 |
| RP43_0014E15.b1.710 | 59  | 519 | 710 chr3  | 88115666  | <b>88116126</b> +  | 0.992683 |
| RP43_0157E06.g1.615 | 52  | 526 | 615 chr3  | 88227512  | <b>88227038</b> -  | 0.98645  |
| RP43_0014E15.g1.635 | 451 | 511 | 635 chr3  | 88276756  | 88276696 -         | 1        |
| RP43_0012H11.g1.647 | 1   | 493 | 647 chr3  | 95338659  | <b>95339151</b> +  | 0.995157 |
| RP43_0012H11.b1.700 | 373 | 545 | 700 chr3  | 95522895  | <b>95522723</b> -  | 0.983471 |
| CH255_268j11TV.815  | 637 | 741 | 815 chr3  | 96167351  | 96167455 +         | 0.984615 |
| CH250_158j15TJ.860  | 123 | 297 | 860 chr3  | 104195145 | 104195319 +        | 0.940828 |
| RP41_6f20TJ.786     | 512 | 785 | 786 chr3  | 104287292 | 104287019 -        | 0.955975 |
| CH255_37a8TV.614    | 22  | 200 | 614 chr3  | 107868411 | 107868589 +        | 0.987879 |
| CH255_134I15TV.152  | 1   | 152 | 152 chr3  | 107891268 | 107891419 +        | 1        |
| CH255_265c11TJ.569  | 1   | 197 | 569 chr3  | 107934782 | 107934978 +        | 0.989848 |
| CH255_223i5TJ.739   | 450 | 513 | 739 chr3  | 108004055 | 108004118 +        | 1        |
| CH255_16m13TJ.276   | 217 | 276 | 276 chr3  | 108027333 | 108027392 +        | 1        |
| CH255_222m6TJ.696   | 543 | 694 | 696 chr3  | 108072497 | <b>108072648</b> + | 0.981481 |
| CH255_37a8TJ.648    | 3   | 648 | 648 chr3  | 108092019 | <b>108091374</b> - | 0.988571 |
| CH255_115m16TJ.786  | 111 | 210 | 786 chr3  | 108124764 | 108124665 -        | 0.99     |
| CH255_134I15TJ.770  | 1   | 58  | 770 chr3  | 108149396 | 108149339 -        | 1        |
| CH255_229n7TV.804   | 332 | 804 | 804 chr3  | 108166656 | 108166184 -        | 0.982609 |

|                     |     |     |          |           |                    |          |
|---------------------|-----|-----|----------|-----------|--------------------|----------|
| CH255_265c11TV.555  | 149 | 555 | 555 chr3 | 108169557 | 108169151 -        | 0.985119 |
| CH255_223i5TV.860   | 1   | 692 | 860 chr3 | 108223257 | 108222566 -        | 0.986641 |
| CH255_16m13TV.277   | 8   | 276 | 277 chr3 | 108270717 | 108270449 -        | 0.979021 |
| CH255_134p19TV.513  | 1   | 493 | 513 chr3 | 108276099 | 108275607 -        | 0.984556 |
| CH255_222m6TV.694   | 1   | 694 | 694 chr3 | 108276101 | 108275408 -        | 0.984155 |
| CH255_259h24TV.753  | 25  | 138 | 753 chr3 | 121474571 | 121474684 +        | 1        |
| CH255_40e7TV.268    | 100 | 268 | 268 chr3 | 121552299 | <b>121552467</b> + | 0.992806 |
| CH255_222b1TV.715   | 261 | 347 | 715 chr3 | 121672801 | <b>121672715</b> - | 0.988506 |
| CH255_259h24TJ.837  | 725 | 837 | 837 chr3 | 121682881 | 121682769 -        | 1        |
| CH255_253a6TJ.364   | 1   | 173 | 364 chr3 | 121734626 | 121734454 -        | 1        |
| CH255_40e7TJ.448    | 44  | 178 | 448 chr3 | 121767196 | 121767062 -        | 0.984    |
| RP43_0030P05.b1.712 | 74  | 543 | 712 chr3 | 123377660 | <b>123378129</b> + | 0.992    |
| RP43_0030P05.g1.613 | 48  | 164 | 613 chr3 | 123413539 | <b>123413423</b> - | 0.977528 |
| CH250_146n12TJ.835  | 327 | 777 | 835 chr3 | 130337767 | 130338217 +        | 0.967517 |
| CH250_76e22TV.856   | 340 | 775 | 856 chr3 | 130433762 | <b>130434197</b> + | 0.955399 |
| CH250_76e22TJ.761   | 191 | 555 | 761 chr3 | 130587535 | <b>130587171</b> - | 0.950413 |
| RP43_135e8TV.601    | 536 | 601 | 601 chr3 | 131033097 | 131033162 +        | 1        |
| RP41_0149I04.g1.705 | 88  | 141 | 705 chr3 | 141286604 | 141286657 +        | 0.981481 |
| CH250_159p20TV.823  | 175 | 277 | 823 chr3 | 145673869 | <b>145673971</b> + | 0.941748 |
| CH250_159p20TJ.856  | 628 | 785 | 856 chr3 | 145804401 | <b>145804244</b> - | 0.965517 |
| CH250_71h12TJ.813   | 32  | 199 | 813 chr3 | 145959638 | 145959471 -        | 0.96732  |
| CH255_16I5TV.214    | 1   | 53  | 214 chr3 | 147315214 | 147315162 -        | 1        |
| RP41_0092E09.b1.758 | 122 | 584 | 758 chr3 | 147416412 | 147416874 +        | 0.946429 |
| CH255_104d1TV.690   | 40  | 690 | 690 chr3 | 147472868 | 147472218 -        | 0.993243 |
| CH255_12I18TV.302   | 5   | 302 | 302 chr3 | 150060820 | <b>150061117</b> + | 0.995238 |
| CH255_12I18TJ.246   | 37  | 246 | 246 chr3 | 150291864 | <b>150291655</b> - | 0.97561  |
| CH255_234I7TV.610   | 471 | 610 | 610 chr3 | 150354193 | 150354054 -        | 0.987805 |
| CH250_35j16TV.735   | 1   | 106 | 735 chr3 | 151947609 | 151947504 -        | 0.975    |
| CH250_80e20TV.805   | 88  | 260 | 805 chr3 | 151994280 | 151994108 -        | 0.952381 |
| CH255_131p18TV.622  | 225 | 448 | 622 chr3 | 152362973 | 152363196 +        | 0.986301 |
| CH255_131j12TV.611  | 2   | 435 | 611 chr3 | 152418578 | 152419011 +        | 0.992443 |
| CH255_142n2TV.796   | 4   | 180 | 796 chr3 | 152498466 | 152498642 +        | 0.986928 |
| CH255_131j12TJ.176  | 4   | 151 | 176 chr3 | 152635134 | 152634987 -        | 0.978261 |
| CH250_156o15TV.851  | 27  | 445 | 851 chr3 | 156211009 | <b>156211427</b> + | 0.974619 |
| CH250_156o15TJ.845  | 67  | 131 | 845 chr3 | 156353601 | <b>156353537</b> - | 0.966667 |
| CH250_146d6TJ.865   | 611 | 786 | 865 chr3 | 156412771 | 156412596 -        | 0.927835 |
| CH250_49I14TJ.840   | 605 | 801 | 840 chr3 | 156476220 | 156476024 -        | 0.952381 |
| RP41_0070D05.b1.760 | 52  | 130 | 760 chr3 | 162404418 | 162404340 -        | 0.985075 |
| RP43_0016I06.b1.719 | 71  | 349 | 719 chr3 | 163668651 | 163668929 +        | 0.974545 |
| RP43_101I22TV.831   | 142 | 831 | 831 chr3 | 163735917 | <b>163736606</b> + | 0.991379 |
| RP43_0016I06.g1.638 | 41  | 434 | 638 chr3 | 163848196 | <b>163847803</b> - | 0.994413 |
| RP43_101I22TJ.916   | 1   | 916 | 916 chr3 | 163884896 | 163883981 -        | 0.993065 |
| RP41_0147H17.g1.737 | 72  | 326 | 737 chr3 | 164111360 | 164111614 +        | 0.963855 |
| RP41_5f12TV.806     | 108 | 302 | 806 chr3 | 166402164 | <b>166402358</b> + | 0.941799 |
| RP41_5f12TJ.531     | 457 | 528 | 531 chr3 | 166573735 | <b>166573664</b> - | 1        |
| RP41_31k22TJ.861    | 645 | 721 | 861 chr3 | 166604691 | 166604615 -        | 0.935065 |
| RP41_0092B01.b1.774 | 133 | 539 | 774 chr3 | 167615616 | 167615210 -        | 0.94306  |
| RP41_0072O21.b1.734 | 368 | 462 | 734 chr3 | 171311118 | <b>171311212</b> + | 0.975904 |
| RP41_0072O21.g1.712 | 310 | 548 | 712 chr3 | 171487517 | <b>171487279</b> - | 0.981366 |
| CH250_35i8TV.589    | 462 | 589 | 589 chr3 | 184329634 | <b>184329761</b> + | 0.96875  |
| CH250_35i8TJ.784    | 189 | 304 | 784 chr3 | 184485473 | <b>184485358</b> - | 0.974138 |
| CH250_171d9TV.861   | 711 | 861 | 861 chr3 | 184663076 | 184662926 -        | 0.969388 |

|                     |     |     |     |      |           |                  |   |          |
|---------------------|-----|-----|-----|------|-----------|------------------|---|----------|
| RP41_0095D21.g1.741 | 216 | 478 | 741 | chr3 | 194755745 | <b>194756007</b> | + | 0.954887 |
| RP41_0095D21.b1.760 | 66  | 586 | 760 | chr3 | 194956351 | <b>194955831</b> | - | 0.978852 |
| CH250_167I16TV.766  | 135 | 257 | 766 | chr3 | 199022450 | 199022572        | + | 0.966942 |
| CH255_140m10TJ.852  | 467 | 529 | 852 | chr4 | 357377    | 357439           | + | 0.984127 |
| RP41_0149N24.g1.730 | 45  | 223 | 730 | chr4 | 8104509   | 8104687          | + | 0.911765 |
| RP43_0168N15.b1.716 | 395 | 591 | 716 | chr4 | 9369950   | 9369754          | - | 0.987179 |
| CH255_12j19TV.136   | 1   | 136 | 136 | chr4 | 16640503  | 16640638         | + | 1        |
| CH255_142I19TV.182  | 4   | 182 | 182 | chr4 | 16728935  | <b>16729113</b>  | + | 0.992701 |
| CH255_12j19TJ.111   | 1   | 111 | 111 | chr4 | 16902323  | <b>16902213</b>  | - | 0.916667 |
| CH255_142I19TJ.350  | 9   | 350 | 350 | chr4 | 16975297  | 16974956         | - | 0.97619  |
| RP43_102o20TV.603   | 554 | 603 | 603 | chr4 | 47261616  | <b>47261665</b>  | + | 1        |
| RP43_0084I05.b1.700 | 64  | 518 | 700 | chr4 | 47347087  | <b>47346633</b>  | - | 0.995169 |
| RP43_102o20TJ.650   | 4   | 266 | 650 | chr4 | 47384409  | 47384147         | - | 0.995671 |
| RP43_0005I06.b1.618 | 108 | 232 | 618 | chr4 | 47398889  | 47398765         | - | 0.982301 |
| RP43_125g1TV.761    | 70  | 277 | 761 | chr4 | 47547105  | 47547312         | + | 0.975962 |
| RP43_0150O18.b1.725 | 319 | 553 | 725 | chr4 | 47586710  | 47586944         | + | 0.985294 |
| RP43_134o19TV.825   | 370 | 823 | 825 | chr4 | 47671567  | <b>47672020</b>  | + | 0.994737 |
| RP43_125g1TJ.565    | 45  | 565 | 565 | chr4 | 47706012  | <b>47705492</b>  | - | 0.991404 |
| RP43_0150O18.g1.631 | 492 | 552 | 631 | chr4 | 47711364  | 47711304         | - | 1        |
| RP43_0068F21.g1.608 | 254 | 454 | 608 | chr4 | 47755053  | 47754853         | - | 1        |
| RP43_134o19TJ.708   | 1   | 708 | 708 | chr4 | 47825736  | 47825029         | - | 0.992793 |
| RP41_0082E19.b1.723 | 107 | 516 | 723 | chr4 | 55225856  | 55226265         | + | 0.954545 |
| CH250_163p8TV.889   | 742 | 822 | 889 | chr4 | 57464924  | 57465004         | + | 0.973333 |
| CH250_45a22TJ.615   | 1   | 263 | 615 | chr4 | 65396667  | <b>65396929</b>  | + | 0.901288 |
| CH250_17h22TJ.868   | 36  | 316 | 868 | chr4 | 65451492  | <b>65451212</b>  | - | 0.946058 |
| CH250_45a22TV.835   | 304 | 388 | 835 | chr4 | 65547959  | 65547875         | - | 0.952941 |
| RP41_0055B22.b1.775 | 247 | 369 | 775 | chr4 | 69109781  | 69109903         | + | 0.95935  |
| RP41_46n6TJ.839     | 509 | 731 | 839 | chr4 | 69118120  | 69118342         | + | 0.957944 |
| RP41_0058L04.g1.738 | 340 | 625 | 738 | chr4 | 69142310  | <b>69142595</b>  | + | 0.958904 |
| RP41_46n6TV.858     | 686 | 747 | 858 | chr4 | 69284846  | <b>69284785</b>  | - | 0.965517 |
| RP41_0063O23.b1.740 | 92  | 166 | 740 | chr4 | 69766811  | 69766737         | - | 0.973333 |
| RP43_101f11TJ.684   | 269 | 495 | 684 | chr4 | 72831043  | 72831269         | + | 1        |
| RP43_0164L02.g1.606 | 249 | 473 | 606 | chr4 | 72944918  | <b>72945142</b>  | + | 0.98895  |
| RP43_107e14TJ.841   | 21  | 196 | 841 | chr4 | 73097454  | <b>73097279</b>  | - | 0.992593 |
| RP43_0164L02.b1.696 | 383 | 520 | 696 | chr4 | 73109699  | 73109562         | - | 1        |
| CH255_102c12TV.944  | 707 | 794 | 944 | chr4 | 89108759  | 89108846         | + | 1        |
| CH255_204g22TJ.682  | 182 | 278 | 682 | chr4 | 89142965  | 89143061         | + | 1        |
| CH255_144o12TJ.336  | 4   | 215 | 336 | chr4 | 89306643  | <b>89306854</b>  | + | 0.981132 |
| CH255_204g22TV.720  | 1   | 321 | 720 | chr4 | 89327927  | <b>89327607</b>  | - | 0.992481 |
| CH255_22d12TJ.386   | 325 | 386 | 386 | chr4 | 89342222  | 89342161         | - | 1        |
| CH255_102c12TJ.429  | 1   | 93  | 429 | chr4 | 89343063  | 89342971         | - | 1        |
| CH255_262m24TJ.526  | 19  | 107 | 526 | chr4 | 89392017  | 89391929         | - | 0.986111 |
| RP43_0166F19.b1.685 | 21  | 134 | 685 | chr4 | 102607783 | 102607896        | + | 1        |
| CH250_83i12TJ.755   | 452 | 507 | 755 | chr4 | 105183806 | 105183861        | + | 0.982143 |
| CH250_5f18TJ.674    | 568 | 658 | 674 | chr4 | 105268047 | 105268137        | + | 0.95122  |
| CH255_262i13TV.697  | 513 | 624 | 697 | chr4 | 108731530 | 108731641        | + | 1        |
| CH255_254p6TV.812   | 4   | 78  | 812 | chr4 | 108803959 | 108804033        | + | 1        |
| CH255_254p6TJ.832   | 741 | 797 | 832 | chr4 | 109001444 | 109001388        | - | 1        |
| CH255_130a16TJ.613  | 1   | 609 | 613 | chr4 | 114939241 | 114939849        | + | 0.979021 |
| CH255_32i15TJ.534   | 5   | 77  | 534 | chr4 | 114963234 | <b>114963306</b> | + | 1        |
| CH255_130a16TV.363  | 43  | 363 | 363 | chr4 | 115142529 | <b>115142209</b> | - | 0.985019 |
| CH255_32i15TV.268   | 5   | 268 | 268 | chr4 | 115230041 | 115229778        | - | 0.994845 |



|                     |     |     |     |      |           |                  |   |          |
|---------------------|-----|-----|-----|------|-----------|------------------|---|----------|
| RP41_0072L13.g1.713 | 73  | 305 | 713 | chr4 | 117015531 | <b>117015763</b> | + | 0.914027 |
| RP41_0072L13.b1.729 | 370 | 470 | 729 | chr4 | 117176081 | <b>117175981</b> | - | 0.967742 |
| RP43_0084E08.b1.717 | 69  | 578 | 717 | chr4 | 117269781 | 117270290        | + | 0.993039 |
| RP43_0001I21.g1.664 | 38  | 327 | 664 | chr4 | 117341952 | <b>117342241</b> | + | 0.989362 |
| RP43_0084E08.g1.643 | 4   | 151 | 643 | chr4 | 117419818 | <b>117419671</b> | - | 0.986111 |
| RP43_0001I21.b1.711 | 77  | 425 | 711 | chr4 | 117539050 | 117538702        | - | 0.972308 |
| RP41_2j22TV.880     | 347 | 639 | 880 | chr4 | 120133911 | 120134203        | + | 0.976109 |
| RP43_0086O05.b1.649 | 76  | 185 | 649 | chr4 | 120799106 | 120798997        | - | 0.990654 |
| CH255_46g6TJ.807    | 6   | 273 | 807 | chr4 | 127399530 | 127399797        | + | 1        |
| CH255_8o4TV.539     | 46  | 539 | 539 | chr4 | 127479789 | <b>127480282</b> | + | 0.977041 |
| CH255_46g6TV.745    | 238 | 745 | 745 | chr4 | 127624447 | <b>127623940</b> | - | 0.978339 |
| CH255_8o4TJ.428     | 4   | 428 | 428 | chr4 | 127662777 | 127662353        | - | 0.980707 |
| CH255_227d16TJ.845  | 2   | 843 | 845 | chr4 | 127754384 | 127755225        | + | 0.982484 |
| CH255_196h23TJ.859  | 4   | 186 | 859 | chr4 | 127834657 | 127834839        | + | 0.993377 |
| CH255_198b5TV.305   | 4   | 131 | 305 | chr4 | 127834712 | <b>127834839</b> | + | 1        |
| CH255_227d16TV.740  | 664 | 740 | 740 | chr4 | 127911790 | <b>127911714</b> | - | 1        |
| CH255_198b5TJ.762   | 1   | 217 | 762 | chr4 | 128055917 | 128055701        | - | 0.972678 |
| CH250_158h15TJ.800  | 2   | 84  | 800 | chr4 | 129306674 | <b>129306756</b> | + | 0.979592 |
| RP41_0055D07.b1.769 | 406 | 496 | 769 | chr4 | 129449914 | 129449824        | - | 1        |
| CH250_158h15TV.887  | 402 | 500 | 887 | chr4 | 129449922 | <b>129449824</b> | - | 0.968421 |
| RP41_35i12TJ.873    | 519 | 606 | 873 | chr4 | 129549058 | 129548971        | - | 0.953488 |
| RP41_0052L15.b1.745 | 223 | 280 | 745 | chr4 | 129558106 | 129558049        | - | 0.982759 |
| CH250_15g22TJ.690   | 459 | 671 | 690 | chr4 | 142210600 | 142210812        | + | 0.986111 |
| CH255_241h10TV.725  | 351 | 400 | 725 | chr4 | 155306974 | 155307023        | + | 1        |
| CH255_234e3TJ.539   | 325 | 539 | 539 | chr4 | 155385270 | 155385484        | + | 1        |
| CH250_68e18TJ.829   | 743 | 798 | 829 | chr4 | 160730292 | 160730347        | + | 1        |
| CH250_147k1TJ.825   | 348 | 401 | 825 | chr4 | 160773291 | 160773344        | + | 0.981481 |
| CH250_47n1TJ.657    | 312 | 364 | 657 | chr4 | 165936634 | 165936686        | + | 0.953488 |
| CH250_67b12TV.725   | 501 | 581 | 725 | chr4 | 165967540 | 165967620        | + | 0.961039 |
| CH250_163j13TJ.840  | 241 | 666 | 840 | chr4 | 165983702 | 165984127        | + | 0.969048 |
| CH250_92c19TV.869   | 472 | 609 | 869 | chr4 | 166001022 | <b>166001159</b> | + | 0.963768 |
| CH250_163j13TV.860  | 228 | 312 | 860 | chr4 | 166177156 | <b>166177072</b> | - | 0.929412 |
| CH250_92c19TJ.836   | 277 | 388 | 836 | chr4 | 166212489 | 166212378        | - | 0.991071 |
| CH255_25k4TV.491    | 41  | 491 | 491 | chr4 | 169285952 | 169286402        | + | 0.98916  |
| CH255_109o18TJ.878  | 340 | 878 | 878 | chr4 | 169333325 | 169333863        | + | 0.995565 |
| CH255_114i7TJ.898   | 250 | 299 | 898 | chr4 | 169440187 | 169440236        | + | 1        |
| CH255_10j19TJ.645   | 5   | 465 | 645 | chr4 | 169441899 | 169442359        | + | 0.983607 |
| CH255_48f14TJ.814   | 764 | 814 | 814 | chr4 | 169456101 | <b>169456151</b> | + | 1        |
| CH255_25k4TJ.346    | 220 | 346 | 346 | chr4 | 169516305 | <b>169516179</b> | - | 1        |
| CH255_109o18TV.888  | 531 | 853 | 888 | chr4 | 169518274 | 169517952        | - | 0.992727 |
| CH255_10j19TV.398   | 4   | 187 | 398 | chr4 | 169633268 | 169633085        | - | 0.993865 |
| CH255_2i2TJ.525     | 2   | 172 | 525 | chr4 | 176041556 | 176041726        | + | 0.99359  |
| CH255_24b3TJ.142    | 1   | 50  | 142 | chr4 | 176090527 | 176090576        | + | 1        |
| CH255_24c22TJ.237   | 6   | 237 | 237 | chr4 | 176100638 | 176100869        | + | 0.975    |
| CH255_240h19TJ.842  | 4   | 464 | 842 | chr4 | 176130053 | 176130513        | + | 0.993197 |
| CH255_266a13TJ.841  | 732 | 841 | 841 | chr4 | 176180119 | <b>176180228</b> | + | 1        |
| CH255_2i2TV.450     | 384 | 450 | 450 | chr4 | 176251446 | <b>176251380</b> | - | 1        |
| CH255_240h19TV.520  | 419 | 520 | 520 | chr4 | 176339067 | 176338966        | - | 0.984127 |
| CH255_24c22TV.529   | 3   | 529 | 529 | chr4 | 176355947 | 176355421        | - | 0.979943 |
| CH255_228j23TV.834  | 1   | 64  | 834 | chr4 | 176446260 | 176446197        | - | 1        |
| CH250_50j21TV.794   | 149 | 264 | 794 | chr4 | 179618647 | 179618762        | + | 0.982301 |
| CH250_59m2TJ.188    | 20  | 188 | 188 | chr4 | 179673256 | 179673424        | + | 0.928571 |

|                     |     |     |          |           |                    |          |
|---------------------|-----|-----|----------|-----------|--------------------|----------|
| CH250_61I7TJ.580    | 4   | 375 | 580 chr4 | 179673256 | 179673627 +        | 0.926154 |
| CH250_172e6TJ.824   | 221 | 300 | 824 chr4 | 179700210 | 179700289 +        | 0.9625   |
| CH250_53h10TV.786   | 255 | 600 | 786 chr4 | 179725696 | 179726041 +        | 0.964912 |
| CH250_53h10TJ.814   | 162 | 276 | 814 chr4 | 179906198 | 179906312 +        | 0.964912 |
| CH250_172e6TV.835   | 332 | 443 | 835 chr4 | 179949427 | 179949538 +        | 0.955357 |
| CH250_59m2TV.483    | 1   | 122 | 483 chr4 | 179964900 | 179965021 +        | 0.964706 |
| CH250_61I7TV.146    | 39  | 146 | 146 chr4 | 179965023 | 179965130 +        | 0.984127 |
| CH250_92b9TV.887    | 615 | 726 | 887 chr4 | 179968570 | 179968681 +        | 0.942308 |
| CH255_102d9TJ.692   | 383 | 692 | 692 chr4 | 182150030 | 182150339 +        | 0.964467 |
| CH255_206g6TV.627   | 6   | 619 | 627 chr4 | 182177152 | 182177765 +        | 0.968487 |
| CH255_115b10TJ.815  | 4   | 524 | 815 chr4 | 182190349 | 182190869 +        | 0.988095 |
| CH255_259o14TV.692  | 1   | 493 | 692 chr4 | 182278413 | <b>182278905</b> + | 0.984979 |
| CH255_194o14TJ.868  | 5   | 352 | 868 chr4 | 182330279 | <b>182329932</b> - | 0.987013 |
| CH255_206g6TJ.372   | 290 | 372 | 372 chr4 | 182347046 | 182346964 -        | 1        |
| CH255_132i3TJ.638   | 1   | 547 | 638 chr4 | 182563843 | 182563297 -        | 0.992141 |
| RP41_0072K10.g1.723 | 80  | 350 | 723 chr4 | 187167544 | <b>187167814</b> + | 0.958491 |
| RP41_0072K10.b1.750 | 33  | 134 | 750 chr4 | 187354523 | <b>187354422</b> - | 0.974026 |
| RP43_0078P13.g1.653 | 140 | 357 | 653 chr4 | 190891219 | <b>190891436</b> + | 0.869159 |
| RP43_0027N19.b1.743 | 286 | 365 | 743 chr4 | 190896588 | <b>190896509</b> - | 0.9375   |
| CH255_120o20TV.672  | 352 | 420 | 672 chr5 | 10123996  | <b>10124064</b> +  | 1        |
| CH255_120o20TJ.442  | 1   | 442 | 442 chr5 | 10314571  | <b>10314130</b> -  | 0.978378 |
| RP41_0086E09.b1.727 | 102 | 225 | 727 chr5 | 12194004  | 12194127 +         | 0.95935  |
| RP41_0055G19.g1.747 | 567 | 664 | 747 chr5 | 12284160  | <b>12284257</b> +  | 1        |
| RP41_0086E09.g1.735 | 283 | 384 | 735 chr5 | 12364015  | <b>12363914</b> -  | 0.961538 |
| CH255_204i10TJ.675  | 589 | 675 | 675 chr5 | 13003001  | 13002915 -         | 1        |
| RP43_0031C19.b1.718 | 79  | 332 | 718 chr5 | 18734478  | 18734731 +         | 0.995984 |
| RP43_0076E11.g1.615 | 3   | 252 | 615 chr5 | 18761767  | 18762016 +         | 0.982456 |
| RP43_128m9TV.774    | 1   | 50  | 774 chr5 | 18774615  | <b>18774664</b> +  | 1        |
| RP43_0076E11.b1.663 | 107 | 459 | 663 chr5 | 18900040  | <b>18899688</b> -  | 0.997101 |
| RP43_0031C19.g1.636 | 44  | 248 | 636 chr5 | 18923646  | 18923442 -         | 0.985507 |
| RP43_128m9TJ.802    | 20  | 300 | 802 chr5 | 18938396  | 18938116 -         | 0.980237 |
| RP43_0020O07.b1.706 | 55  | 230 | 706 chr5 | 18979990  | 18979815 -         | 0.988304 |
| RP41_0095N02.g1.723 | 430 | 532 | 723 chr5 | 25652138  | <b>25652240</b> +  | 0.969697 |
| RP41_0095N02.b1.758 | 44  | 243 | 758 chr5 | 25836698  | <b>25836499</b> -  | 0.956989 |
| CH255_12h7TJ.371    | 1   | 189 | 371 chr5 | 42412606  | 42412794 +         | 0.99375  |
| CH255_197a16TV.610  | 1   | 610 | 610 chr5 | 42537381  | 42537990 +         | 0.989717 |
| CH255_204k20TV.708  | 1   | 197 | 708 chr5 | 42578104  | 42578300 +         | 0.993865 |
| CH255_223a22TV.710  | 4   | 134 | 710 chr5 | 42613705  | <b>42613835</b> +  | 1        |
| CH255_223a22TJ.880  | 548 | 781 | 880 chr5 | 42812931  | <b>42812698</b> -  | 0.990338 |
| RP43_0013O03.g1.627 | 193 | 253 | 627 chr5 | 42924921  | <b>42924981</b> +  | 1        |
| RP43_0013O03.b1.731 | 41  | 615 | 731 chr5 | 43096259  | <b>43095685</b> -  | 0.997669 |
| CH255_140f9TJ.832   | 372 | 457 | 832 chr5 | 43432975  | <b>43433060</b> +  | 1        |
| CH255_140f9TV.808   | 612 | 756 | 808 chr5 | 43629568  | <b>43629424</b> -  | 0.980769 |
| CH255_199e9TV.745   | 694 | 745 | 745 chr5 | 44433373  | 44433424 +         | 1        |
| CH255_199e21TV.802  | 741 | 802 | 802 chr5 | 44433373  | 44433434 +         | 1        |
| CH255_198b8TV.778   | 1   | 480 | 778 chr5 | 44477177  | 44477656 +         | 0.983333 |
| CH255_226n23TV.904  | 5   | 904 | 904 chr5 | 44488522  | 44489421 +         | 0.980882 |
| CH255_37g5TV.775    | 711 | 775 | 775 chr5 | 44589862  | 44589926 +         | 1        |
| CH255_26c11TV.138   | 1   | 88  | 138 chr5 | 44598018  | <b>44598105</b> +  | 0.956522 |
| CH255_199e21TJ.716  | 554 | 716 | 716 chr5 | 44676720  | <b>44676558</b> -  | 1        |
| CH255_199e9TJ.617   | 510 | 617 | 617 chr5 | 44676720  | 44676613 -         | 1        |
| CH255_198b8TJ.865   | 299 | 403 | 865 chr5 | 44677037  | 44676933 -         | 1        |

|                     |     |     |          |           |                    |          |
|---------------------|-----|-----|----------|-----------|--------------------|----------|
| CH255_37g5TJ.608    | 1   | 608 | 608 chr5 | 44816742  | 44816135 -         | 0.9869   |
| CH255_26c11TJ.360   | 7   | 360 | 360 chr5 | 44915475  | 44915122 -         | 0.996753 |
| CH250_48j18TV.802   | 708 | 802 | 802 chr5 | 51396860  | <b>51396954</b> +  | 1        |
| CH250_48j18TJ.617   | 214 | 354 | 617 chr5 | 51537551  | <b>51537411</b> -  | 0.945736 |
| RP43_0164J10.b1.692 | 76  | 259 | 692 chr5 | 57018261  | <b>57018444</b> +  | 1        |
| CH255_18e9TJ.210    | 67  | 210 | 210 chr5 | 57205352  | 57205209 -         | 0.984848 |
| RP43_0164J10.g1.591 | 9   | 468 | 591 chr5 | 57207723  | <b>57207264</b> -  | 0.981752 |
| RP43_100g24TV.648   | 485 | 648 | 648 chr5 | 57270151  | 57269988 -         | 1        |
| CH250_36f16TJ.402   | 69  | 186 | 402 chr5 | 74323811  | 74323928 +         | 0.95     |
| CH250_9a24TJ.650    | 190 | 486 | 650 chr5 | 74343872  | 74344168 +         | 0.94     |
| RP43_120o12TV.373   | 227 | 373 | 373 chr5 | 74809073  | 74808927 -         | 0.983871 |
| RP43_0173K20.b1.703 | 411 | 595 | 703 chr5 | 76487386  | 76487202 -         | 0.976471 |
| CH255_38c19TV.323   | 1   | 323 | 323 chr5 | 82230752  | <b>82231074</b> +  | 0.98773  |
| CH255_38c19TJ.316   | 10  | 316 | 316 chr5 | 82441978  | <b>82441672</b> -  | 0.987261 |
| CH255_248c9TJ.838   | 13  | 838 | 838 chr5 | 93600893  | 93601718 +         | 0.993421 |
| CH255_143f15TJ.850  | 3   | 849 | 850 chr5 | 93640228  | <b>93641074</b> +  | 0.991117 |
| CH255_143f15TV.796  | 537 | 762 | 796 chr5 | 93864364  | <b>93864139</b> -  | 0.994792 |
| CH255_128b10TJ.854  | 333 | 830 | 854 chr5 | 94626422  | 94626919 +         | 0.988739 |
| CH255_214g4TV.722   | 3   | 722 | 722 chr5 | 94630223  | 94630942 +         | 0.990775 |
| CH255_19p24TV.531   | 54  | 531 | 531 chr5 | 94767988  | 94768465 +         | 0.98538  |
| CH255_97k3TV.139    | 41  | 139 | 139 chr5 | 94778527  | <b>94778625</b> +  | 0.985075 |
| CH255_121k17TJ.694  | 1   | 669 | 694 chr5 | 94805910  | <b>94805242</b> -  | 0.989983 |
| RP43_0047P05.g1.650 | 298 | 572 | 650 chr5 | 94823212  | 94823486 +         | 1        |
| CH255_128b10TV.504  | 395 | 504 | 504 chr5 | 94834876  | 94834767 -         | 0.983871 |
| RP43_0044A24.g1.619 | 170 | 356 | 619 chr5 | 94846920  | 94847106 +         | 0.994624 |
| CH255_130k10TJ.837  | 186 | 292 | 837 chr5 | 94873782  | 94873676 -         | 1        |
| RP43_0147L10.g1.612 | 180 | 318 | 612 chr5 | 94909320  | <b>94909458</b> +  | 0.992806 |
| CH255_228g16TJ.855  | 625 | 855 | 855 chr5 | 94940164  | 94939934 -         | 0.986301 |
| CH255_19p24TJ.419   | 169 | 419 | 419 chr5 | 94981158  | 94980908 -         | 1        |
| RP43_0044A24.b1.721 | 113 | 533 | 721 chr5 | 94981278  | <b>94980858</b> -  | 0.994382 |
| RP43_0047P05.b1.732 | 62  | 205 | 732 chr5 | 94988373  | 94988230 -         | 0.954887 |
| CH255_132c14TV.686  | 591 | 683 | 686 chr5 | 95034810  | 95034718 -         | 1        |
| RP43_0147L10.b1.677 | 80  | 574 | 677 chr5 | 95062053  | 95061559 -         | 0.995272 |
| CH250_175n18TJ.708  | 621 | 707 | 708 chr5 | 107085363 | <b>107085449</b> + | 0.96875  |
| CH250_175n18TV.850  | 575 | 850 | 850 chr5 | 107237929 | <b>107237654</b> - | 0.988281 |
| CH250_29j6TJ.850    | 3   | 427 | 850 chr5 | 107264614 | 107264190 -        | 0.949761 |
| RP43_104n5TJ.699    | 1   | 294 | 699 chr5 | 108086947 | 108086654 -        | 0.99095  |
| CH255_37j1TJ.601    | 544 | 601 | 601 chr5 | 127842807 | <b>127842864</b> + | 1        |
| CH255_37j1TV.625    | 243 | 625 | 625 chr5 | 128027808 | <b>128027426</b> - | 0.984733 |
| CH255_268p21TJ.814  | 1   | 311 | 814 chr5 | 130594166 | 130593856 -        | 0.996241 |
| CH250_147g13TV.798  | 4   | 245 | 798 chr5 | 133686851 | 133687092 +        | 0.95098  |
| CH250_74n21TV.886   | 321 | 384 | 886 chr5 | 133699066 | <b>133699129</b> + | 0.984375 |
| CH250_74n21TJ.814   | 358 | 814 | 814 chr5 | 133860911 | <b>133860455</b> - | 0.961111 |
| CH250_147g13TJ.752  | 43  | 133 | 752 chr5 | 133869030 | 133868940 -        | 0.970149 |
| RP41_29b12TJ.827    | 635 | 776 | 827 chr5 | 141439057 | <b>141439198</b> + | 0.961832 |
| RP41_29b12TV.857    | 494 | 627 | 857 chr5 | 141610014 | <b>141609881</b> - | 0.992537 |
| CH250_148n10TV.700  | 522 | 661 | 700 chr5 | 151719782 | 151719921 +        | 1        |
| CH255_258i10TJ.826  | 721 | 816 | 826 chr5 | 153466653 | 153466748 +        | 0.987952 |
| RP43_116e9TJ.591    | 411 | 591 | 591 chr5 | 156088389 | 156088569 +        | 1        |
| RP43_0013O06.g1.647 | 392 | 476 | 647 chr5 | 156120174 | 156120258 +        | 0.947368 |
| RP43_0072F17.g1.645 | 401 | 485 | 645 chr5 | 156120174 | <b>156120258</b> + | 0.965517 |
| RP43_0013O06.b1.715 | 358 | 577 | 715 chr5 | 156291351 | <b>156291132</b> - | 0.975    |

|                     |     |     |     |      |           |                  |   |          |
|---------------------|-----|-----|-----|------|-----------|------------------|---|----------|
| RP43_0072F17.b1.694 | 190 | 673 | 694 | chr5 | 156300627 | 156300144        | - | 0.995595 |
| RP41_24e19TV.896    | 33  | 128 | 896 | chr5 | 162580725 | 162580820        | + | 0.959459 |
| RP41_0056K19.b1.777 | 257 | 353 | 777 | chr5 | 162667730 | 162667826        | + | 0.979381 |
| RP41_0056K19.g1.729 | 464 | 597 | 729 | chr5 | 162819075 | 162818942        | - | 0.8      |
| RP41_0071F07.g1.712 | 120 | 264 | 712 | chr5 | 175648091 | <b>175648235</b> | + | 0.943262 |
| RP41_18d21TJ.799    | 1   | 175 | 799 | chr5 | 175822171 | <b>175821997</b> | - | 0.926667 |
| RP41_0071F07.b1.744 | 81  | 380 | 744 | chr5 | 175823812 | 175823513        | - | 0.952703 |
| CH255_2i7TJ.469     | 4   | 228 | 469 | chr6 | 11553348  | 11553572         | + | 0.975758 |
| CH255_124e9TV.804   | 724 | 804 | 804 | chr6 | 11639504  | 11639584         | + | 1        |
| CH255_218a16TV.672  | 603 | 672 | 672 | chr6 | 11641750  | 11641819         | + | 1        |
| CH255_194c15TJ.255  | 1   | 255 | 255 | chr6 | 11676792  | 11677046         | + | 0.990909 |
| CH255_206i24TV.395  | 313 | 388 | 395 | chr6 | 11687661  | 11687736         | + | 1        |
| CH255_265f11TJ.579  | 118 | 306 | 579 | chr6 | 11700150  | 11700338         | + | 0.983784 |
| CH255_198n17TJ.411  | 10  | 411 | 411 | chr6 | 11702455  | 11702856         | + | 0.978261 |
| CH255_1o2TV.396     | 241 | 290 | 396 | chr6 | 11719337  | 11719386         | + | 0.98     |
| CH255_218i19TJ.822  | 45  | 764 | 822 | chr6 | 11758714  | 11759433         | + | 0.992151 |
| CH255_236j3TJ.384   | 289 | 384 | 384 | chr6 | 11847301  | <b>11847396</b>  | + | 1        |
| CH255_124e9TJ.728   | 659 | 728 | 728 | chr6 | 11855148  | <b>11855079</b>  | - | 1        |
| CH255_218a16TJ.620  | 41  | 620 | 620 | chr6 | 11879446  | 11878867         | - | 0.989775 |
| CH255_140d2TV.353   | 3   | 345 | 353 | chr6 | 11883028  | 11883370         | + | 0.986842 |
| CH255_206i24TJ.478  | 36  | 478 | 478 | chr6 | 11937452  | 11937010         | - | 0.982935 |
| CH255_218i19TV.791  | 2   | 791 | 791 | chr6 | 11941212  | 11940423         | - | 0.984043 |
| CH255_1o2TJ.264     | 1   | 264 | 264 | chr6 | 11956741  | 11956478         | - | 0.985294 |
| CH255_140d2TJ.745   | 156 | 270 | 745 | chr6 | 12112243  | 12112129         | - | 0.991304 |
| RP43_0044H15.g1.646 | 128 | 276 | 646 | chr6 | 13692044  | <b>13692192</b>  | + | 0.986577 |
| RP43_0044H15.b1.726 | 85  | 199 | 726 | chr6 | 13873416  | <b>13873302</b>  | - | 1        |
| RP41_0072L10.g1.699 | 128 | 233 | 699 | chr6 | 26514759  | 26514864         | + | 0.933962 |
| RP41_0056P10.b1.767 | 226 | 540 | 767 | chr6 | 26522443  | 26522757         | + | 0.935018 |
| RP41_35k10TJ.862    | 215 | 529 | 862 | chr6 | 26522443  | <b>26522757</b>  | + | 0.938907 |
| RP41_7h17TV.774     | 383 | 572 | 774 | chr6 | 26703064  | <b>26702875</b>  | - | 0.952632 |
| RP41_0056P10.g1.700 | 86  | 236 | 700 | chr6 | 26710440  | 26710290         | - | 0.944828 |
| RP41_35k10TV.869    | 353 | 628 | 869 | chr6 | 26728284  | 26728009         | - | 0.941818 |
| CH255_120p20TJ.646  | 1   | 646 | 646 | chr6 | 27400436  | <b>27401081</b>  | + | 0.994141 |
| CH255_4f14TV.193    | 1   | 190 | 193 | chr6 | 27527731  | <b>27527542</b>  | - | 1        |
| CH255_244a19TJ.746  | 22  | 746 | 746 | chr6 | 27528495  | 27527771         | - | 1        |
| CH255_120p20TV.491  | 1   | 187 | 491 | chr6 | 27620516  | 27620330         | - | 0.984733 |
| CH255_244i12TJ.427  | 139 | 240 | 427 | chr6 | 27659214  | 27659113         | - | 0.980198 |
| RP43_0022F16.b1.696 | 72  | 259 | 696 | chr6 | 38304912  | <b>38305099</b>  | + | 0.994595 |
| RP43_0022F16.g1.607 | 47  | 449 | 607 | chr6 | 38491644  | <b>38491242</b>  | - | 1        |
| RP43_0036M08.b1.717 | 76  | 546 | 717 | chr6 | 38509003  | 38508533         | - | 0.997602 |
| RP41_0086A23.g1.702 | 292 | 369 | 702 | chr6 | 41367478  | <b>41367555</b>  | + | 0.968254 |
| RP41_0086A23.b1.737 | 60  | 199 | 737 | chr6 | 41549458  | <b>41549319</b>  | - | 0.968504 |
| RP43_0016N01.b1.713 | 487 | 593 | 713 | chr6 | 46865545  | 46865439         | - | 1        |
| CH255_7i16TV.207    | 112 | 207 | 207 | chr6 | 47109406  | 47109501         | + | 1        |
| CH255_240j4TV.680   | 140 | 304 | 680 | chr6 | 52623291  | 52623455         | + | 1        |
| CH255_250i20TV.632  | 82  | 632 | 632 | chr6 | 52786491  | <b>52787041</b>  | + | 0.982301 |
| CH255_240j4TJ.757   | 253 | 591 | 757 | chr6 | 52842810  | <b>52842472</b>  | - | 0.972561 |
| CH255_250i20TJ.706  | 17  | 270 | 706 | chr6 | 52968653  | 52968400         | - | 0.986667 |
| RP43_0008F11.g1.632 | 39  | 478 | 632 | chr6 | 80197221  | <b>80197660</b>  | + | 0.99422  |
| RP43_0008F11.b1.649 | 34  | 279 | 649 | chr6 | 80395840  | <b>80395595</b>  | - | 0.995327 |
| CH250_33h20TJ.463   | 257 | 341 | 463 | chr6 | 87149029  | <b>87149113</b>  | + | 0.985294 |
| CH250_33h20TV.702   | 139 | 446 | 702 | chr6 | 87336390  | <b>87336083</b>  | - | 0.927393 |

|                     |     |     |          |           |                    |          |
|---------------------|-----|-----|----------|-----------|--------------------|----------|
| CH255_200j10TV.749  | 531 | 749 | 749 chr6 | 97818152  | <b>97818370</b> +  | 1        |
| CH255_200j10TJ.767  | 4   | 79  | 767 chr6 | 98048059  | <b>98047984</b> -  | 1        |
| RP41_43o10TV.821    | 95  | 365 | 821 chr6 | 104530624 | 104530894 +        | 0.943396 |
| RP41_0065K02.b1.735 | 76  | 468 | 735 chr6 | 104564621 | <b>104565013</b> + | 0.960733 |
| RP41_43o10TJ.163    | 1   | 139 | 163 chr6 | 104701624 | <b>104701486</b> - | 0.966667 |
| RP41_0065K02.g1.721 | 194 | 272 | 721 chr6 | 104725155 | 104725077 -        | 0.962025 |
| RP41_14c14TJ.835    | 242 | 426 | 835 chr6 | 106868361 | <b>106868545</b> + | 0.961326 |
| RP41_14c14TV.532    | 33  | 492 | 532 chr6 | 107047185 | <b>107046726</b> - | 0.958716 |
| RP43_0150P07.b1.703 | 73  | 608 | 703 chr6 | 123957441 | <b>123957976</b> + | 0.993007 |
| RP43_0150P07.g1.617 | 4   | 493 | 617 chr6 | 124137282 | <b>124136793</b> - | 0.995146 |
| RP43_0019G06.g1.628 | 330 | 449 | 628 chr6 | 125231395 | <b>125231514</b> + | 1        |
| RP43_0019G06.b1.704 | 388 | 577 | 704 chr6 | 125284267 | <b>125284078</b> - | 1        |
| RP41_0075G02.b1.682 | 132 | 364 | 682 chr6 | 138878856 | <b>138879088</b> + | 0.973913 |
| RP41_0075G02.g1.693 | 281 | 523 | 693 chr6 | 139053032 | <b>139052790</b> - | 0.97006  |
| CH250_162i15TJ.775  | 11  | 155 | 775 chr6 | 141562839 | 141562695 -        | 0.894309 |
| CH250_77i14TV.510   | 39  | 510 | 510 chr6 | 144590457 | 144589986 -        | 0.957447 |
| CH250_39f11TJ.228   | 151 | 201 | 228 chr6 | 145432735 | 145432685 -        | 1        |
| CH250_147i7TV.376   | 9   | 67  | 376 chr6 | 151635871 | <b>151635929</b> + | 1        |
| CH250_147i7TJ.708   | 259 | 341 | 708 chr6 | 151847502 | <b>151847420</b> - | 0.982456 |
| CH250_152e1TJ.713   | 641 | 713 | 713 chr6 | 151861688 | 151861616 -        | 1        |
| CH250_43o17TV.580   | 435 | 571 | 580 chr6 | 152973878 | <b>152974014</b> + | 0.962687 |
| CH250_43o17TJ.837   | 535 | 710 | 837 chr6 | 153152973 | <b>153152798</b> - | 0.95     |
| CH250_174p9TV.670   | 374 | 552 | 670 chr6 | 153227388 | 153227210 -        | 1        |
| RP41_44d4TJ.863     | 1   | 103 | 863 chr6 | 153702165 | <b>153702267</b> + | 0.954023 |
| RP41_0076C08.b1.720 | 205 | 381 | 720 chr6 | 153889576 | <b>153889400</b> - | 0.932203 |
| RP41_0076E06.b1.634 | 191 | 324 | 634 chr6 | 153889576 | 153889443 -        | 0.918605 |
| RP41_0074B05.b1.750 | 209 | 336 | 750 chr6 | 153889576 | 153889449 -        | 0.9375   |
| RP43_111f4TV.127    | 34  | 117 | 127 chr6 | 161193964 | 161194047 +        | 1        |
| CH250_3I15TV.612    | 437 | 568 | 612 chr7 | 5476685   | <b>5476816</b> +   | 0.949153 |
| CH250_3I15TJ.391    | 4   | 59  | 391 chr7 | 5669960   | <b>5669905</b> -   | 0.90625  |
| CH255_214I3TV.236   | 78  | 151 | 236 chr7 | 5721750   | 5721677 -          | 1        |
| RP41_0155D05.g1.731 | 44  | 262 | 731 chr7 | 7457133   | 7456915 -          | 0.931579 |
| RP43_0078B18.g1.642 | 48  | 143 | 642 chr7 | 9236304   | 9236399 +          | 0.988372 |
| RP43_0042A22.b1.715 | 213 | 463 | 715 chr7 | 10845701  | 10845951 +         | 0.991304 |
| RP43_131n10TJ.848   | 360 | 848 | 848 chr7 | 10866333  | <b>10866821</b> +  | 0.980907 |
| RP43_0042A22.g1.637 | 4   | 472 | 637 chr7 | 10996820  | <b>10996352</b> -  | 0.982097 |
| RP43_131n10TV.862   | 1   | 50  | 862 chr7 | 11022073  | 11022024 -         | 1        |
| RP41_0087H20.g1.745 | 76  | 261 | 745 chr7 | 14424311  | <b>14424496</b> +  | 0.945055 |
| RP41_0087H20.b1.694 | 116 | 256 | 694 chr7 | 14587967  | <b>14587827</b> -  | 0.943262 |
| CH255_108d8TJ.643   | 1   | 82  | 643 chr7 | 14601980  | 14601899 -         | 1        |
| RP43_0030K12.b1.629 | 45  | 398 | 629 chr7 | 22529458  | 22529811 +         | 0.996564 |
| RP43_0088K21.b1.703 | 38  | 314 | 703 chr7 | 22573555  | 22573831 +         | 0.991304 |
| RP43_0023F10.g1.643 | 4   | 488 | 643 chr7 | 22594014  | 22594498 +         | 0.997326 |
| RP43_0157B04.b1.715 | 147 | 568 | 715 chr7 | 22594080  | 22594501 +         | 0.994186 |
| RP43_0148I15.b1.723 | 149 | 619 | 723 chr7 | 22594080  | <b>22594550</b> +  | 0.997085 |
| RP43_0038F15.g1.639 | 1   | 415 | 639 chr7 | 22663136  | <b>22662722</b> -  | 1        |
| RP43_0148I15.g1.627 | 435 | 528 | 627 chr7 | 22726500  | 22726407 -         | 1        |
| RP43_0023F10.b1.654 | 62  | 374 | 654 chr7 | 22774567  | 22774255 -         | 0.977612 |
| CH255_140k16TJ.860  | 754 | 827 | 860 chr7 | 36220767  | 36220840 +         | 1        |
| CH255_266e22TJ.743  | 3   | 56  | 743 chr7 | 36309706  | <b>36309759</b> +  | 1        |
| RP43_0020H17.g1.666 | 199 | 548 | 666 chr7 | 36309987  | 36310336 +         | 0.979695 |
| RP43_119p2TJ.764    | 667 | 764 | 764 chr7 | 36310772  | 36310869 +         | 1        |



|                     |     |     |          |          |                   |          |
|---------------------|-----|-----|----------|----------|-------------------|----------|
| RP43_127m1TV.322    | 1   | 321 | 322 chr7 | 36330513 | 36330833 +        | 0.985185 |
| RP43_0021K18.g1.641 | 196 | 334 | 641 chr7 | 36346059 | 36346197 +        | 1        |
| RP43_98d17TV.803    | 54  | 213 | 803 chr7 | 36353597 | 36353756 +        | 1        |
| CH255_266e22TV.770  | 284 | 770 | 770 chr7 | 36506565 | <b>36506079</b> - | 0.990826 |
| RP43_122d3TJ.889    | 692 | 889 | 889 chr7 | 39447828 | 39448025 +        | 1        |
| RP43_0145B02.g1.609 | 258 | 607 | 609 chr7 | 39583406 | <b>39583755</b> + | 0.994048 |
| RP43_122d3TV.526    | 180 | 526 | 526 chr7 | 39627957 | <b>39627611</b> - | 0.996528 |
| RP43_0039B14.g1.631 | 10  | 74  | 631 chr7 | 39640701 | <b>39640765</b> + | 1        |
| RP43_127b16TJ.756   | 1   | 128 | 756 chr7 | 39670765 | <b>39670638</b> - | 1        |
| RP43_0145B02.b1.682 | 121 | 307 | 682 chr7 | 39708197 | 39708011 -        | 0.97861  |
| RP43_0086O05.g1.625 | 2   | 304 | 625 chr7 | 39714246 | 39713944 -        | 1        |
| CH255_202k13TV.579  | 166 | 579 | 579 chr7 | 39874303 | <b>39874716</b> + | 1        |
| RP41_0088E12.g1.723 | 467 | 581 | 723 chr7 | 39945430 | <b>39945544</b> + | 1        |
| CH255_202k13TJ.566  | 419 | 563 | 566 chr7 | 40092429 | <b>40092285</b> - | 1        |
| RP41_0088E12.b1.746 | 335 | 447 | 746 chr7 | 40105977 | <b>40105865</b> - | 0.983607 |
| CH255_248m2TJ.838   | 5   | 125 | 838 chr7 | 42507290 | 42507410 +        | 1        |
| CH255_44a12TV.694   | 2   | 428 | 694 chr7 | 42610164 | <b>42610590</b> + | 0.98806  |
| CH255_44a12TJ.284   | 1   | 284 | 284 chr7 | 42794445 | <b>42794162</b> - | 1        |
| CH255_206g21TV.637  | 478 | 637 | 637 chr7 | 42804915 | 42804756 -        | 0.987179 |
| RP43_0062I09.b1.731 | 45  | 632 | 731 chr7 | 48787250 | 48787837 +        | 0.984513 |
| RP43_0170L05.b1.686 | 416 | 680 | 686 chr7 | 48795358 | 48795622 +        | 1        |
| RP43_0033P19.b1.723 | 476 | 544 | 723 chr7 | 48820058 | 48820126 +        | 1        |
| RP43_0171O10.g1.615 | 51  | 571 | 615 chr7 | 48850375 | 48850895 +        | 1        |
| RP43_0171M24.g1.621 | 486 | 561 | 621 chr7 | 48850812 | <b>48850887</b> + | 1        |
| RP43_0019H06.b1.733 | 417 | 576 | 733 chr7 | 48935895 | <b>48935736</b> - | 0.985075 |
| RP43_0166P23.g1.624 | 6   | 498 | 624 chr7 | 48940075 | 48939583 -        | 0.995122 |
| RP43_0062I09.g1.642 | 470 | 532 | 642 chr7 | 48946636 | 48946574 -        | 1        |
| RP43_0033P19.g1.634 | 48  | 495 | 634 chr7 | 48978856 | 48978409 -        | 0.993127 |
| RP43_0171M24.b1.702 | 140 | 519 | 702 chr7 | 49040521 | 49040142 -        | 0.97479  |
| CH255_128k13TJ.853  | 3   | 853 | 853 chr7 | 54234046 | 54234896 +        | 0.978008 |
| CH255_266e2TV.542   | 1   | 542 | 542 chr7 | 54372322 | <b>54372863</b> + | 0.973783 |
| CH255_128k13TV.529  | 91  | 526 | 529 chr7 | 54453499 | <b>54453064</b> - | 0.990148 |
| CH255_266e2TJ.386   | 16  | 200 | 386 chr7 | 54610439 | 54610255 -        | 0.975904 |
| RP43_0170B11.g1.628 | 97  | 539 | 628 chr7 | 55915790 | 55916232 +        | 0.971311 |
| RP43_0039B14.b1.732 | 59  | 422 | 732 chr7 | 55928624 | 55928987 +        | 0.991124 |
| RP43_0170B11.b1.730 | 492 | 647 | 730 chr7 | 56217713 | 56217558 -        | 1        |
| RP43_0152H23.g1.594 | 9   | 277 | 594 chr7 | 56220505 | 56220237 -        | 0.983936 |
| RP43_0066J07.g1.608 | 1   | 259 | 608 chr7 | 56275965 | 56275707 -        | 0.995935 |
| RP41_0062J01.b1.770 | 427 | 572 | 770 chr7 | 56503437 | 56503582 +        | 0.965909 |
| CH255_136m8TJ.419   | 303 | 411 | 419 chr7 | 57373644 | 57373536 -        | 1        |
| RP41_40p12TV.851    | 161 | 231 | 851 chr7 | 57464951 | 57465021 +        | 0.971831 |
| RP41_10j22TJ.650    | 368 | 444 | 650 chr7 | 62724763 | 62724687 -        | 0.987013 |
| CH255_258c2TJ.778   | 178 | 275 | 778 chr7 | 63582747 | 63582844 +        | 1        |
| CH255_258c2TV.746   | 5   | 721 | 746 chr7 | 63851115 | 63850399 -        | 0.989489 |
| RP43_0027C06.b1.705 | 114 | 345 | 705 chr7 | 64678508 | 64678277 -        | 0.974138 |
| RP41_42b3TJ.737     | 180 | 235 | 737 chr7 | 67331579 | 67331524 -        | 0.981132 |
| RP41_44d9TJ.580     | 336 | 488 | 580 chr7 | 68837930 | <b>68838082</b> + | 0.954248 |
| RP41_44d9TV.874     | 12  | 524 | 874 chr7 | 69011410 | <b>69010898</b> - | 0.982869 |
| RP41_13k1TV.832     | 277 | 661 | 832 chr7 | 69119045 | 69118661 -        | 0.981333 |
| RP41_0067P17.b1.757 | 74  | 162 | 757 chr7 | 96214136 | 96214224 +        | 0.963415 |
| RP43_133c17TV.872   | 39  | 159 | 872 chr7 | 97145323 | 97145443 +        | 1        |
| CH250_6i21TJ.377    | 115 | 332 | 377 chr7 | 98814065 | 98814282 +        | 0.9801   |

|                     |     |     |          |           |                    |          |
|---------------------|-----|-----|----------|-----------|--------------------|----------|
| CH250_83m4TJ.811    | 287 | 429 | 811 chr7 | 98905127  | 98905269 +         | 0.937063 |
| CH250_146h14TJ.860  | 397 | 648 | 860 chr7 | 98971050  | <b>98971301</b> +  | 0.964143 |
| CH250_83m4TV.850    | 22  | 145 | 850 chr7 | 98998975  | <b>98998852</b> -  | 0.946809 |
| CH250_71i15TJ.796   | 1   | 52  | 796 chr7 | 99002377  | <b>99002428</b> +  | 0.875    |
| CH250_146h14TV.875  | 451 | 504 | 875 chr7 | 99030005  | <b>99029952</b> -  | 0.944444 |
| CH250_71i15TV.845   | 714 | 845 | 845 chr7 | 99041034  | 99040903 -         | 0.949367 |
| RP41_0090A10.b1.774 | 442 | 598 | 774 chr7 | 129997149 | 129996993 -        | 1        |
| RP41_0064M14.g1.688 | 379 | 482 | 688 chr7 | 132537037 | <b>132537140</b> + | 1        |
| RP41_0064M14.b1.776 | 78  | 246 | 776 chr7 | 132724926 | <b>132724758</b> - | 0.969697 |
| CH255_102d11TJ.720  | 33  | 95  | 720 chr7 | 133650073 | 133650135 +        | 0.968254 |
| RP43_0006K06.g1.653 | 81  | 170 | 653 chr7 | 136964659 | 136964748 +        | 1        |
| CH250_156n24TJ.824  | 203 | 281 | 824 chr7 | 136964670 | 136964748 +        | 0.961538 |
| CH250_75e3TV.885    | 685 | 848 | 885 chr7 | 136996075 | 136996238 +        | 0.967742 |
| RP43_0090K24.b1.696 | 93  | 185 | 696 chr7 | 137057887 | <b>137057979</b> + | 0.988235 |
| RP43_0006K06.b1.679 | 319 | 518 | 679 chr7 | 137158939 | <b>137158740</b> - | 0.987952 |
| RP43_0090K24.g1.631 | 50  | 419 | 631 chr7 | 137225586 | 137225217 -        | 0.979104 |
| RP41_0059J12.g1.740 | 451 | 592 | 740 chr7 | 147472455 | <b>147472596</b> + | 0.975    |
| RP41_0059J12.b1.770 | 384 | 609 | 770 chr7 | 147632236 | <b>147632011</b> - | 0.948454 |
| RP41_18e23TJ.849    | 470 | 687 | 849 chr7 | 148921764 | 148921547 -        | 0.990741 |
| RP41_0066G14.g1.729 | 75  | 500 | 729 chr7 | 148928150 | 148927725 -        | 0.966759 |
| CH250_148g1TV.845   | 1   | 336 | 845 chr7 | 148938537 | 148938202 -        | 0.965035 |
| CH250_175o11TJ.759  | 428 | 632 | 759 chr7 | 151140128 | 151140332 +        | 0.950495 |
| CH255_127i6TV.765   | 114 | 186 | 765 chr7 | 153146254 | 153146182 -        | 0.955224 |
| CH255_240d24TJ.630  | 503 | 630 | 630 chr8 | 2010244   | <b>2010371</b> +   | 1        |
| CH255_240d24TV.390  | 305 | 375 | 390 chr8 | 2192498   | <b>2192428</b> -   | 1        |
| RP43_116p21TJ.816   | 702 | 816 | 816 chr8 | 7149738   | 7149852 +          | 1        |
| CH255_122k5TJ.450   | 1   | 165 | 450 chr8 | 8695689   | <b>8695853</b> +   | 0.98374  |
| CH255_122k5TV.343   | 8   | 227 | 343 chr8 | 8893034   | <b>8892815</b> -   | 0.968421 |
| RP43_0078F03.g1.634 | 91  | 244 | 634 chr8 | 12264885  | 12264732 -         | 0.968    |
| RP43_0145P18.g1.623 | 397 | 510 | 623 chr8 | 26768290  | <b>26768403</b> +  | 1        |
| RP43_0145P18.b1.701 | 41  | 538 | 701 chr8 | 26912157  | <b>26911660</b> -  | 0.990544 |
| CH255_224i22TV.649  | 1   | 636 | 649 chr8 | 38405642  | <b>38406277</b> +  | 0.995789 |
| CH255_224i22TJ.582  | 450 | 582 | 582 chr8 | 38638965  | <b>38638833</b> -  | 1        |
| RP41_0074G24.g1.709 | 129 | 341 | 709 chr8 | 40794667  | 40794879 +         | 0.942857 |
| RP41_0076D18.g1.784 | 336 | 441 | 784 chr8 | 41011291  | 41011186 -         | 0.94     |
| RP41_0077D18.g1.758 | 336 | 441 | 758 chr8 | 41011291  | 41011186 -         | 0.941176 |
| CH255_128o14TJ.818  | 1   | 421 | 818 chr8 | 41542650  | 41542230 -         | 0.989446 |
| RP41_47n17TJ.842    | 749 | 807 | 842 chr8 | 42541627  | 42541685 +         | 1        |
| RP41_1n14TJ.766     | 1   | 375 | 766 chr8 | 42608767  | 42609141 +         | 0.974138 |
| RP41_0096G13.b1.751 | 227 | 306 | 751 chr8 | 42613728  | <b>42613807</b> +  | 0.9875   |
| RP41_47n17TV.861    | 1   | 107 | 861 chr8 | 42710122  | <b>42710016</b> -  | 0.988095 |
| RP41_1n14TV.600     | 23  | 124 | 600 chr8 | 42763499  | 42763398 -         | 0.9625   |
| RP41_34c11TJ.866    | 578 | 715 | 866 chr8 | 42935906  | 42936043 +         | 0.971014 |
| CH250_163e4TV.889   | 585 | 732 | 889 chr8 | 42935906  | 42936053 +         | 0.966216 |
| CH250_91j11TJ.711   | 1   | 69  | 711 chr8 | 49023491  | <b>49023559</b> +  | 1        |
| CH250_91j11TV.877   | 249 | 305 | 877 chr8 | 49164540  | <b>49164484</b> -  | 0.982456 |
| RP41_0081F21.g1.764 | 70  | 132 | 764 chr8 | 52111951  | 52111889 -         | 0.980392 |
| RP41_5d12TJ.569     | 19  | 179 | 569 chr8 | 52171240  | 52171080 -         | 0.934783 |
| RP43_0034L19.b1.724 | 57  | 341 | 724 chr8 | 54469559  | 54469843 +         | 0.98513  |
| RP43_121k9TV.593    | 148 | 593 | 593 chr8 | 54472114  | 54472559 +         | 0.979661 |
| RP43_101e21TJ.793   | 302 | 604 | 793 chr8 | 54527199  | 54527501 +         | 0.996516 |
| RP43_0016O08.g1.649 | 253 | 435 | 649 chr8 | 54607196  | 54607378 +         | 0.985915 |

|                     |     |     |          |           |                    |          |
|---------------------|-----|-----|----------|-----------|--------------------|----------|
| RP43_0040G02.b1.740 | 56  | 511 | 740 chr8 | 54636114  | <b>54636569</b> +  | 0.991781 |
| RP43_101e21TV.604   | 3   | 604 | 604 chr8 | 54679252  | <b>54678651</b> -  | 0.993724 |
| RP43_0040G02.g1.638 | 83  | 502 | 638 chr8 | 54777403  | 54776984 -         | 0.990712 |
| RP43_0016O08.b1.696 | 81  | 557 | 696 chr8 | 54778046  | 54777570 -         | 0.994667 |
| CH255_118b4TJ.748   | 685 | 748 | 748 chr8 | 55983269  | <b>55983332</b> +  | 1        |
| CH255_118b4TV.771   | 676 | 771 | 771 chr8 | 56163263  | <b>56163168</b> -  | 1        |
| CH255_46g17TJ.722   | 637 | 722 | 722 chr8 | 56430979  | 56431064 +         | 1        |
| CH255_234I5TV.691   | 474 | 666 | 691 chr8 | 56518282  | 56518474 +         | 0.992126 |
| CH250_170c19TJ.793  | 292 | 554 | 793 chr8 | 56519371  | 56519633 +         | 0.931559 |
| CH250_21i17TJ.857   | 290 | 552 | 857 chr8 | 56519371  | 56519633 +         | 0.945274 |
| CH250_174b17TJ.679  | 606 | 669 | 679 chr8 | 56829563  | 56829500 -         | 1        |
| CH255_214m7TJ.653   | 338 | 653 | 653 chr8 | 59283950  | 59284265 +         | 0.990291 |
| CH255_206b14TJ.656  | 314 | 656 | 656 chr8 | 59283950  | 59284292 +         | 0.990566 |
| CH255_206b3TJ.645   | 79  | 244 | 645 chr8 | 59376996  | 59377161 +         | 0.993548 |
| CH255_30a20TV.265   | 1   | 265 | 265 chr8 | 59378378  | 59378642 +         | 0.975962 |
| CH255_256n9TV.828   | 4   | 86  | 828 chr8 | 59413340  | 59413422 +         | 1        |
| CH255_240k11TJ.729  | 481 | 581 | 729 chr8 | 59450017  | <b>59450117</b> +  | 1        |
| CH255_214m7TV.842   | 486 | 842 | 842 chr8 | 59476197  | <b>59475841</b> -  | 1        |
| CH255_206b14TV.575  | 432 | 575 | 575 chr8 | 59476197  | 59476054 -         | 1        |
| CH255_270a1TV.181   | 1   | 181 | 181 chr8 | 59504882  | 59504702 -         | 0.964789 |
| CH255_30a20TJ.308   | 227 | 308 | 308 chr8 | 59565396  | 59565315 -         | 1        |
| CH255_256n9TJ.829   | 1   | 298 | 829 chr8 | 59620406  | 59620109 -         | 0.992857 |
| CH250_TV.829        | 385 | 436 | 829 chr8 | 71101361  | 71101310 -         | 0.972222 |
| CH255_48i18TV.742   | 2   | 108 | 742 chr8 | 82876080  | <b>82876186</b> +  | 0.988636 |
| CH255_205m6TJ.828   | 643 | 828 | 828 chr8 | 83076938  | <b>83076753</b> -  | 0.983607 |
| CH255_48i18TJ.795   | 249 | 521 | 795 chr8 | 83082593  | 83082321 -         | 0.992674 |
| CH250_19n14TJ.873   | 798 | 871 | 873 chr8 | 95072915  | 95072842 -         | 0.970588 |
| RP41_8c10TJ.705     | 101 | 245 | 705 chr8 | 100169674 | <b>100169818</b> + | 0.976562 |
| RP41_0077O02.g1.753 | 77  | 471 | 753 chr8 | 100386392 | <b>100385998</b> - | 0.93617  |
| RP41_0060C18.g1.746 | 407 | 604 | 746 chr8 | 100402159 | 100401962 -        | 0.930233 |
| CH250_1n2TV.682     | 1   | 169 | 682 chr8 | 114748140 | 114748308 +        | 0.953642 |
| CH250_18I14TV.665   | 2   | 239 | 665 chr8 | 114881280 | <b>114881517</b> + | 0.955556 |
| CH250_1n2TJ.878     | 754 | 806 | 878 chr8 | 114933038 | <b>114932986</b> - | 1        |
| CH250_18I14TJ.752   | 167 | 509 | 752 chr8 | 115093000 | 115092658 -        | 0.967552 |
| RP41_0064C10.g1.716 | 261 | 401 | 716 chr8 | 125023263 | 125023123 -        | 0.964539 |
| RP43_0012M17.g1.642 | 409 | 465 | 642 chr8 | 130976702 | <b>130976758</b> + | 1        |
| RP43_0012M17.b1.727 | 467 | 608 | 727 chr8 | 131132594 | <b>131132453</b> - | 1        |
| RP41_0071B10.b1.756 | 64  | 205 | 756 chr8 | 132432535 | 132432394 -        | 0.952    |
| CH255_126j4TV.198   | 1   | 198 | 198 chr8 | 133745124 | 133744927 -        | 0.977273 |
| RP41_42g16TJ.769    | 192 | 275 | 769 chr8 | 146282822 | 146282905 +        | 0.916667 |
| CH255_113f17TJ.753  | 589 | 753 | 753 chr9 | 14915133  | 14915297 +         | 0.991525 |
| CH255_205a5TV.356   | 87  | 261 | 356 chr9 | 15032530  | 15032704 +         | 0.990909 |
| CH255_205a5TJ.704   | 13  | 187 | 704 chr9 | 15257795  | 15257621 -         | 0.988304 |
| RP41_0070F13.g1.698 | 94  | 531 | 698 chr9 | 15263927  | 15264364 +         | 0.94081  |
| CH255_18g11TV.265   | 3   | 87  | 265 chr9 | 15285450  | 15285366 -         | 1        |
| CH255_130k3TJ.818   | 5   | 692 | 818 chr9 | 17136875  | 17137562 +         | 0.989097 |
| CH255_193n24TV.380  | 175 | 276 | 380 chr9 | 17146579  | 17146680 +         | 1        |
| CH255_138b11TJ.739  | 26  | 739 | 739 chr9 | 17207472  | 17208185 +         | 0.986799 |
| CH255_138i7TJ.827   | 1   | 797 | 827 chr9 | 17207473  | <b>17208269</b> +  | 0.989348 |
| CH255_104k10TV.793  | 3   | 344 | 793 chr9 | 17305702  | <b>17305361</b> -  | 0.987302 |
| CH255_130k3TV.462   | 1   | 194 | 462 chr9 | 17367157  | 17366964 -         | 0.98773  |
| RP41_34n21TJ.867    | 761 | 855 | 867 chr9 | 25895934  | <b>25896028</b> +  | 1        |

|                     |     |     |               |           |                    |          |
|---------------------|-----|-----|---------------|-----------|--------------------|----------|
| RP41_34n21TV.867    | 467 | 551 | 867 chr9      | 26091240  | <b>26091156</b> -  | 0.964286 |
| RP41_18n20TV.901    | 532 | 633 | 901 chr9      | 33566935  | 33567036 +         | 0.969388 |
| CH255_108f7TJ.212   | 44  | 100 | 212 chr9      | 43862971  | 43863027 +         | 1        |
| RP43_107f14TJ.729   | 1   | 80  | 729 chr9      | 44260180  | 44260259 +         | 1        |
| RP43_0048G11.b1.778 | 80  | 350 | 778 chr9      | 44328056  | 44328326 +         | 0.992481 |
| CH255_125o10TJ.628  | 20  | 155 | 628 chr9      | 62592268  | 62592403 +         | 0.962963 |
| CH250_27m2TV.817    | 27  | 83  | 817 chr9      | 62753562  | 62753618 +         | 1        |
| RP43_0048G11.g1.647 | 1   | 536 | 647 chr9      | 63363104  | 63362569 -         | 0.987654 |
| RP43_0016N01.g1.620 | 183 | 382 | 620 chr9      | 65606309  | 65606110 -         | 1        |
| RP43_119e10TV.222   | 122 | 196 | 222 chr9      | 65614125  | 65614051 -         | 1        |
| CH255_144f13TV.320  | 102 | 320 | 320 chr9      | 70731667  | 70731885 +         | 0.993007 |
| CH255_218k17TJ.727  | 11  | 594 | 727 chr9      | 70732356  | 70732939 +         | 0.983425 |
| CH255_133f22TJ.854  | 710 | 795 | 854 chr9      | 70764595  | <b>70764680</b> +  | 0.981132 |
| CH255_144f13TJ.644  | 541 | 643 | 644 chr9      | 70900867  | <b>70900765</b> -  | 1        |
| CH255_133f22TV.623  | 6   | 99  | 623 chr9      | 70948668  | 70948575 -         | 1        |
| CH255_218k17TV.664  | 460 | 592 | 664 chr9      | 70949562  | 70949430 -         | 0.987654 |
| RP41_23n12TV.823    | 132 | 289 | 823 chr9      | 81155388  | 81155545 +         | 0.954545 |
| RP41_0087O13.b1.742 | 77  | 143 | 742 chr9      | 81192966  | <b>81193032</b> +  | 1        |
| RP41_23n12TJ.735    | 304 | 452 | 735 chr9      | 81335024  | <b>81334876</b> -  | 1        |
| RP41_0087O13.g1.722 | 289 | 351 | 722 chr9      | 81381204  | 81381142 -         | 1        |
| RP41_10h8TV.855     | 389 | 494 | 855 chr9      | 81438322  | 81438217 -         | 0.942308 |
| RP41_18d7TJ.837     | 433 | 696 | 837 chr9      | 88209117  | <b>88209380</b> +  | 0.942966 |
| CH250_150f13TJ.843  | 1   | 84  | 843 chr9      | 88246399  | <b>88246482</b> +  | 0.961538 |
| RP41_18d7TV.767     | 587 | 767 | 767 chr9      | 88419834  | <b>88419654</b> -  | 0.966292 |
| CH250_170p12TJ.842  | 681 | 782 | 842 chr9      | 88525961  | <b>88525860</b> -  | 0.988506 |
| RP41_32f7TV.883     | 576 | 627 | 883 chr9      | 95016489  | 95016540 +         | 0.980769 |
| CH255_217b23TJ.765  | 181 | 237 | 765 chr9      | 95398615  | 95398559 -         | 1        |
| RP41_2f19TJ.839     | 89  | 177 | 839 chr9      | 114851347 | <b>114851435</b> + | 0.962963 |
| RP41_2f19TV.867     | 351 | 461 | 867 chr9      | 115002456 | <b>115002346</b> - | 0.972973 |
| RP41_0069C08.b1.742 | 128 | 266 | 742 chr9      | 117171916 | <b>117172054</b> + | 0.977099 |
| RP41_0074O18.g1.672 | 223 | 371 | 672 chr9      | 117340909 | <b>117340761</b> - | 0.929688 |
| RP41_0069C08.g1.726 | 80  | 222 | 726 chr9      | 117341053 | 117340911 -        | 0.940741 |
| CH250_37p15TJ.569   | 226 | 289 | 569 chr9      | 123316937 | 123317000 +        | 1        |
| RP41_0159F09.b1.751 | 329 | 441 | 751 chr9      | 125570296 | <b>125570408</b> + | 0.944444 |
| RP41_0159F09.g1.737 | 62  | 334 | 737 chr9      | 125756345 | <b>125756073</b> - | 0.950758 |
| RP41_0081J20.g1.748 | 268 | 336 | 748 chr9      | 132145437 | 132145369 -        | 1        |
| RP41_0081O20.g1.750 | 153 | 214 | 750 chr9      | 135031911 | 135031972 +        | 0.983871 |
| RP43_132g17TJ.604   | 5   | 292 | 604 chrUn_ran | 1136673   | 1136386 -          | 0.974074 |
| RP43_126n22TV.909   | 19  | 136 | 909 chrUn_ran | 1146443   | 1146326 -          | 0.965909 |
| RP43_0048F07.b1.754 | 110 | 607 | 754 chrUn_ran | 1148823   | 1148326 -          | 0.983146 |
| RP43_129h4TJ.607    | 74  | 607 | 607 chrUn_ran | 1187347   | 1186814 -          | 0.978858 |
| RP43_0002M16.b1.703 | 125 | 508 | 703 chrUn_ran | 1214090   | 1213707 -          | 0.979839 |
| RP43_0038H05.g1.613 | 304 | 436 | 613 chrUn_ran | 1798815   | 1798947 +          | 1        |
| RP41_0095J08.b1.762 | 64  | 450 | 762 chrX      | 5803536   | 5803150 -          | 0.972125 |
| RP43_124n9TV.478    | 410 | 463 | 478 chrX      | 6625809   | 6625756 -          | 1        |
| RP43_0010O12.g1.642 | 452 | 515 | 642 chrX      | 8227172   | 8227109 -          | 1        |
| RP43_0088K21.g1.637 | 466 | 536 | 637 chrX      | 20166467  | 20166397 -         | 1        |
| RP41_0063O23.g1.729 | 193 | 293 | 729 chrX      | 23248134  | 23248234 +         | 0.950495 |
| RP43_105e11TJ.796   | 1   | 796 | 796 chrX      | 33338580  | <b>33339375</b> +  | 0.993506 |
| RP43_0021M15.b1.738 | 73  | 160 | 738 chrX      | 33340953  | <b>33340866</b> -  | 0.987179 |
| RP43_0076G03.b1.668 | 74  | 455 | 668 chrX      | 33405803  | 33405422 -         | 0.99697  |
| RP43_105e11TV.552   | 44  | 213 | 552 chrX      | 33506435  | 33506266 -         | 0.993631 |

|                     |     |     |               |           |                    |          |
|---------------------|-----|-----|---------------|-----------|--------------------|----------|
| CH250_163a22TV.879  | 310 | 423 | 879 chrX      | 37250069  | 37249956 -         | 0.990476 |
| RP43_110e1TJ.838    | 6   | 759 | 838 chrX      | 41772990  | 41772237 -         | 0.998454 |
| RP41_22i2TJ.834     | 1   | 190 | 834 chrX      | 48356152  | <b>48356341</b> +  | 0.986667 |
| RP41_22i2TV.847     | 304 | 445 | 847 chrX      | 48511760  | <b>48511619</b> -  | 0.964789 |
| CH255_254p15TV.656  | 1   | 85  | 656 chrX      | 71430161  | 71430245 +         | 1        |
| CH255_256k18TV.788  | 4   | 87  | 788 chrX      | 71430162  | 71430245 +         | 1        |
| RP41_0092E04.b1.772 | 240 | 560 | 772 chrX      | 82369872  | 82369552 -         | 0.919048 |
| CH255_32k21TJ.150   | 1   | 150 | 150 chrX      | 82763748  | 82763897 +         | 0.973684 |
| CH255_208o3TV.545   | 4   | 366 | 545 chrX      | 82798015  | 82798377 +         | 0.980315 |
| CH255_42a8TJ.599    | 5   | 375 | 599 chrX      | 83025968  | 83025598 -         | 0.97541  |
| RP41_0073F18.b1.719 | 64  | 525 | 719 chrX      | 92814526  | 92814987 +         | 0.944828 |
| RP41_0073I22.b1.719 | 62  | 484 | 719 chrX      | 105760150 | <b>105760572</b> + | 0.96134  |
| RP41_7j6TJ.825      | 11  | 455 | 825 chrX      | 105883682 | <b>105883238</b> - | 0.955504 |
| RP41_0073I22.g1.686 | 96  | 308 | 686 chrX      | 105946666 | 105946454 -        | 0.975248 |
| CH255_26e16TV.124   | 4   | 124 | 124 chrX      | 106982796 | 106982916 +        | 1        |
| CH255_26e16TJ.488   | 3   | 157 | 488 chrX      | 107250095 | 107249941 -        | 0.986207 |
| CH255_139d15TJ.828  | 47  | 828 | 828 chrX      | 107385093 | 107384312 -        | 0.993017 |
| RP41_0056P04.g1.710 | 490 | 571 | 710 chrX      | 110577932 | 110578013 +        | 1        |
| CH255_204I8TV.610   | 4   | 195 | 610 chrX      | 111987903 | <b>111988094</b> + | 0.983957 |
| CH255_204I8TJ.765   | 5   | 765 | 765 chrX      | 112176707 | <b>112175947</b> - | 0.994334 |
| RP43_0150G15.b1.700 | 420 | 526 | 700 chrX      | 118690417 | 118690523 +        | 1        |
| RP43_0002M11.b1.713 | 65  | 382 | 713 chrX      | 118870259 | <b>118870576</b> + | 0.996815 |
| RP43_0150G15.g1.640 | 1   | 296 | 640 chrX      | 118920615 | <b>118920320</b> - | 0.989796 |
| CH255_11m22TJ.298   | 2   | 290 | 298 chrX      | 136937005 | 136937293 +        | 0.985981 |
| RP43_0031J22.b1.745 | 61  | 643 | 745 chrX      | 136998721 | 136998139 -        | 0.995181 |
| CH255_208k5TJ.633   | 1   | 355 | 633 chrX      | 137331677 | 137331323 -        | 0.993127 |
| CH255_250k3TJ.798   | 17  | 417 | 798 chrX      | 141065424 | 141065024 -        | 0.973333 |
| CH255_202p22TJ.830  | 2   | 830 | 830 chrX      | 142404244 | 142403416 -        | 0.980583 |
| CH255_218m23TJ.568  | 217 | 315 | 568 chrX_rand | 499536    | 499438 -           | 1        |
| CH255_144d20TJ.488  | 430 | 488 | 488 chrX_rand | 3000967   | 3001025 +          | 1        |
| RP43_119d23TJ.222   | 1   | 222 | 222 chrY      | 2473239   | 2473460 +          | 1        |
| RP43_0164F08.b1.714 | 420 | 588 | 714 chrY      | 2500817   | 2500985 +          | 0.970588 |
| RP43_0164F08.g1.619 | 7   | 493 | 619 chrY      | 6407537   | 6407051 -          | 0.990025 |
| CH255_44a15TV.924   | 1   | 371 | 924 chrY      | 6521375   | 6521745 +          | 0.985423 |
| RP41_0056J10.b1.748 | 54  | 203 | 748 chrY      | 13336250  | 13336399 +         | 0.952055 |
| CH255_254i8TJ.363   | 61  | 125 | 363 chrY      | 13383348  | 13383284 -         | 0.982143 |
| RP43_98i4TV.703     | 253 | 323 | 703 chrY      | 13492069  | 13492139 +         | 1        |
| CH255_205h24TJ.681  | 318 | 419 | 681 chrY      | 13544028  | <b>13544129</b> +  | 0.939394 |
| RP43_0040H16.g1.631 | 88  | 456 | 631 chrY      | 13585498  | 13585866 +         | 0.986111 |
| RP43_98i4TJ.863     | 469 | 681 | 863 chrY      | 13625083  | 13624871 -         | 0.990291 |
| CH255_254i8TV.626   | 154 | 248 | 626 chrY      | 13718331  | <b>13718237</b> -  | 0.968085 |
| RP43_0040H16.b1.699 | 217 | 317 | 699 chrY      | 13760530  | 13760430 -         | 0.990099 |
| RP41_0056J10.g1.721 | 47  | 380 | 721 chrY      | 13881283  | 13880950 -         | 0.964744 |
| RP41_18b7TV.876     | 490 | 698 | 876 chrY      | 14587156  | 14587364 +         | 0.949495 |
| RP43_0164C02.g1.617 | 399 | 511 | 617 chrY      | 15490078  | 15489966 -         | 1        |
| RP43_124n9TJ.460    | 7   | 295 | 460 chrY      | 16409394  | <b>16409682</b> +  | 0.995633 |
| RP43_0040J05.b1.705 | 57  | 301 | 705 chrY      | 16601036  | <b>16600792</b> -  | 0.973684 |
| RP43_0164C02.b1.703 | 68  | 548 | 703 chrY      | 16989389  | 16988909 -         | 0.982278 |
| CH255_217i4TJ.752   | 536 | 752 | 752 chrY      | 17329701  | 17329917 +         | 0.978261 |
| CH255_236n10TV.564  | 1   | 151 | 564 chrY      | 17345958  | <b>17346108</b> +  | 0.991736 |
| CH255_125o18TV.116  | 6   | 116 | 116 chrY      | 17427557  | <b>17427447</b> -  | 1        |
| CH255_200k22TJ.589  | 5   | 137 | 589 chrY      | 17444320  | 17444188 -         | 0.972222 |



|                     |     |     |     |      |          |                 |   |          |
|---------------------|-----|-----|-----|------|----------|-----------------|---|----------|
| RP41_0155H16.b1.758 | 99  | 192 | 758 | chrY | 18528498 | 18528591        | + | 0.914894 |
| CH255_262b2TV.689   | 632 | 689 | 689 | chrY | 18688535 | 18688592        | + | 1        |
| RP41_0049M08.g1.728 | 154 | 246 | 728 | chrY | 18970544 | 18970452        | - | 0.903226 |
| RP41_0155G22.b1.757 | 464 | 535 | 757 | chrY | 19045950 | <b>19046021</b> | + | 0.952381 |
| RP41_0155H16.g1.760 | 431 | 628 | 760 | chrY | 19148443 | <b>19148246</b> | - | 0.923077 |
| RP43_134o11TJ.865   | 574 | 865 | 865 | chrY | 19992584 | <b>19992875</b> | + | 0.984694 |
| RP43_134o11TV.640   | 393 | 460 | 640 | chrY | 20154502 | <b>20154435</b> | - | 0.970588 |
| RP41_0054D06.g1.762 | 83  | 218 | 762 | chrY | 20539044 | 20539179        | + | 0.942149 |
| RP43_129j10TV.834   | 259 | 319 | 834 | chrY | 49924679 | 49924739        | + | 0.983607 |
| CH255_204j16TJ.283  | 216 | 283 | 283 | chrY | 49924679 | 49924746        | + | 1        |

1467 BACs which hybridized with PTERV1 *gag* and *env* probes were end-sequenced and mapped against the human genome assembly by quality sequence alignment. Insertion sites were refined based on the placement of 2 or more BACs from a species to the same location and highlighted by black border. Different species are highlighted by different colors (Red GGO, Green PTR, Light blue MMU, Blue PAN).
