# Supplementary material
Source: PubMed Central journal article supplement (PMC1074792)
Supplement: pbio.0030110.st003.pdf [file pbio.0030110.st003.pdf]

Table S3

Retroviral map intervals that potentially overlap between species\*.

Summary of potential orthologous PTERV1 insertion sites by species

| Human Coordinates (Build34 assembly) |       |           |                    | Summary of potential orthologous PTERV1 insertion sites by species |       |         |        |         |
|--------------------------------------|-------|-----------|--------------------|--------------------------------------------------------------------|-------|---------|--------|---------|
| BACID                                | Chrom | begin     | end                | % Identity                                                         | Chimp | Gorilla | Baboon | Macaque |
| *RP41_31a20TJ.836                    | chr1  | 119530260 | <b>119530321</b> + | 95.2%                                                              | X     | X       | X      | X       |
| *CH250_168c7TJ.825                   | chr1  | 119664263 | <b>119664347</b> + | 96.5%                                                              |       | 1 X     | X      | X       |
| *RP41_31a20TV.880                    | chr1  | 119690678 | <b>119690520</b> - | 98.1%                                                              |       |         | 2 X    | X       |
| RP41_0065D07.g1.705                  | chr1  | 119703847 | 119703734 -        | 94.7%                                                              |       | 3       | 0      | 5 X     |
| *CH250_168c7TV.892                   | chr1  | 119808674 | <b>119808161</b> - | 97.3%                                                              |       |         |        |         |
| *RP41_0082H03.g1.753                 | chr10 | 63369779  | <b>63369930</b> +  | 96.1%                                                              |       |         |        |         |
| *CH250_82f19TV.838                   | chr10 | 63402978  | <b>63403544</b> +  | 94.5%                                                              |       |         |        |         |
| *CH250_61n13TV.711                   | chr10 | 63514427  | <b>63514236</b> -  | 95.3%                                                              |       |         |        |         |
| *RP41_0082H03.b1.725                 | chr10 | 63523433  | <b>63523327</b> -  | 94.4%                                                              |       |         |        |         |
| *RP43_0002J22.g1.634                 | chr12 | 31775357  | <b>31775588</b> +  | 98.7%                                                              |       |         |        |         |
| *CH250_21m16TJ.537                   | chr12 | 31793783  | <b>31793876</b> +  | 94.7%                                                              |       |         |        |         |
| *RP43_0088A08.b1.682                 | chr12 | 31889282  | <b>31889015</b> -  | 96.6%                                                              |       |         |        |         |
| *CH250_92e23TV.880                   | chr12 | 31987590  | <b>31987363</b> -  | 94.3%                                                              |       |         |        |         |
| *CH250_172c10TJ.846                  | chr13 | 95686016  | <b>95686249</b> +  | 97.0%                                                              |       |         |        |         |
| *RP41_0050D04.g1.751                 | chr13 | 95732167  | 95732440 +         | 94.5%                                                              |       |         |        |         |
| *RP41_0068D04.b1.774                 | chr13 | 95754130  | <b>95754255</b> +  | 93.7%                                                              |       |         |        |         |
| *CH250_23a7TJ.466                    | chr13 | 95821229  | <b>95821075</b> -  | 96.1%                                                              |       |         |        |         |
| CH250_172c10TV.888                   | chr13 | 95843921  | 95843847 -         | 97.3%                                                              |       |         |        |         |
| *RP41_0050D04.b1.776                 | chr13 | 95888828  | <b>95888775</b> -  | 94.4%                                                              |       |         |        |         |
| *RP43_0161K06.g1.620                 | chr14 | 18946695  | <b>18947124</b> +  | 97.0%                                                              |       |         |        |         |
| *RP41_10g5TJ.750                     | chr14 | 19098959  | <b>19099313</b> +  | 94.1%                                                              |       |         |        |         |
| *RP41_0072B21.g1.699                 | chr14 | 19110956  | <b>19110864</b> -  | 94.6%                                                              |       |         |        |         |
| *RP43_0161K06.b1.717                 | chr14 | 19116461  | <b>19115950</b> -  | 98.4%                                                              |       |         |        |         |
| *CH255_12i11TV.399                   | chr18 | 49704814  | <b>49705208</b> +  | 97.7%                                                              |       |         |        |         |
| *RP41_0061O18.b1.788                 | chr18 | 49789665  | <b>49789840</b> +  | 96.0%                                                              |       |         |        |         |
| *CH255_12i11TJ.302                   | chr18 | 49884393  | <b>49884123</b> -  | 98.2%                                                              |       |         |        |         |
| *RP41_18k21TJ.852                    | chr18 | 49965079  | <b>49965026</b> -  | 96.3%                                                              |       |         |        |         |

|                      |      |           |                  |   |        |
|----------------------|------|-----------|------------------|---|--------|
| *CH250_148j3TV.691   | chr2 | 4209530   | <b>4209765</b>   | + | 91.9%  |
| *RP41_0161O24.g1.688 | chr2 | 4247027   | <b>4247105</b>   | + | 94.9%  |
| *CH250_148j3TJ.728   | chr2 | 4367524   | <b>4367292</b>   | - | 94.4%  |
| *RP41_0053H13.g1.693 | chr2 | 4378320   | <b>4377828</b>   | - | 94.3%  |
| *CH250_12d8TJ.810    | chr2 | 142195969 | <b>142196106</b> | + | 97.8%  |
| *RP43_0151J13.b1.721 | chr2 | 142199448 | <b>142199733</b> | + | 97.9%  |
| *CH250_86e17TJ.850   | chr2 | 142337324 | <b>142337220</b> | - | 100.0% |
| CH250_63j16TJ.736    | chr2 | 142348857 | 142348765        | - | 96.8%  |
| CH250_9j16TV.534     | chr2 | 142348857 | 142348765        | - | 96.8%  |
| *RP43_0070B15.g1.633 | chr2 | 142355976 | <b>142355468</b> | - | 97.6%  |
| *CH250_92j13TJ.838   | chr2 | 143662193 | <b>143662258</b> | + | 98.5%  |
| *RP43_114h16TJ.777   | chr2 | 143684971 | <b>143685693</b> | + | 99.3%  |
| *CH250_172e2TV.874   | chr2 | 143762549 | <b>143762472</b> | - | 100.0% |
| CH250_92j13TV.809    | chr2 | 143811041 | 143810959        | - | 95.2%  |
| *RP43_114h16TV.760   | chr2 | 143880427 | <b>143880367</b> | - | 96.7%  |
| *CH255_202k13TV.579  | chr7 | 39874303  | <b>39874716</b>  | + | 100.0% |
| *RP41_0088E12.g1.723 | chr7 | 39945430  | <b>39945544</b>  | + | 91.3%  |
| *CH255_202k13TJ.566  | chr7 | 40092429  | <b>40092285</b>  | - | 99.3%  |
| *RP41_0088E12.b1.746 | chr7 | 40105977  | <b>40105865</b>  | - | 98.2%  |
| *RP41_18d7TJ.837     | chr9 | 88209117  | <b>88209380</b>  | + | 94.3%  |
| *CH250_150f13TJ.843  | chr9 | 88246399  | <b>88246482</b>  | + | 96.4%  |
| *RP41_18d7TV.767     | chr9 | 88419834  | <b>88419654</b>  | - | 95.6%  |
| *CH250_170p12TJ.842  | chr9 | 88525961  | <b>88525860</b>  | - | 98.0%  |
| *CH255_205h24TJ.681  | chrY | 13544028  | <b>13544129</b>  | + | 94.1%  |
| *RP43_0040H16.g1.631 | chrY | 13585498  | <b>13585866</b>  | + | 98.6%  |
| *RP43_98i4TJ.863     | chrY | 13625083  | <b>13624871</b>  | - | 99.1%  |
| *CH255_254i8TV.626   | chrY | 13718331  | <b>13718237</b>  | - | 96.8%  |

\*Each BAC was T7 and SP6 end-sequenced. Sequences were mapped to the human genome assembly (orientation is indicated +/-)
