# Supplementary material
Source: PubMed Central journal article supplement (PMC1074792)
Supplement: pbio.0030110.st004.pdf [file pbio.0030110.st004.pdf]

**Table S4 A. Genetic distance (Kimura) for gag-env portions**

|     | PTR             | GGO             | MMU             | PAN             |
|-----|-----------------|-----------------|-----------------|-----------------|
| PTR | 0.028 +/- 0.003 |                 |                 |                 |
| GGO | 0.038 +/- 0.003 | 0.041 +/- 0.003 |                 |                 |
| MMU | 0.092 +/- 0.006 | 0.096 +/- 0.006 | 0.103 +/- 0.007 |                 |
| PAN | 0.097 +/- 0.007 | 0.101 +/- 0.007 | 0.106 +/- 0.007 | 0.090 +/- 0.006 |

\*Portions of the gag and env genes (X=823 bp) were resequenced for n PTERV1 elements from common chimpanzee (PTR), gorilla (GGO), rhesus macaque (MMU) and the olive baboon (PAN). The number of substitutions between and within groups is compared (Kimura 2-parameter model).

\*\*Overall substitution among all elements was 0.073 +/- 0.004

**Table S4 B. Genetic distance (Kimura) for LTR portions.**

|     | PTR             | GGO             | MMU             | PAN             |
|-----|-----------------|-----------------|-----------------|-----------------|
| PTR | 0.031 +/- 0.006 |                 |                 |                 |
| GGO | 0.039 +/- 0.006 | 0.037 +/- 0.006 |                 |                 |
| MMU | 0.140 +/- 0.015 | 0.143 +/- 0.015 | 0.142 +/- 0.016 |                 |
| PAN | 0.250 +/- 0.023 | 0.245 +/- 0.023 | 0.181 +/- 0.018 | 0.242 +/- 0.020 |

\*The number of substitutions (K2M) for LTR (295 bp) sequence was compared between and within species.

\*\*Overall substitution among all elements was 0.157 +/- 0.013
