# Supplementary material
Source: PubMed Central journal article supplement (PMC1074792)
Supplement: pbio.0030110.st005.pdf [file pbio.0030110.st005.pdf]

**Table S5 : Distribution of LTR mismatches for each species (observed) compared with a Poisson distribution (expected).**

|            | Chimp |          |          |                | Gorilla  |       |          |          | Baboon         |          |       |          | Macaque  |                |          |       |          |          |                |
|------------|-------|----------|----------|----------------|----------|-------|----------|----------|----------------|----------|-------|----------|----------|----------------|----------|-------|----------|----------|----------------|
| mismatch   | P(X)  | observed | expected | X <sup>2</sup> | mismatch | P(X)  | observed | expected | X <sup>2</sup> | mismatch | P(X)  | observed | expected | X <sup>2</sup> | mismatch | P(X)  | observed | expected | X <sup>2</sup> |
| 0          | 0.033 | 3        | 0.894    | 4.957          | 0        | 0.055 | 4        | 1.651    | 3.344          | 0        | 0.208 | 6        | 4.363    | 0.614          | 0        | 0.209 | 6        | 4.808    | 0.296          |
| 1          | 0.113 | 3        | 3.048    | 0.001          | 1        | 0.160 | 6        | 4.787    | 0.307          | 1        | 0.326 | 5        | 6.856    | 0.502          | 1        | 0.327 | 7        | 7.526    | 0.037          |
| 2          | 0.192 | 3        | 5.192    | 0.926          | 2        | 0.231 | 5        | 6.941    | 0.543          | 2        | 0.257 | 5        | 5.387    | 0.028          | 2        | 0.256 | 5        | 5.890    | 0.134          |
| 3          | 0.218 | 6        | 5.897    | 0.002          | 3        | 0.224 | 5        | 6.710    | 0.436          | >=3      | 0.204 | 5        | 4.278    | 0.122          | >=3      | 0.190 | 5        | 4.373    | 0.090          |
| 4          | 0.186 | 3        | 5.024    | 0.815          | 4        | 0.162 | 4        | 4.865    | 0.154          |          |       |          |          |                |          |       |          |          |                |
| 5          | 0.127 | 5        | 3.424    | 0.726          | >=5      | 0.165 | 6        | 4.955    | 0.220          |          |       |          |          |                |          |       |          |          |                |
| >=6        | 0.122 | 4        | 3.294    | 0.151          |          |       |          |          |                |          |       |          |          |                |          |       |          |          |                |
| Mean       | 3.41  |          |          |                | 2.90     |       |          |          |                | 1.57     |       |          |          |                | 1.57     |       |          |          |                |
| SD         | 2.21  |          |          | df=5           | 2.31     |       |          |          | df=4           | 1.43     |       |          |          | df=2           | 1.50     |       |          |          | df=2           |
| Sum        |       | 27       | 27       | 7.577          |          |       | 30       | 30       | 5              |          |       | 21       | 21       | 1              |          |       | 23       | 23       | 0.556          |
| P(CHITEST) |       |          |          | >0.1           |          |       |          |          | >0.2           |          |       |          |          | >0.9           |          |       |          |          | >0.7           |

A Poisson distribution was computed based on the mean number of mismatch for each species. A X<sup>2</sup> test was performed between observed and expected value.
