# Supplementary material
Source: PubMed Central journal article supplement (PMC1074792)
Supplement: pbio.0030110.st006.pdf [file pbio.0030110.st006.pdf]

**Table S6 Mapping of solo LTR and full length PTERV1 elements in human genome (Build34)**

| Chromosor | Begin     | End       | Map Interval | Class    |
|-----------|-----------|-----------|--------------|----------|
| chr1      | 54731794  | 54732703  | 909          | Solo LTR |
| chr1      | 111119344 | 111121314 | 1970         | Solo LTR |
| chr1      | 147822764 | 147824602 | 1838         | Solo LTR |
| chr1      | 235744256 | 235746249 | 1993         | Solo LTR |
| chr2      | 79983496  | 79985117  | 1621         | Solo LTR |
| chr2      | 142276933 | 142278773 | 1840         | Solo LTR |
| chr2      | 147493981 | 147495817 | 1836         | Solo LTR |
| chr3      | 50530464  | 50532305  | 1841         | Solo LTR |
| chr3      | 58385331  | 58387309  | 1978         | Solo LTR |
| chr3      | 59005921  | 59007769  | 1848         | Solo LTR |
| chr3      | 71863426  | 71865395  | 1969         | Solo LTR |
| chr3      | 76001258  | 76003104  | 1846         | Solo LTR |
| chr3      | 131090914 | 131091886 | 972          | Solo LTR |
| chr3      | 131092402 | 131092875 | 473          | Solo LTR |
| chr4      | 32142797  | 32144545  | 1748         | Solo LTR |
| chr4      | 33936015  | 33937967  | 1952         | Solo LTR |
| chr4      | 68950775  | 68951775  | 1000         | Solo LTR |
| chr4      | 80752308  | 80754173  | 1865         | Solo LTR |
| chr4      | 93012169  | 93014016  | 1847         | Solo LTR |
| chr4      | 114310965 | 114312946 | 1981         | Solo LTR |
| chr4      | 161088248 | 161089257 | 1009         | Solo LTR |
| chr4      | 161115289 | 161117147 | 1858         | Solo LTR |
| chr5      | 23280766  | 23281768  | 1002         | Solo LTR |
| chr5      | 76372398  | 76374236  | 1838         | Solo LTR |
| chr5      | 94941557  | 94942551  | 994          | Solo LTR |
| chr5      | 108038073 | 108039920 | 1847         | Solo LTR |
| chr6      | 77268274  | 77270259  | 1985         | Solo LTR |
| chr7      | 22641392  | 22642204  | 812          | Solo LTR |
| chr7      | 39493688  | 39495534  | 1846         | Solo LTR |
| chr7      | 54299299  | 54338420  | 39121        | Solo LTR |
| chr7      | 55575949  | 55576910  | 961          | Solo LTR |
| chr7      | 56168597  | 56169228  | 631          | Solo LTR |
| chr7      | 77818044  | 77819881  | 1837         | Solo LTR |
| chr7      | 83072736  | 83074591  | 1855         | Solo LTR |
| chr8      | 8083952   | 8084093   | 141          | Solo LTR |
| chr8      | 8084339   | 8085913   | 1574         | Solo LTR |
| chr8      | 11922537  | 11924372  | 1835         | Solo LTR |
| chr8      | 33536566  | 33538419  | 1853         | Solo LTR |
| chr8      | 103140826 | 103142668 | 1842         | Solo LTR |
| chr8      | 140003428 | 140005287 | 1859         | Solo LTR |
| chr9      | 2755619   | 2757582   | 1963         | Solo LTR |
| chr10     | 34241444  | 34243276  | 1832         | Solo LTR |
| chr10     | 65261618  | 65263587  | 1969         | Solo LTR |
| chr10     | 82124726  | 82126493  | 1767         | Solo LTR |
| chr10     | 131895667 | 131896517 | 850          | Solo LTR |
| chr11     | 5605466   | 5607326   | 1860         | Solo LTR |
| chr11     | 39982191  | 39983029  | 838          | Solo LTR |
| chr11     | 40015647  | 40016641  | 994          | Solo LTR |
| chr11     | 60034604  | 60036400  | 1796         | Solo LTR |

|       |           |           |                         |
|-------|-----------|-----------|-------------------------|
| chr11 | 73069490  | 73070427  | 937 Solo LTR            |
| chr11 | 88982422  | 88983276  | 854 Solo LTR            |
| chr12 | 4697481   | 4699442   | 1961 Solo LTR           |
| chr12 | 14302828  | 14304794  | 1966 Solo LTR           |
| chr12 | 24260383  | 24261357  | 974 Solo LTR            |
| chr12 | 37773613  | 37775464  | 1851 Solo LTR           |
| chr12 | 58001769  | 58002753  | 984 Solo LTR            |
| chr12 | 84423969  | 84424816  | 847 Solo LTR            |
| chr12 | 99964540  | 99966373  | 1833 Solo LTR           |
| chr12 | 126858199 | 126860056 | 1857 Solo LTR           |
| chr13 | 44049710  | 44051713  | 2003 Solo LTR           |
| chr14 | 26303548  | 26304397  | 849 Solo LTR            |
| chr14 | 42255367  | 42257213  | 1846 Solo LTR           |
| chr14 | 43826174  | 43828022  | 1848 Solo LTR           |
| chr14 | 85474775  | 85476653  | 1878 Solo LTR           |
| chr15 | 51831796  | 51833760  | 1964 Solo LTR           |
| chr15 | 59815366  | 59817306  | 1940 Solo LTR           |
| chr16 | 8194026   | 8195871   | 1845 Solo LTR           |
| chr17 | 19525105  | 19526807  | 1702 Solo LTR           |
| chr17 | 27118580  | 27120431  | 1851 Solo LTR           |
| chr17 | 35844360  | 35846211  | 1851 Solo LTR           |
| chr18 | 12486411  | 12487289  | 878 Solo LTR            |
| chr18 | 27641857  | 27642789  | 932 Solo LTR            |
| chr18 | 47143822  | 47145666  | 1844 Solo LTR           |
| chr18 | 66269942  | 66271910  | 1968 Solo LTR           |
| chr19 | 23698157  | 23699995  | 1838 Solo LTR           |
| chr19 | 58130470  | 58132305  | 1835 Solo LTR           |
| chr20 | 46690227  | 46692019  | 1792 Solo LTR           |
| chr20 | 58818500  | 58820345  | 1845 Solo LTR           |
| chr22 | 47660230  | 47662073  | 1843 Solo LTR           |
| chrX  | 6876493   | 6878342   | 1849 Solo LTR           |
| chrX  | 39894638  | 39895717  | 1079 Solo LTR           |
| chrX  | 80366936  | 80367931  | 995 Solo LTR            |
| chrX  | 88211317  | 88213089  | 1772 Solo LTR           |
| chrX  | 92842195  | 92844158  | 1963 Solo LTR           |
| chrX  | 136109951 | 136110961 | 1010 Solo LTR           |
| chrY  | 2349016   | 2349851   | 835 Solo LTR            |
| chrY  | 14203508  | 14205409  | 1901 Solo LTR           |
| chrY  | 16554654  | 16554754  | 100 Solo LTR            |
| chrY  | 17907216  | 17909046  | 1830 Solo LTR           |
| chrY  | 20120263  | 20121104  | 841 Solo LTR            |
| chr1  | 54730942  | 54731794  | 852 Full length PtERV1  |
| chr1  | 66309175  | 66310827  | 1652 Full length PtERV1 |
| chr1  | 111203341 | 111205052 | 1711 Full length PtERV1 |
| chr1  | 113881516 | 113882476 | 960 Full length PtERV1  |
| chr1  | 180520473 | 180522296 | 1823 Full length PtERV1 |
| chr2  | 31489958  | 31491925  | 1967 Full length PtERV1 |
| chr2  | 33873483  | 33875289  | 1806 Full length PtERV1 |
| chr2  | 65482582  | 65483578  | 996 Full length PtERV1  |
| chr2  | 70623549  | 70625353  | 1804 Full length PtERV1 |
| chr2  | 83478811  | 83480794  | 1983 Full length PtERV1 |
| chr2  | 84173674  | 84175510  | 1836 Full length PtERV1 |

|       |           |           |                         |
|-------|-----------|-----------|-------------------------|
| chr2  | 143808621 | 143810603 | 1982 Full length PtERV1 |
| chr2  | 155924592 | 155925566 | 974 Full length PtERV1  |
| chr2  | 209266156 | 209267519 | 1363 Full length PtERV1 |
| chr2  | 211432626 | 211433614 | 988 Full length PtERV1  |
| chr2  | 215899808 | 215901433 | 1625 Full length PtERV1 |
| chr3  | 39323801  | 39325663  | 1862 Full length PtERV1 |
| chr3  | 44767517  | 44768526  | 1009 Full length PtERV1 |
| chr3  | 78341533  | 78343503  | 1970 Full length PtERV1 |
| chr3  | 87697533  | 87699378  | 1845 Full length PtERV1 |
| chr3  | 88169218  | 88170218  | 1000 Full length PtERV1 |
| chr3  | 95502275  | 95504169  | 1894 Full length PtERV1 |
| chr3  | 131091886 | 131092402 | 516 Full length PtERV1  |
| chr3  | 163792615 | 163794459 | 1844 Full length PtERV1 |
| chr4  | 47267059  | 47269060  | 2001 Full length PtERV1 |
| chr4  | 47677557  | 47679397  | 1840 Full length PtERV1 |
| chr4  | 72970115  | 72971117  | 1002 Full length PtERV1 |
| chr4  | 74268840  | 74270854  | 2014 Full length PtERV1 |
| chr4  | 108796279 | 108797266 | 987 Full length PtERV1  |
| chr4  | 117350389 | 117353847 | 3458 Full length PtERV1 |
| chr4  | 161093604 | 161095602 | 1998 Full length PtERV1 |
| chr5  | 18846348  | 18848229  | 1881 Full length PtERV1 |
| chr5  | 42950470  | 42952440  | 1970 Full length PtERV1 |
| chr5  | 57143465  | 57145445  | 1980 Full length PtERV1 |
| chr5  | 59024597  | 59026441  | 1844 Full length PtERV1 |
| chr5  | 74663683  | 74665646  | 1963 Full length PtERV1 |
| chr5  | 76307225  | 76308210  | 985 Full length PtERV1  |
| chr5  | 94940710  | 94941557  | 847 Full length PtERV1  |
| chr5  | 156207051 | 156208072 | 1021 Full length PtERV1 |
| chr6  | 38443224  | 38444105  | 881 Full length PtERV1  |
| chr6  | 147748534 | 147750506 | 1972 Full length PtERV1 |
| chr6  | 154182232 | 154187051 | 4819 Full length PtERV1 |
| chr6  | 167556086 | 167557067 | 981 Full length PtERV1  |
| chr6  | 167567228 | 167568075 | 847 Full length PtERV1  |
| chr7  | 10980236  | 10982204  | 1968 Full length PtERV1 |
| chr7  | 36413748  | 36415591  | 1843 Full length PtERV1 |
| chr7  | 39586669  | 39588495  | 1826 Full length PtERV1 |
| chr7  | 48878172  | 48880142  | 1970 Full length PtERV1 |
| chr7  | 55576910  | 55577841  | 931 Full length PtERV1  |
| chr7  | 55717796  | 55719670  | 1874 Full length PtERV1 |
| chr7  | 61072410  | 61073374  | 964 Full length PtERV1  |
| chr7  | 137131794 | 137132793 | 999 Full length PtERV1  |
| chr8  | 54656576  | 54657528  | 952 Full length PtERV1  |
| chr8  | 98043553  | 98044393  | 840 Full length PtERV1  |
| chr10 | 43132513  | 43134470  | 1957 Full length PtERV1 |
| chr10 | 61323212  | 61325181  | 1969 Full length PtERV1 |
| chr10 | 85544318  | 85545325  | 1007 Full length PtERV1 |
| chr10 | 104627660 | 104628659 | 999 Full length PtERV1  |
| chr10 | 104629183 | 104629470 | 287 Full length PtERV1  |
| chr10 | 131909535 | 131910378 | 843 Full length PtERV1  |
| chr11 | 40046726  | 40047729  | 1003 Full length PtERV1 |
| chr11 | 71079518  | 71080523  | 1005 Full length PtERV1 |
| chr11 | 77004432  | 77005278  | 846 Full length PtERV1  |

|       |           |           |                         |
|-------|-----------|-----------|-------------------------|
| chr11 | 94074278  | 94076242  | 1964 Full length PtERV1 |
| chr12 | 5517662   | 5519505   | 1843 Full length PtERV1 |
| chr12 | 8541730   | 8543699   | 1969 Full length PtERV1 |
| chr12 | 14760304  | 14761275  | 971 Full length PtERV1  |
| chr12 | 31852232  | 31854191  | 1959 Full length PtERV1 |
| chr12 | 32069663  | 32071500  | 1837 Full length PtERV1 |
| chr12 | 36736203  | 36738157  | 1954 Full length PtERV1 |
| chr12 | 37316703  | 37318684  | 1981 Full length PtERV1 |
| chr12 | 40434608  | 40435608  | 1000 Full length PtERV1 |
| chr12 | 58000796  | 58001769  | 973 Full length PtERV1  |
| chr12 | 70892142  | 70900305  | 8163 Full length PtERV1 |
| chr12 | 72504616  | 72505535  | 919 Full length PtERV1  |
| chr12 | 75171893  | 75172866  | 973 Full length PtERV1  |
| chr12 | 84422975  | 84423969  | 994 Full length PtERV1  |
| chr13 | 22203180  | 22205145  | 1965 Full length PtERV1 |
| chr14 | 19093151  | 19094110  | 959 Full length PtERV1  |
| chr14 | 57058514  | 57060450  | 1936 Full length PtERV1 |
| chr16 | 10391638  | 10393602  | 1964 Full length PtERV1 |
| chr16 | 10566579  | 10567579  | 1000 Full length PtERV1 |
| chr16 | 31596805  | 31597779  | 974 Full length PtERV1  |
| chr16 | 60004977  | 60005950  | 973 Full length PtERV1  |
| chr18 | 30487910  | 30488905  | 995 Full length PtERV1  |
| chr18 | 31683744  | 31685710  | 1966 Full length PtERV1 |
| chr19 | 32975282  | 32977211  | 1929 Full length PtERV1 |
| chr19 | 42709688  | 42711515  | 1827 Full length PtERV1 |
| chr19 | 48358042  | 48359033  | 991 Full length PtERV1  |
| chr20 | 20200851  | 20202695  | 1844 Full length PtERV1 |
| chr20 | 33438422  | 33438945  | 523 Full length PtERV1  |
| chr21 | 14172059  | 14172381  | 322 Full length PtERV1  |
| chr22 | 15459767  | 15459870  | 103 Full length PtERV1  |
| chr22 | 15470551  | 15471526  | 975 Full length PtERV1  |
| chrX  | 41695832  | 41696588  | 756 Full length PtERV1  |
| chrX  | 64432874  | 64433846  | 972 Full length PtERV1  |
| chrX  | 136956475 | 136957449 | 974 Full length PtERV1  |
| chrY  | 6357189   | 6357273   | 84 Full length PtERV1   |
| chrY  | 6628195   | 6630071   | 1876 Full length PtERV1 |
| chrY  | 13584728  | 13585720  | 992 Full length PtERV1  |
| chrY  | 13656784  | 13657782  | 998 Full length PtERV1  |
| chrY  | 14169506  | 14170285  | 779 Full length PtERV1  |
| chrY  | 16502113  | 16504048  | 1935 Full length PtERV1 |
| chrY  | 16553656  | 16554654  | 998 Full length PtERV1  |
| chrY  | 16830021  | 16830881  | 860 Full length PtERV1  |
| chrY  | 20121104  | 20122098  | 994 Full length PtERV1  |
| chrY  | 20361982  | 20362957  | 975 Full length PtERV1  |

Using LTR and PtERV(LTR sequence excluded) Megablast against Chimpanzee assembly (2003). Any loci hit by LTR and PtERV (both of them are within 10Kb to each other) are considered as Full-length, alternatively only LTR hit loci are defined as Solo LTR. The chimpanzee coordinate were transferred to correspondent human assembly (build34) coordinates by the program liftover ( see the Methods for details).
