# Supplementary material
Source: PubMed Central journal article supplement (PMC1074792)
Supplement: pbio.0030110.st007.pdf [file pbio.0030110.st007.pdf]

Table S7 PTERV1 distribution in chimpanzee genome

|           | Full-Length* | Solo LTR** |
|-----------|--------------|------------|
| Genic     | 14           | 8          |
| Non-genic | 93           | 82         |
| Total     | 107          | 90         |

\*Full-length elements are those which extend beyond the LTR into gag and/or env portion. Because of the repetitive nature of these elements, Arachne failed to provide continuous sequence these elements.

\*\*Solo LTR are those which consist solely of LTR sequence.
