# Supplementary material
Source: PubMed Central journal article supplement (PMC1074792)
Supplement: pbio.0030110.st008.pdf [file pbio.0030110.st008.pdf]

Table S8 The keys (numbers) and their corresponding clones for Figure 4.

| Key | Clone                   |
|-----|-------------------------|
| 1   | Gorilla 10g22           |
| 2   | Gorilla 115h12          |
| 3   | Gorilla 126l9           |
| 4   | Gorilla 138m5           |
| 5   | Gorilla 24l1            |
| 6   | Gorilla 19p24           |
| 7   | Gorilla 144o12          |
| 8   | Gorilla 214f22          |
| 9   | Gorilla 211n3           |
| 10  | Gorilla 44a12           |
| 11  | Gorilla 254i8           |
| 12  | Gorilla 138p14          |
| 13  | Gorilla 138p14b         |
| 14  | Gorilla 204c16          |
| 15  | Gorilla 204c16          |
| 16  | Gorilla 218g10          |
| 17  | Gorilla 130k3           |
| 18  | Gorilla 199e9           |
| 19  | Gorilla 230l15          |
| 20  | Gorilla 266e22          |
| 21  | Gorilla 12k13           |
| 22  | Chimpanzee 16i6         |
| 23  | Gorilla 270g5           |
| 24  | Gorilla 254p6           |
| 25  | Gorilla 30a20           |
| 26  | Chimpanzee 94i7         |
| 27  | Chimpanzee 14e15        |
| 28  | Chimpanzee 86j13        |
| 29  | Chimpanzee 41h9         |
| 30  | Chimpanzee 40h16        |
| 31  | Chimpanzee 25e22        |
| 32  | no sample               |
| 33  | Chimpanzee 17o20        |
| 34  | Chimpanzee 70g8         |
| 35  | Chimpanzee 68b15        |
| 36  | Chimpanzee 90k24        |
| 37  | Chimpanzee 31j22        |
| 38  | Chimpanzee 16o7         |
| 39  | Chimpanzee 13o3         |
| 40  | Chimpanzee 13o6         |
| 41  | Chimpanzee 15b12        |
| 42  | Chimpanzee 62i9,33p19   |
| 43  | Chimpanzee 16o8         |
| 44  | Chimpanzee 34j17, 28b10 |
| 45  | Chimpanzee 68m12, 88a8  |
| 46  | Chimpanzee 94c19        |
| 47  | Chimpanzee 1d2          |
| 48  | Chimpanzee 76g32, 1m15  |
| 49  | Chimpanzee 92j15        |

|    |                   |
|----|-------------------|
| 50 | Chimpanzee 31p4   |
| 51 | Chimpanzee 76l3   |
| 52 | Chimpanzee 94a1   |
| 53 | Chimpanzee 34k3   |
| 54 | Chimpanzee 27n19  |
| 55 | Chimpanzee 20h17  |
| 56 | Chimpanzee 68f21  |
| 57 | Gorilla 42d19     |
| 58 | Chimpanzee 44a24  |
| 59 | Gorilla 28o3      |
| 60 | Chimpanzee 125n22 |
| 61 | Chimpanzee 92g8   |
| 62 | Chimpanzee 126n22 |
| 63 | Chimpanzee 70b15  |
| 64 | Macaque 30k8      |
| 65 | Macaque 45a22     |
| 66 | Baboon 54d6       |
| 67 | Baboon 56k19      |
| 68 | Macaque 5a4       |
| 69 | Macaque 47d15     |
| 70 | Macaque 35j16     |
| 71 | Macaque 61l7      |
| 72 | Macaque 41a24     |
| 73 | Baboon 51o18      |
| 74 | Baboon 61h16      |
| 75 | Baboon 58l4       |
| 76 | Baboon 63o23      |
| 77 | Baboon 67p7       |
| 78 | Macaque 175n18    |
| 79 | Macaque 165n13    |
| 80 | Baboon 65k2       |
| 81 | Macaque 80c22     |
| 82 | Baboon 50d4       |
| 83 | Baboon 61o18      |
| 84 | Baboon 60b6       |
| 85 | Baboon 55d7       |
| 86 | Baboon 63l15      |
| 87 | Baboon 65k8       |
| 88 | Baboon 51m3       |
| 89 | Baboon 59h10      |
| 90 | Baboon 52j10      |
| 91 | Baboon 65d7       |
| 92 | Baboon 70n15      |
| 93 | Baboon 207        |
| 94 | Macaque 18l14     |
| 95 | Macaque 147l22    |
| 96 | Macaque 82l23     |
| 97 | Macaque 82l23     |
| 98 | Macaque 83m4      |
| 99 | Macaque 93j17     |

---
