# Supplementary material
Source: PubMed Central journal article supplement (PMC1074792)

Figure S1

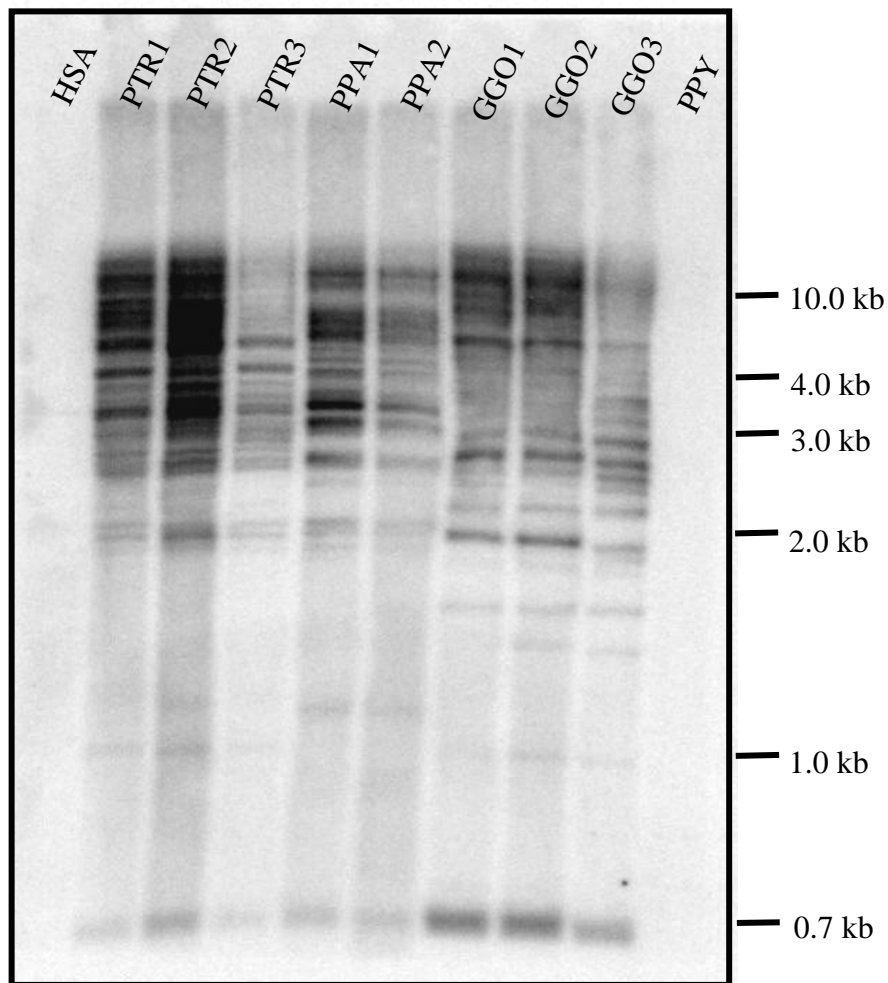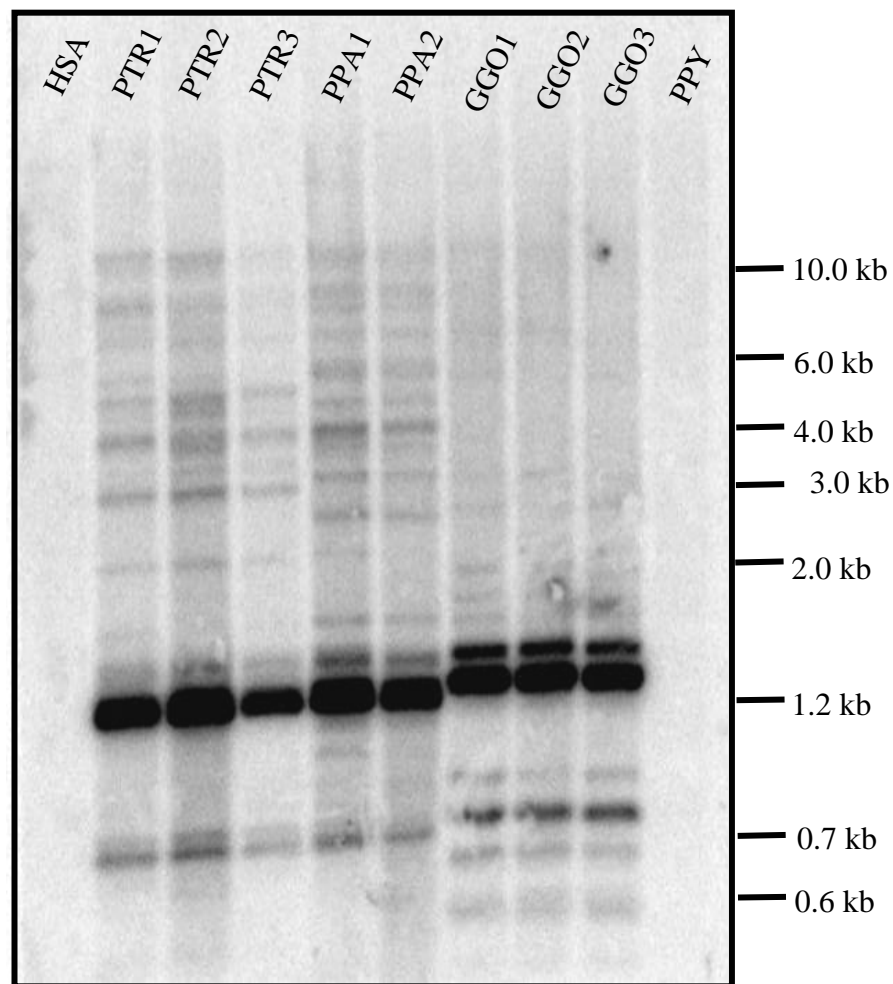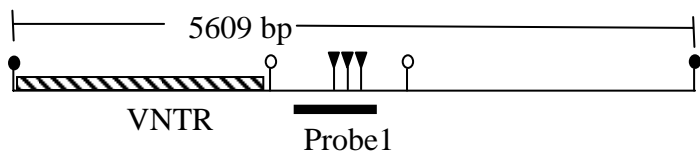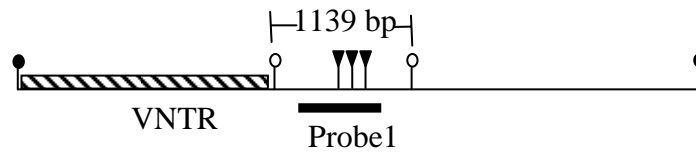

Supplement: pbio.0030110.sg001.pdf [file pbio.0030110.sg001.pdf]

Figure S2

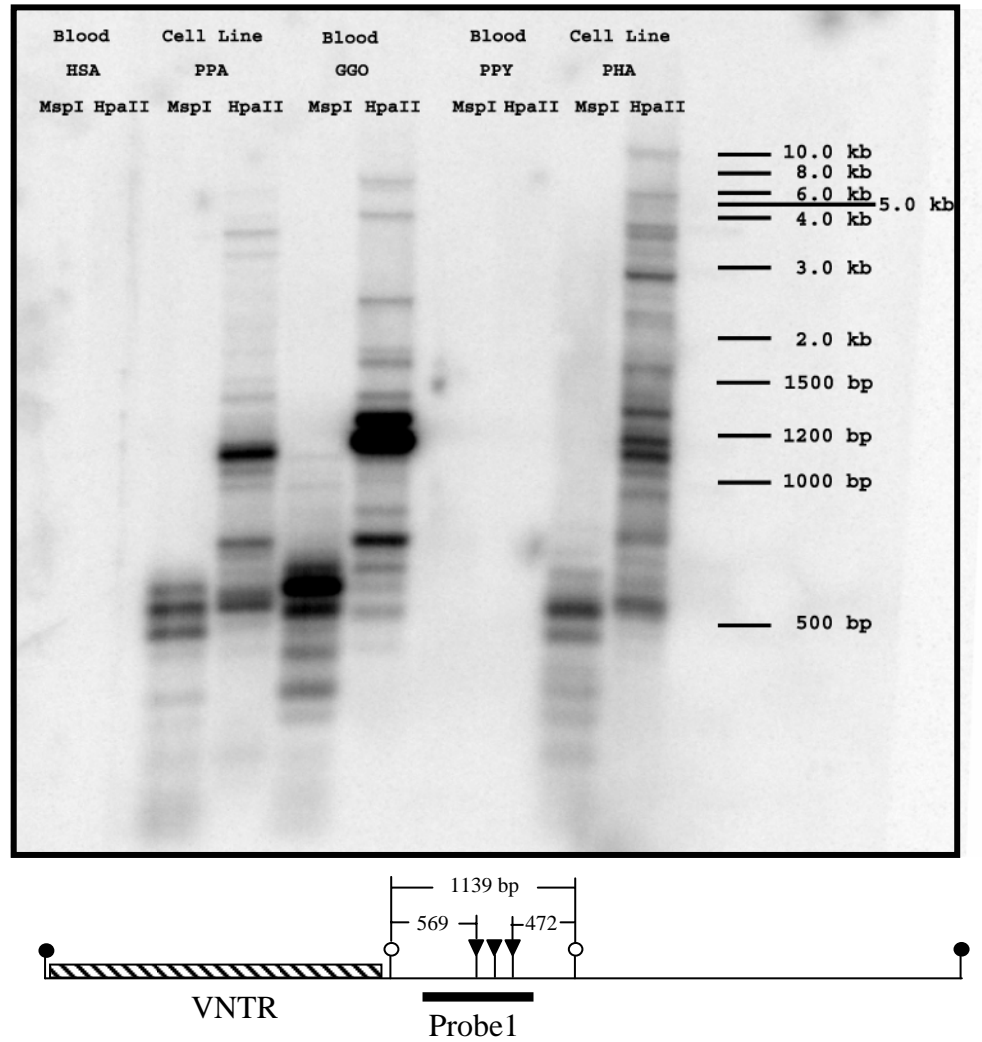

Supplement: pbio.0030110.sg002.pdf [file pbio.0030110.sg002.pdf]

Figure S3

6 putative orthologous sites in human/ape ancestor

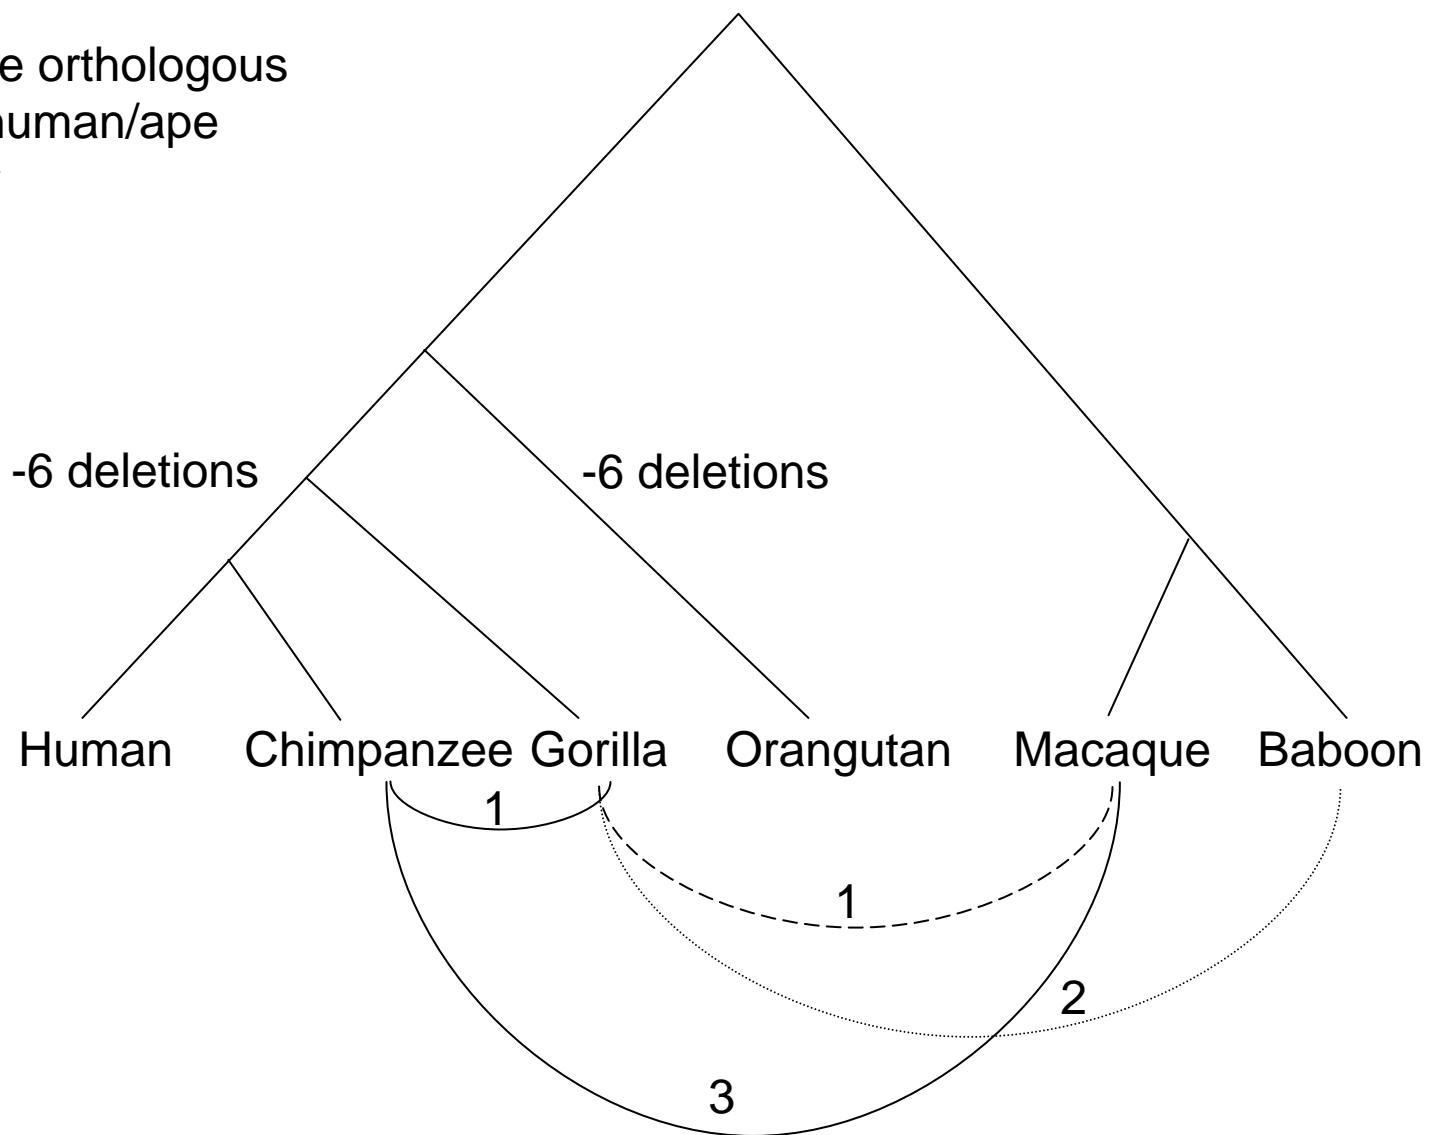

Supplement: pbio.0030110.sg003.pdf [file pbio.0030110.sg003.pdf]

Figure S6 A

env

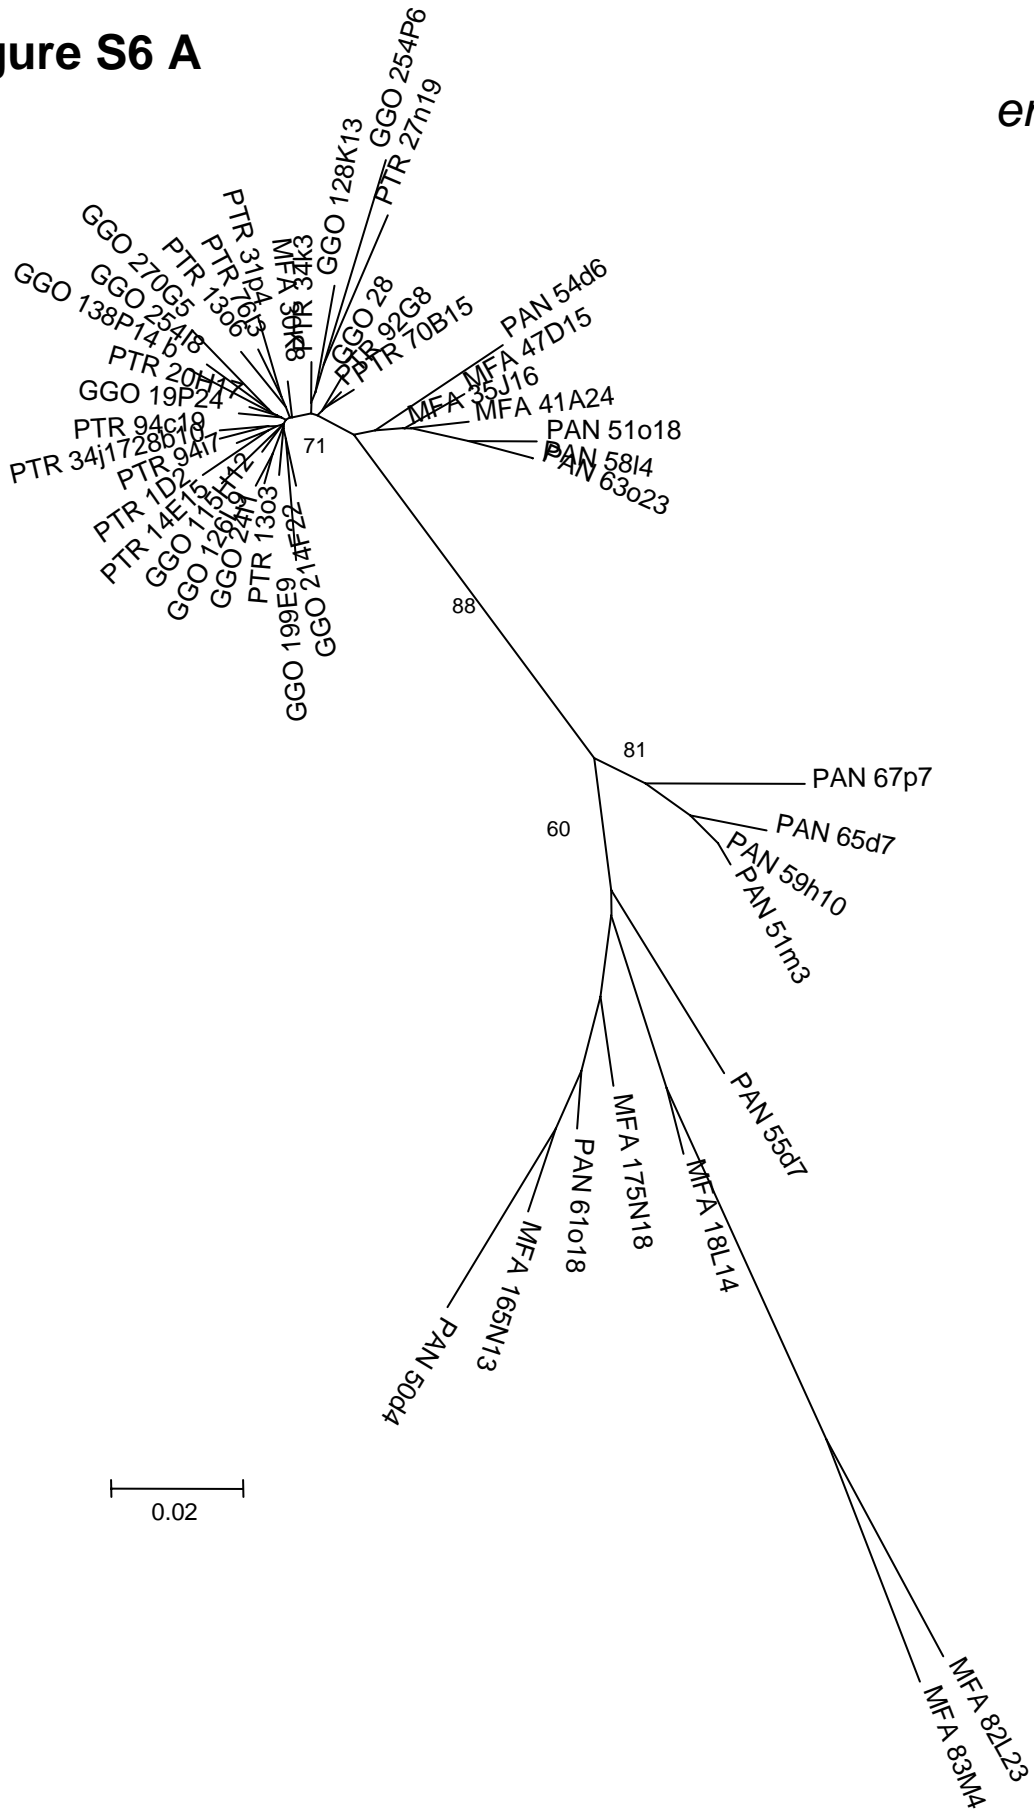

Figure S6 B

*gag*

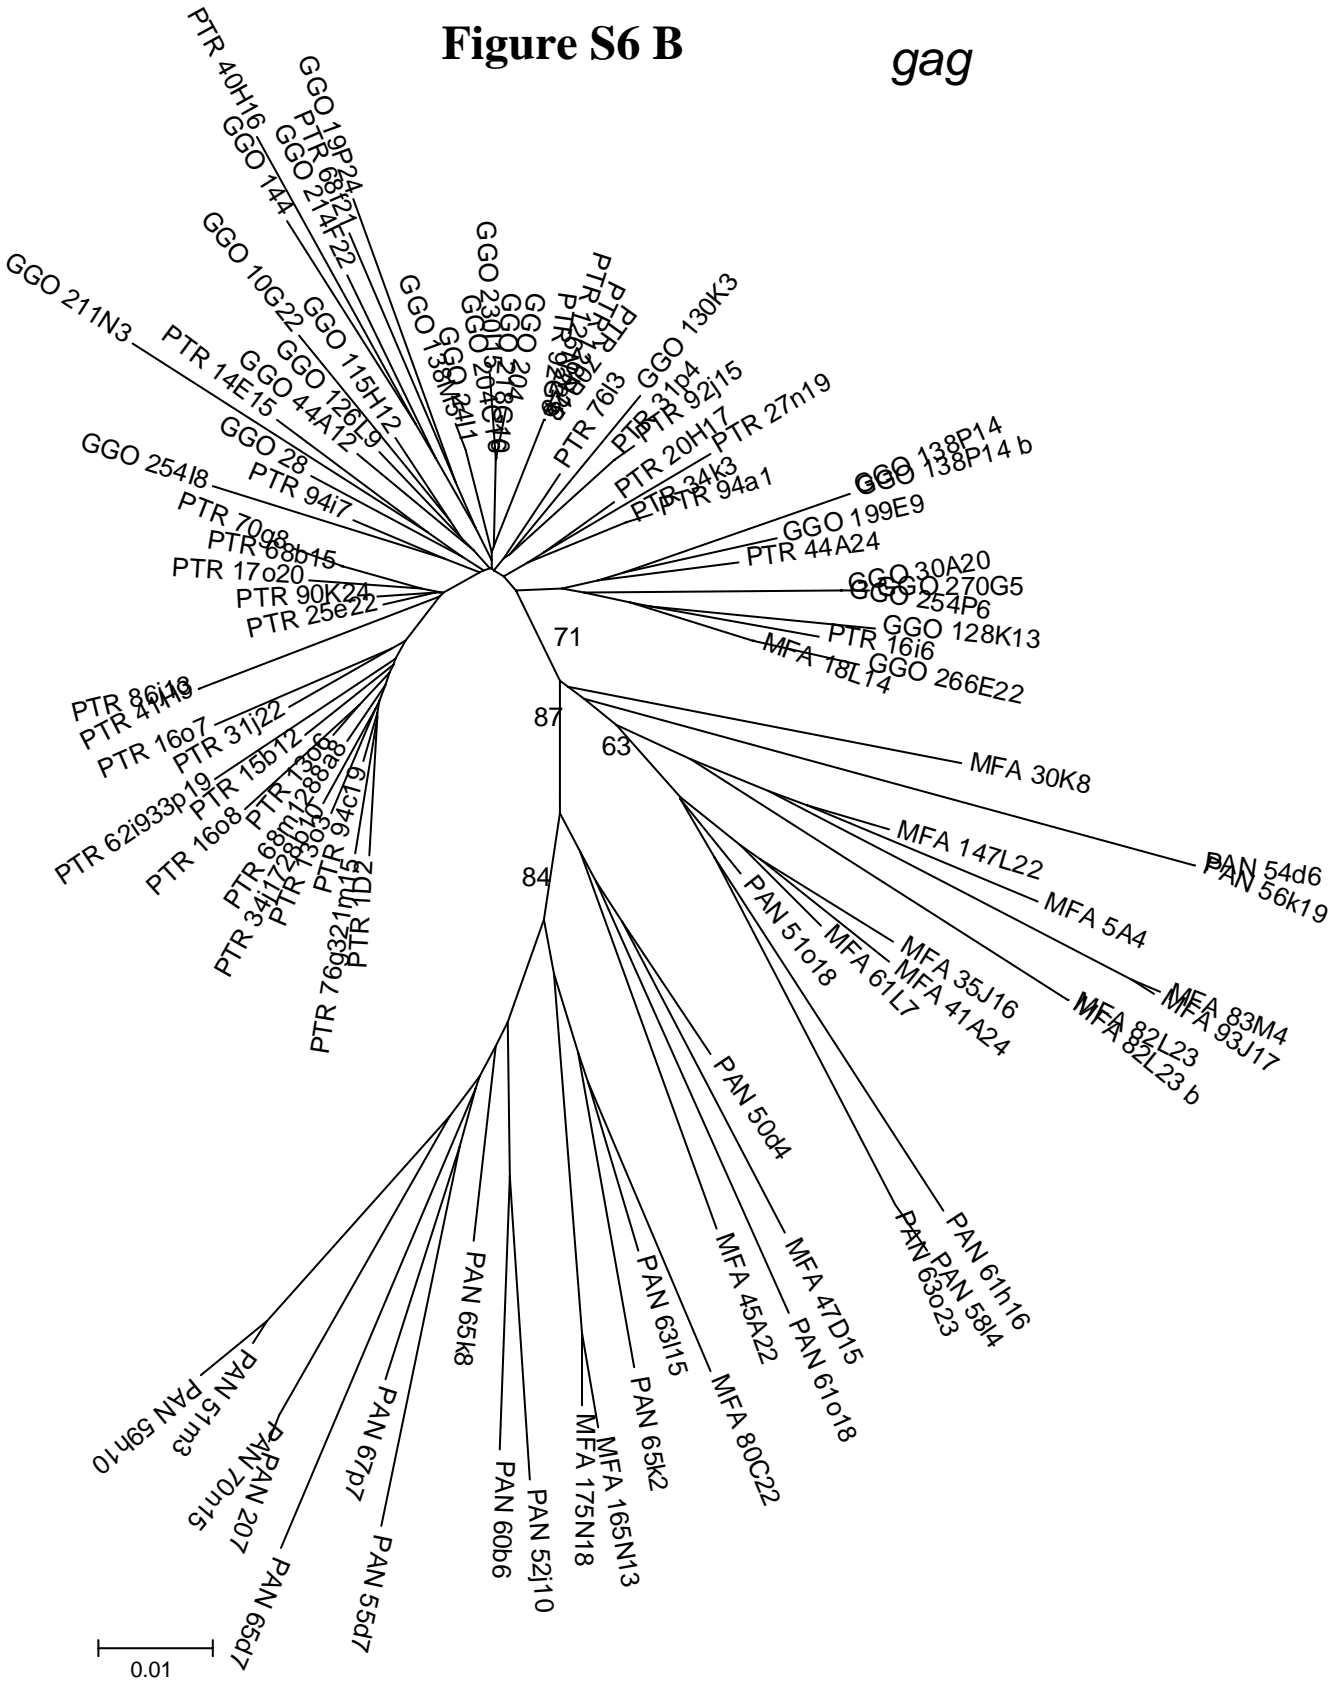

Figure S6 C

LTR

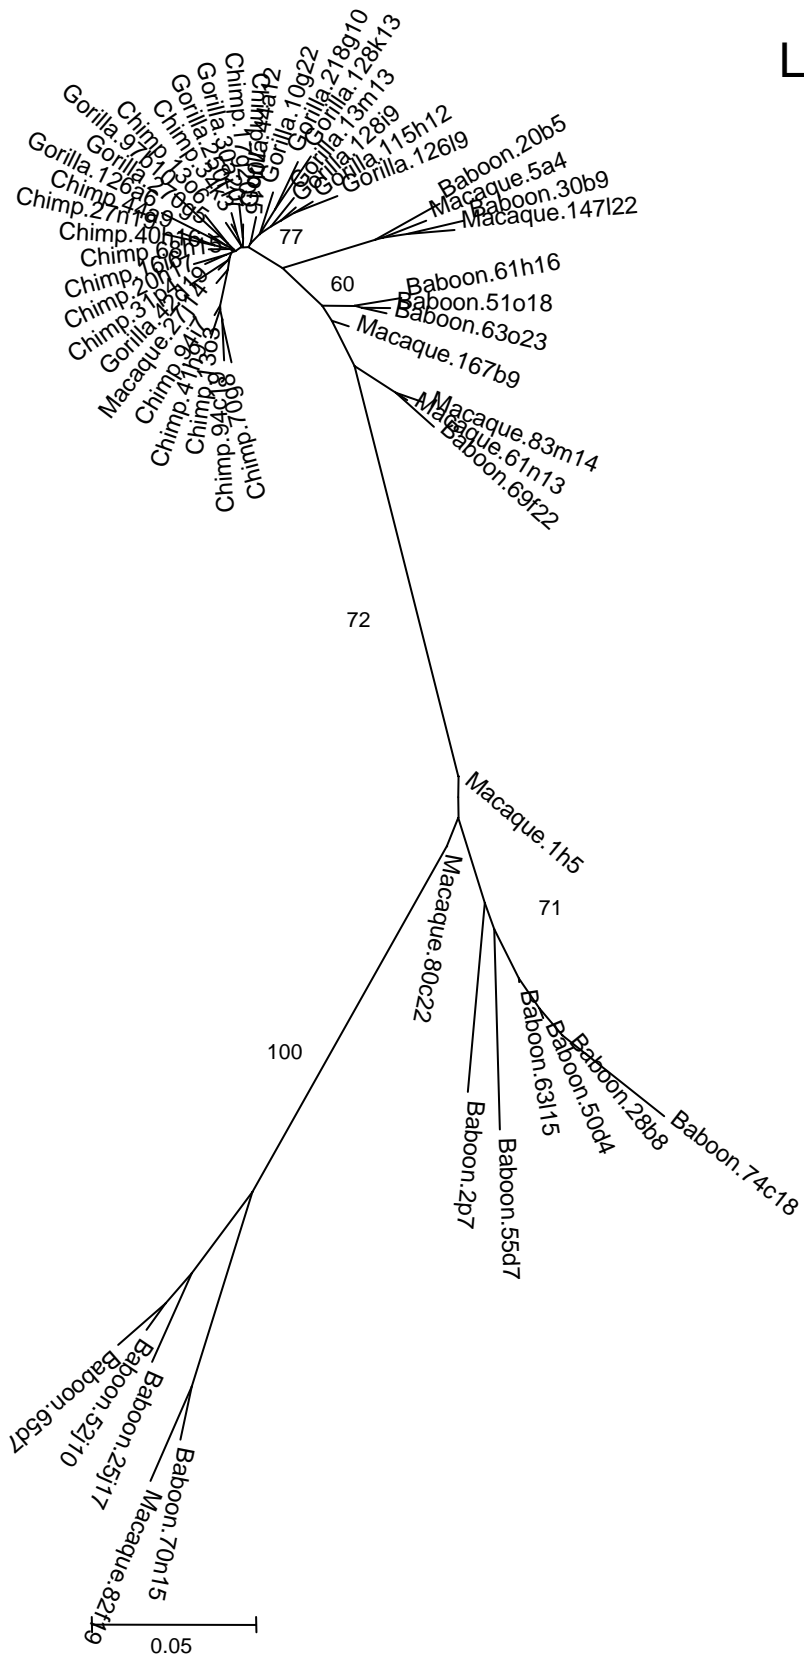

Supplement: pbio.0030110.sg006.pdf [file pbio.0030110.sg006.pdf]

Figure S7

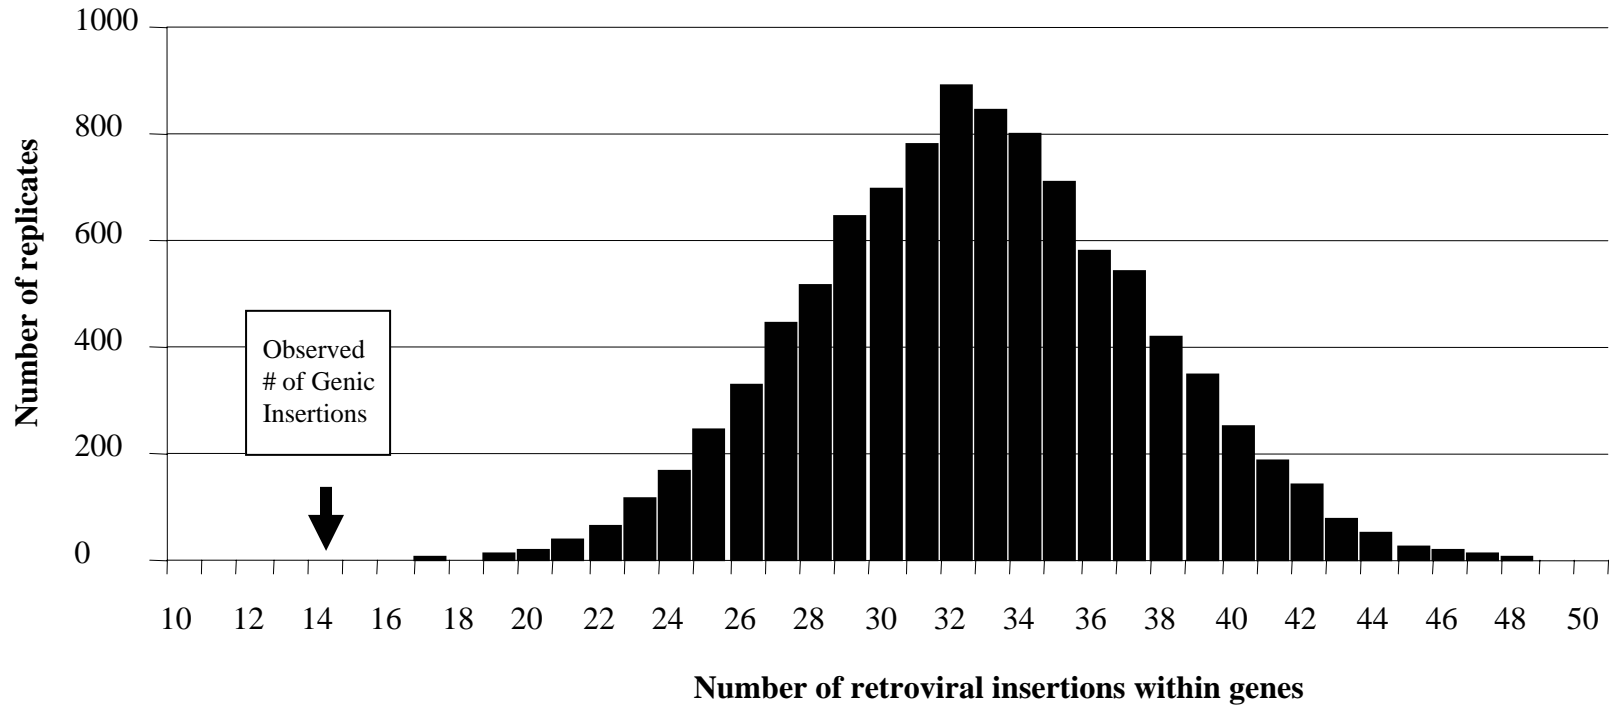

Supplement: pbio.0030110.sg007.pdf [file pbio.0030110.sg007.pdf]
